# Supplementary material for: Novel Homo-Bivalent and Polyvalent Compounds Based on Ligustrazine and Heterocyclic Ring as Anticancer Agents
Source: PubMed Central journal article supplement (PMC6943434; doi:10.3390/molecules24244505), 2019-12-09
Supplement: molecules-24-04505-s001.pdf [file molecules-24-04505-s001.pdf]

|               |          |             |           |                 |              |                        |                        |
|---------------|----------|-------------|-----------|-----------------|--------------|------------------------|------------------------|
| Sample Name   | Sample38 | Position    | P1-E2     | Instrument Name | Instrument 1 | User Name              |                        |
| Inj Vol       | -1       | InjPosition |           | SampleType      | Sample       | IRM Calibration Status | Some Ions Missed       |
| Data Filename | TD-2T4.d | ACQ Method  | chen-ms.m | Comment         |              | Acquired Time          | 11/23/2016 10:24:59 PM |

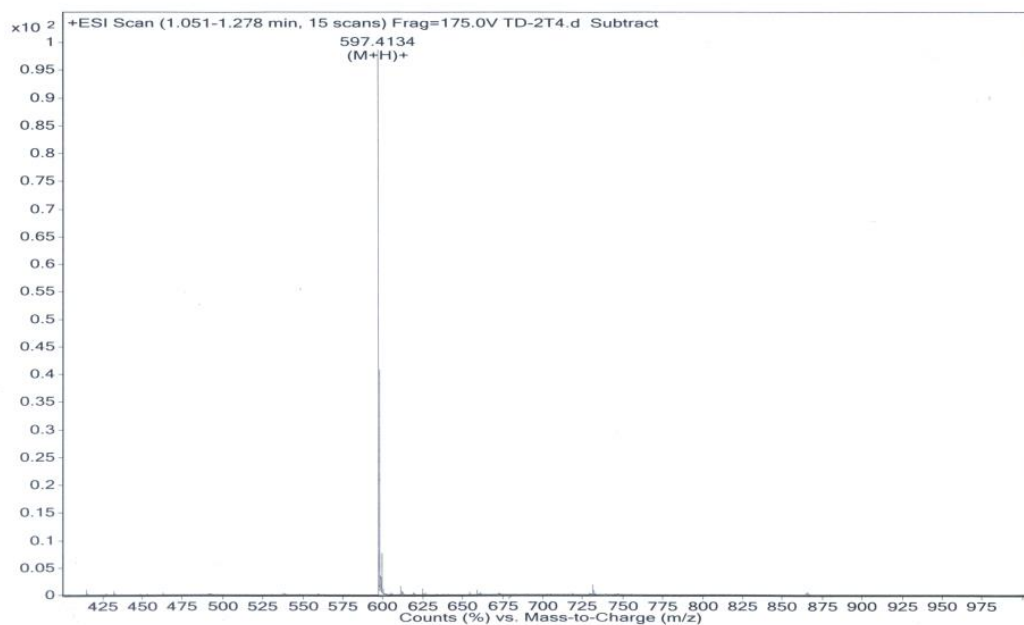

Figure S1. HRMS of compound **6a**

|               |          |             |           |                 |              |                        |                        |
|---------------|----------|-------------|-----------|-----------------|--------------|------------------------|------------------------|
| Sample Name   | Sample37 | Position    | P1-E1     | Instrument Name | Instrument 1 | User Name              |                        |
| Inj Vol       | -1       | InjPosition |           | SampleType      | Sample       | IRM Calibration Status | Some Ions Missed       |
| Data Filename | TD-3T4.d | ACQ Method  | chen-ms.m | Comment         |              | Acquired Time          | 11/23/2016 10:18:10 PM |

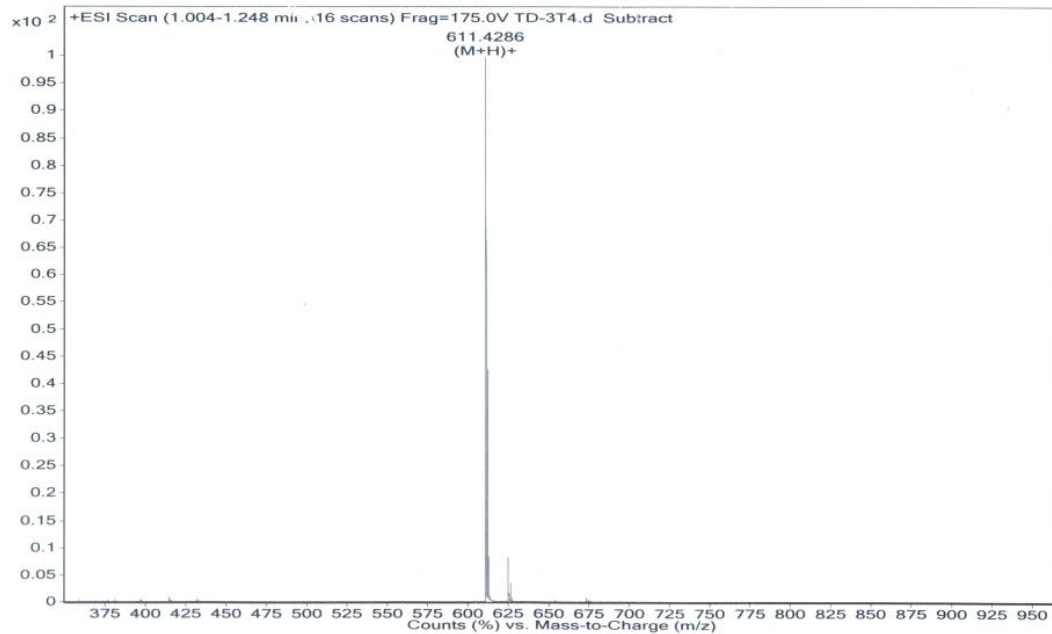

Figure S2. HRMS of compound **6b**

|               |          |             |           |                 |              |                        |                        |
|---------------|----------|-------------|-----------|-----------------|--------------|------------------------|------------------------|
| Sample Name   | Sample36 | Position    | P1-D9     | Instrument Name | Instrument 1 | User Name              |                        |
| Inj Vol       | -1       | InjPosition |           | SampleType      | Sample       | IRM Calibration Status | Some Ions Missed       |
| Data Filename | TD-4T4.d | ACQ Method  | chen-ms.m | Comment         |              | Acquired Time          | 11/23/2016 10:12:05 PM |

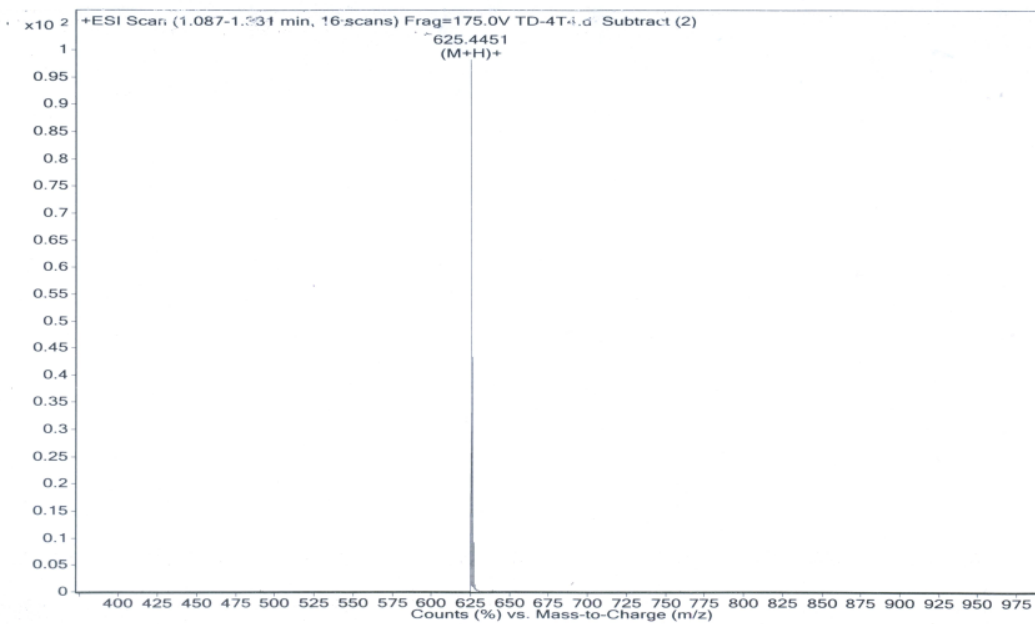

Figure S3. HRMS of compound **6c**

Varian ProMALDI  
File: L6-3(2)\_MALDI.trans

Mode: Positive Date: 24-JUN-2016  
Scans: 1 Time: 14:42:53  
Scale: 1.8276

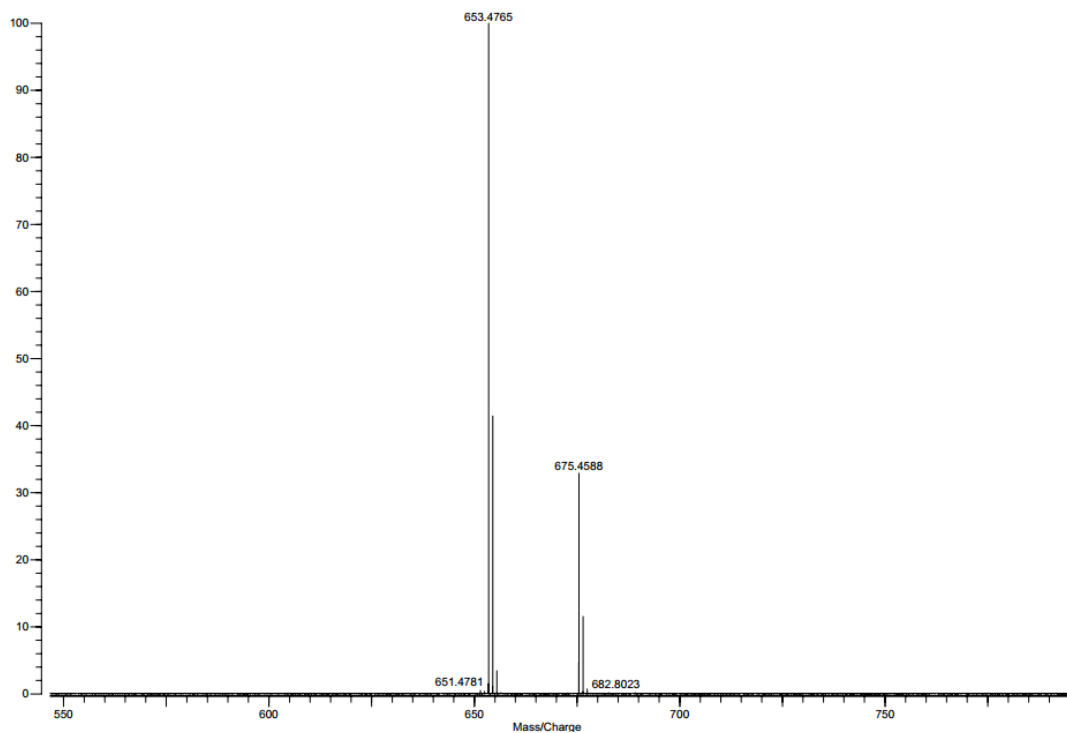

Figure S4. HRMS of compound **6d**

|               |          |             |           |                 |              |                        |                        |
|---------------|----------|-------------|-----------|-----------------|--------------|------------------------|------------------------|
| Sample Name   | Sample35 | Position    | P1-D8     | Instrument Name | Instrument 1 | User Name              |                        |
| Inj Vol       | -1       | InjPosition |           | SampleType      | Sample       | IRM Calibration Status | Some Ions Missed       |
| Data Filename | TD-8T4.d | ACQ Method  | chen-ms.m | Comment         |              | Acquired Time          | 11/23/2016 10:05:29 PM |

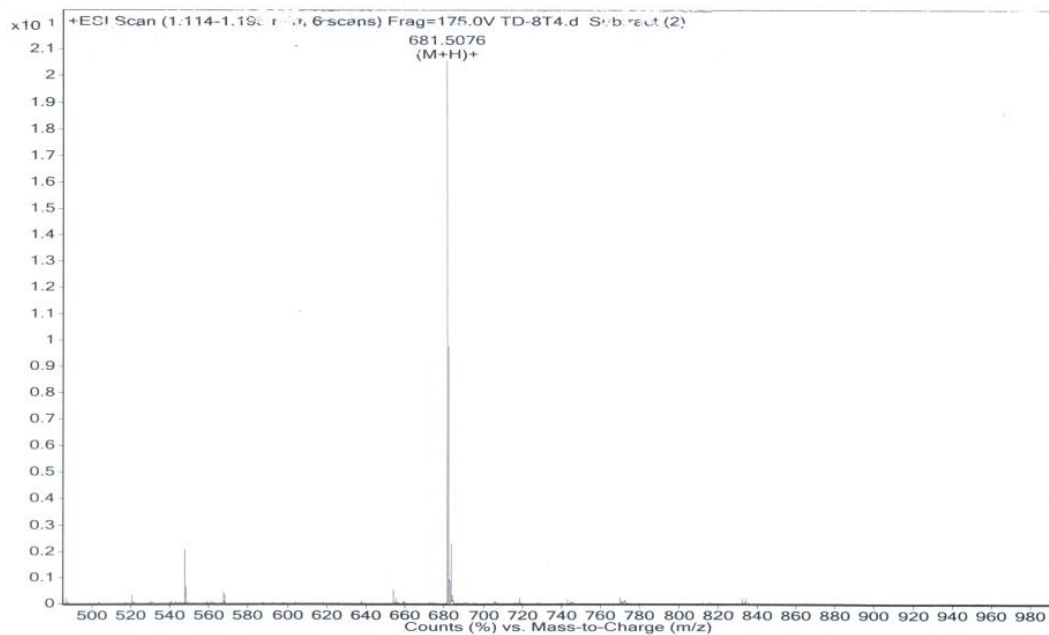

Figure S5. HRMS of compound **6e**

|               |          |             |           |                 |              |                        |                       |
|---------------|----------|-------------|-----------|-----------------|--------------|------------------------|-----------------------|
| Sample Name   | Sample18 | Position    | P1-B9     | Instrument Name | Instrument 1 | User Name              |                       |
| Inj Vol       | -1       | InjPosition |           | SampleType      | Sample       | IRM Calibration Status | Some Ions Missed      |
| Data Filename | 10T4.d   | ACQ Method  | chen-ms.m | Comment         |              | Acquired Time          | 12/13/2016 1:42:42 AM |

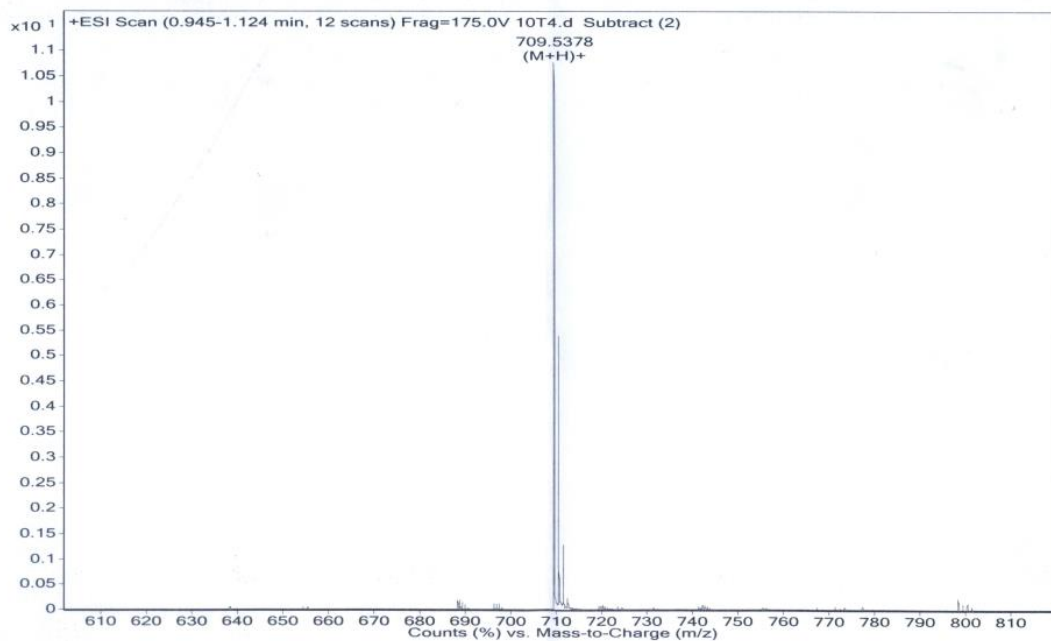

Figure S6. HRMS of compound **6f**

|               |          |             |           |                 |              |                        |                       |
|---------------|----------|-------------|-----------|-----------------|--------------|------------------------|-----------------------|
| Sample Name   | Sample19 | Position    | P1-C1     | Instrument Name | Instrument 1 | User Name              |                       |
| Inj Vol       | -1       | InjPosition |           | SampleType      | Sample       | IRM Calibration Status | Some Ions Missed      |
| Data Filename | 12T4.d   | ACQ Method  | chen-rs.m | Comment         |              | Acquired Time          | 12/13/2016 1:48:23 AM |

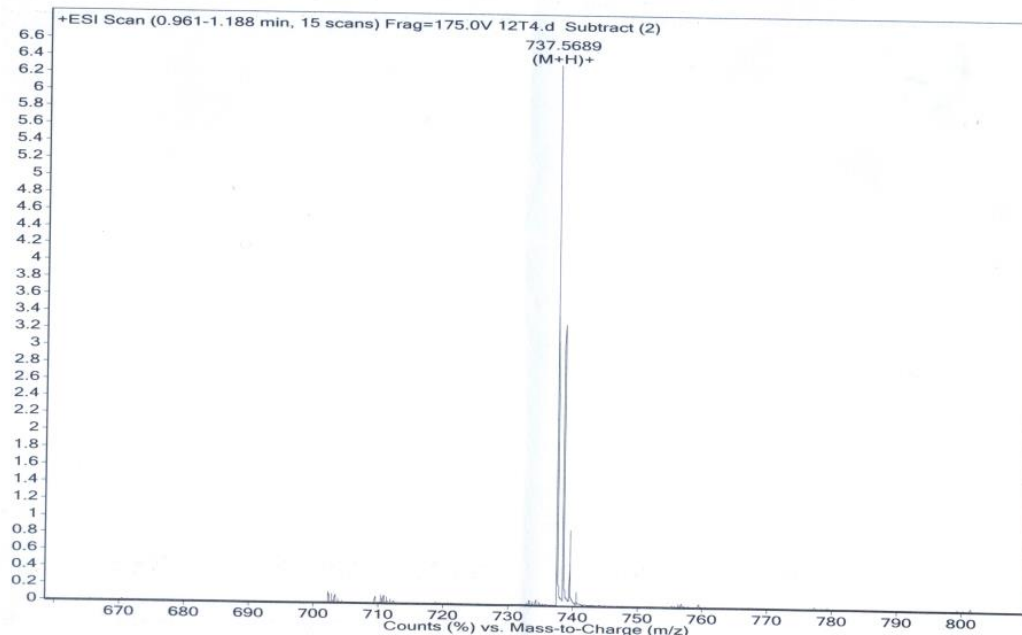

Figure S7. HRMS of compound **6g**

|               |          |             |           |                 |              |                        |                        |
|---------------|----------|-------------|-----------|-----------------|--------------|------------------------|------------------------|
| Sample Name   | Sample39 | Position    | P1-E3     | Instrument Name | Instrument 1 | User Name              |                        |
| Inj Vol       | -1       | InjPosition |           | SampleType      | Sample       | IRM Calibration Status | Some Ions Missed       |
| Data Filename | TD-117.d | ACQ Method  | chen-rs.m | Comment         |              | Acquired Time          | 11/23/2016 10:32:13 PM |

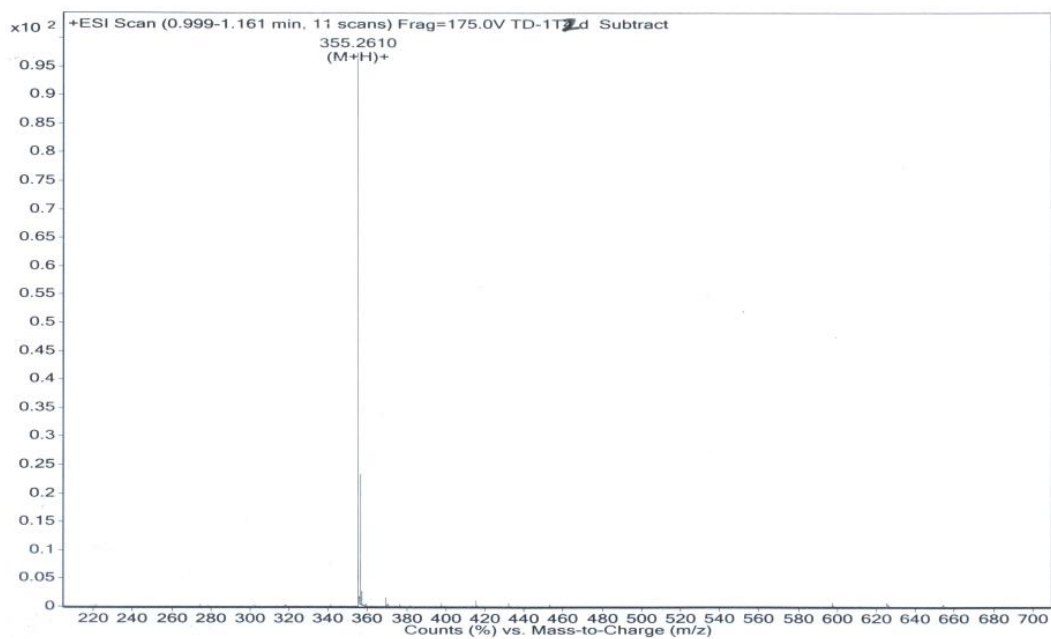

Figure S8. HRMS of compound **6h**

|               |         |             |           |                 |              |                        |                      |
|---------------|---------|-------------|-----------|-----------------|--------------|------------------------|----------------------|
| Sample Name   | Sample1 | Position    | P1-B1     | Instrument Name | Instrument 1 | User Name              |                      |
| Inj Vol       | -1      | InjPosition |           | SampleType      | Sample       | IRM Calibration Status | Some Ions Missed     |
| Data Filename | 2-T2.d  | ACQ Method  | chen-ms.m | Comment         |              | Acquired Time          | 12/6/2016 6:32:49 PM |

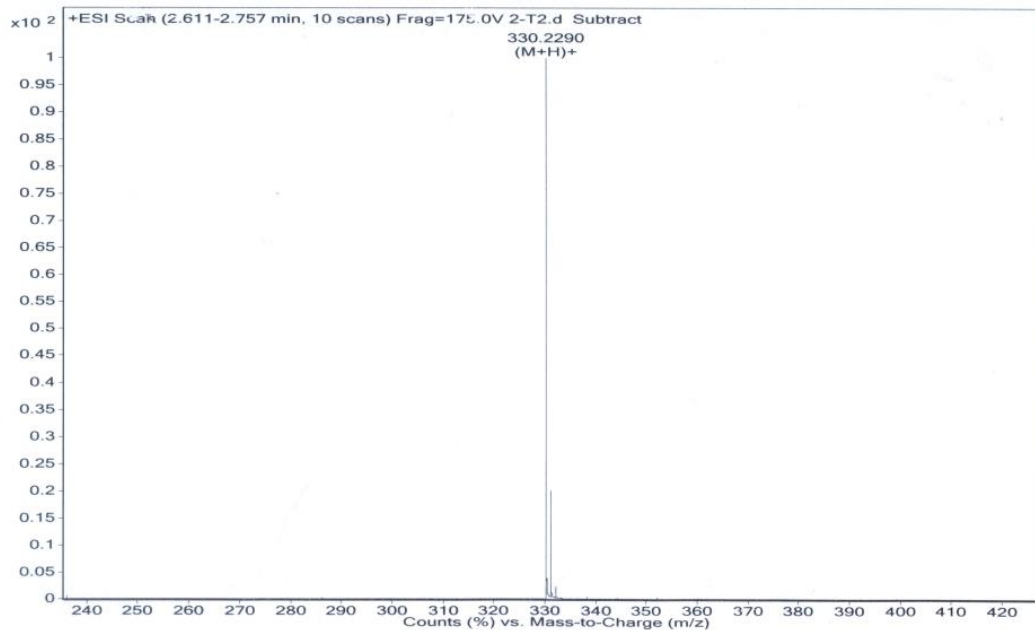

Figure S9. HRMS of compound **6i**

|               |          |             |           |                 |              |                        |                      |
|---------------|----------|-------------|-----------|-----------------|--------------|------------------------|----------------------|
| Sample Name   | Sample8  | Position    | P1-A9     | Instrument Name | Instrument 1 | User Name              |                      |
| Inj Vol       | -1       | InjPosition |           | SampleType      | Sample       | IRM Calibration Status | Some Ions Missed     |
| Data Filename | 3-O-T2.d | ACQ Method  | chen-ms.m | Comment         |              | Acquired Time          | 12/6/2016 6:27:09 PM |

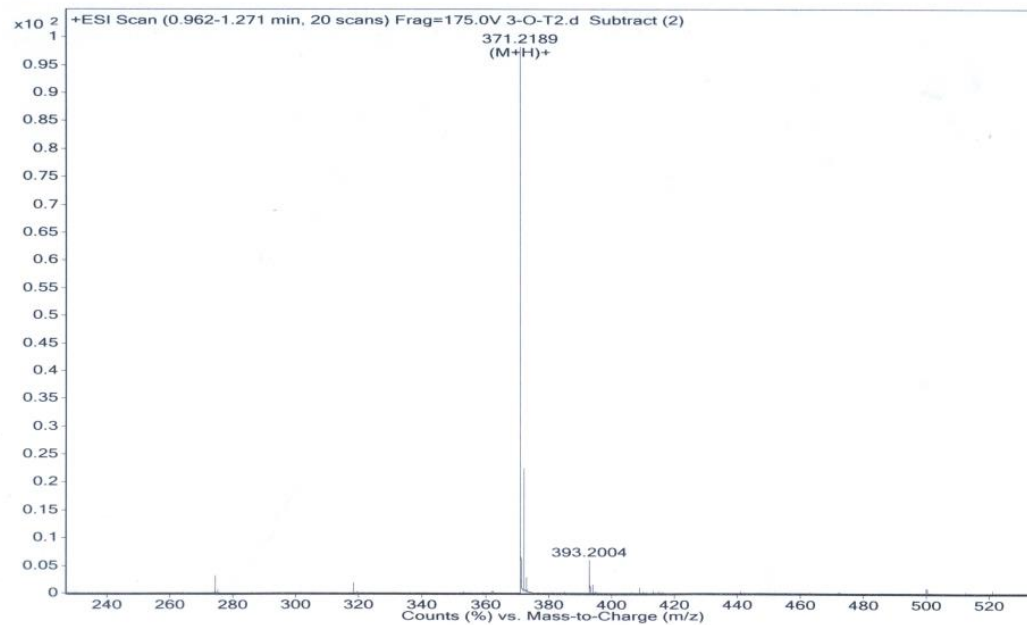

Figure S10. HRMS of compound **8a**

|               |          |             |           |                 |              |                        |                      |
|---------------|----------|-------------|-----------|-----------------|--------------|------------------------|----------------------|
| Sampl. Name   | Sample7  | Position    | P1-A6     | Instrument Name | Instrument 1 | User Name              |                      |
| Inj Vol       | -1       | InjPosition |           | SampleType      | Sample       | IRM Calibration Status | Some Ions Missed     |
| Data Filename | 4-O-T2.d | ACQ Method  | chen-ms.m | Comment         |              | Acquired Time          | 12/6/2016 6:21:28 PM |

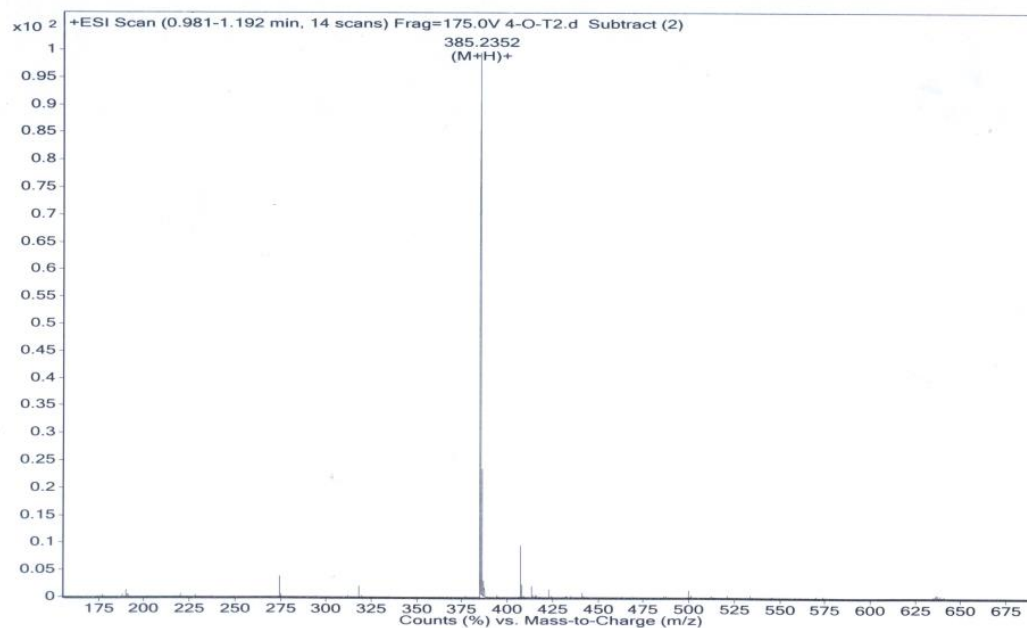

Figure S11. HRMS of compound **8b**

|               |          |             |           |                 |              |                        |                      |
|---------------|----------|-------------|-----------|-----------------|--------------|------------------------|----------------------|
| Sampl. Name   | Sample7  | Position    | P1-77     | Instrument Name | Instrument 1 | User Name              |                      |
| Inj Vol       | -1       | InjPosition |           | SampleType      | Sample       | IRM Calibration Status | Some Ions Missed     |
| Data Filename | 6-O-T2.d | ACQ Method  | chen-ms.m | Comment         |              | Acquired Time          | 12/6/2016 6:15:46 PM |

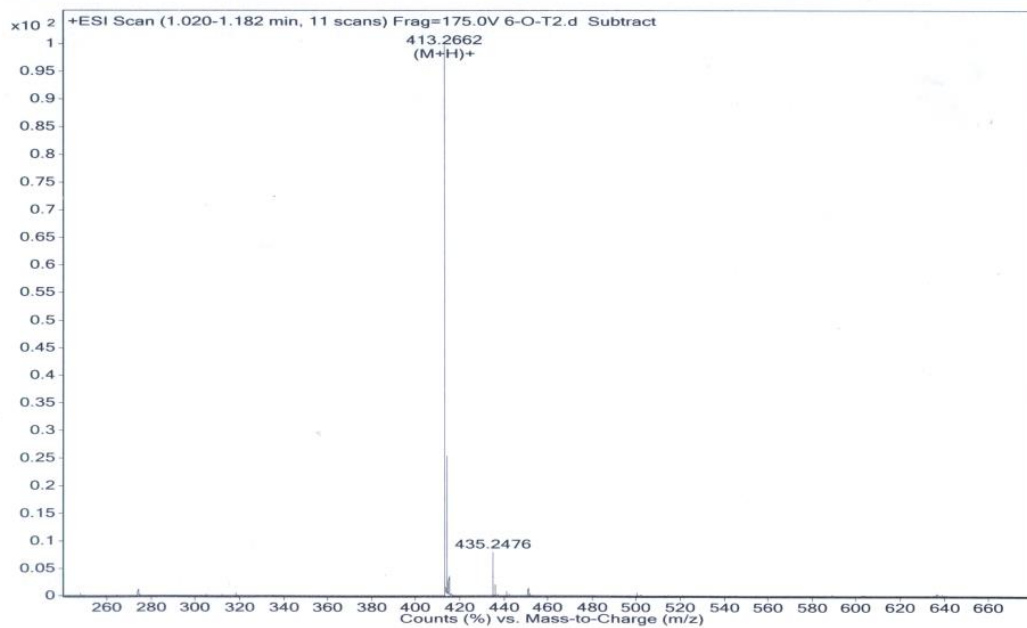

Figure S12. HRMS of compound **8c**

|               |          |             |           |                 |              |                        |                      |
|---------------|----------|-------------|-----------|-----------------|--------------|------------------------|----------------------|
| Sample Name   | Sample6  | Position    | P1-A6     | Instrument Name | Instrument 1 | User Name              |                      |
| Inj Vol       | -1       | InjPosition |           | SampleType      | Sample       | IRM Calibration Status | Some Ions Missed     |
| Data Filename | 8-O-T2.d | ACQ Method  | chen-ms.m | Comment         |              | Acquired Time          | 12/6/2016 6:10:05 PM |

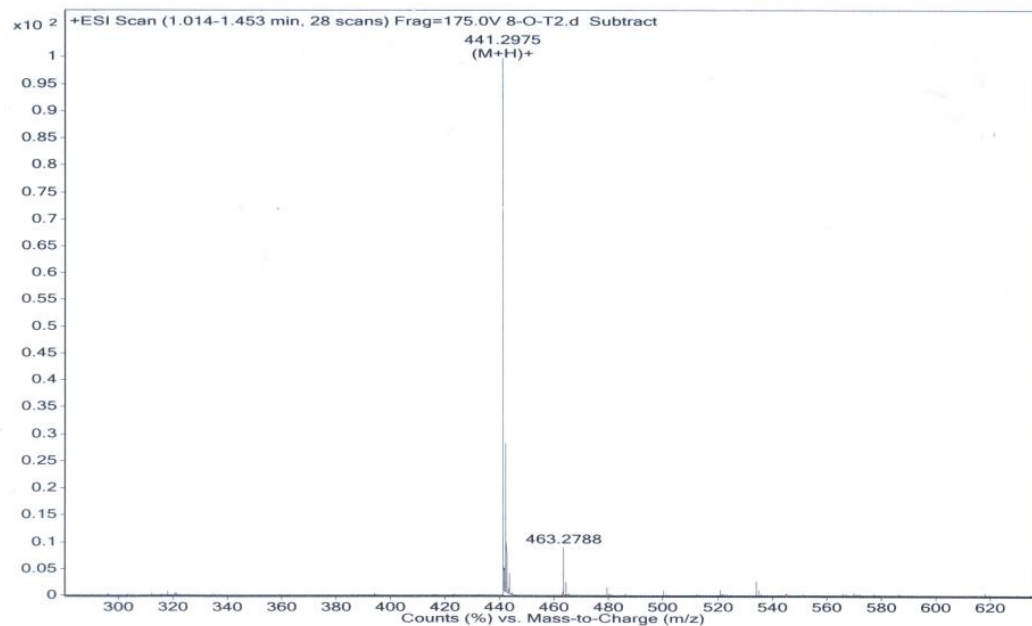

Figure S13. HRMS of compound **8d**

|               |          |             |           |                 |              |                        |                       |
|---------------|----------|-------------|-----------|-----------------|--------------|------------------------|-----------------------|
| Sample Name   | Sample20 | Position    | P1-C2     | Instrument Name | Instrument 1 | User Name              |                       |
| Inj Vol       | -1       | InjPosition |           | SampleType      | Sample       | IRM Calibration Status | Some Ions Missed      |
| Data Filename | 10-OT2.d | ACQ Method  | chen-ms.m | Comment         |              | Acquired Time          | 12/13/2016 1:54:03 AM |

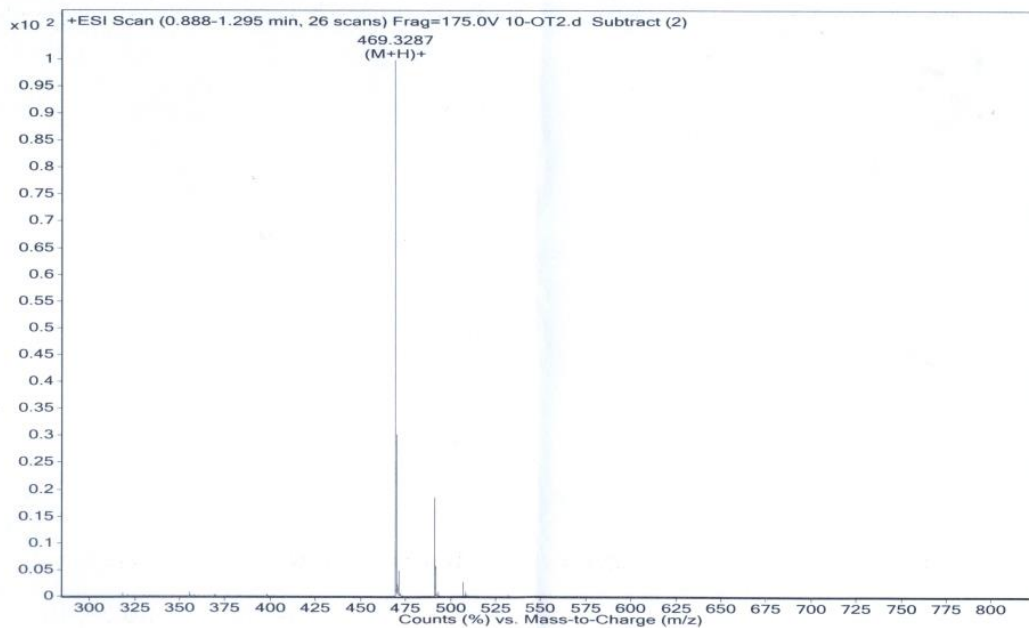

Figure S14. HRMS of compound **8e**

|               |           |             |           |                 |              |                        |                       |
|---------------|-----------|-------------|-----------|-----------------|--------------|------------------------|-----------------------|
| Sample Name   | Sample21  | Position    | P1-C3     | Instrument Name | Instrument 1 | User Name              |                       |
| Inj Vol       | -1        | InjPosition |           | SampleType      | Sample       | IRM Calibration Status | Some Ions Missed      |
| Data Filename | 12-O-T2.d | ACQ Method  | chen-ms.m | Comment         |              | Acquired Time          | 12/13/2016 1:59:44 AM |

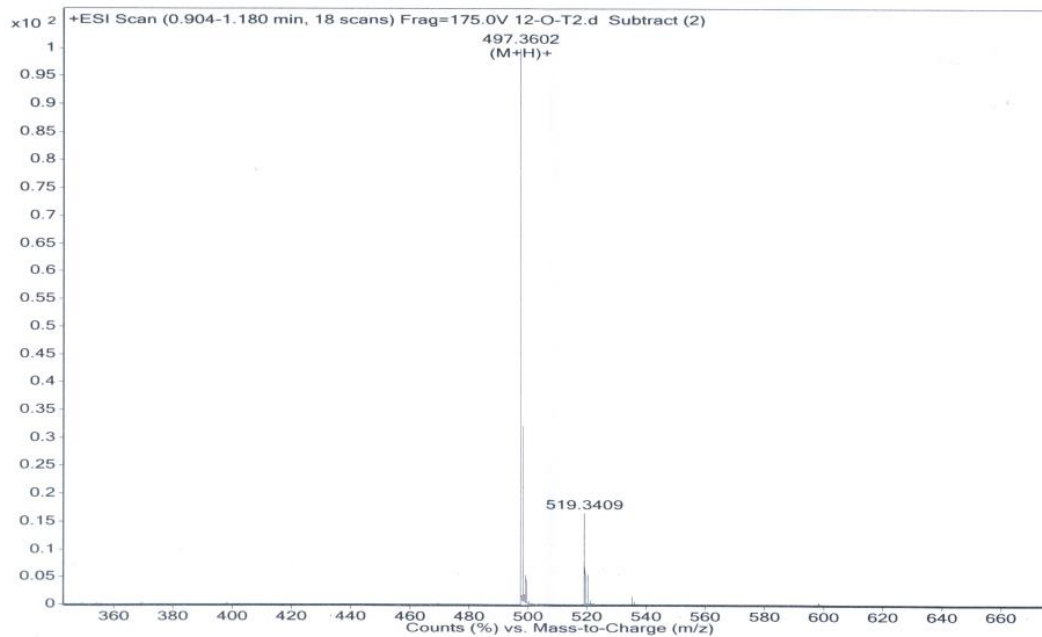

Figure S15. HRMS of compound **8f**

|               |         |             |                |                 |              |                        |                   |
|---------------|---------|-------------|----------------|-----------------|--------------|------------------------|-------------------|
| Sample Name   | Sample9 | Position    | P1-A9          | Instrument Name | Instrument 1 | User Name              |                   |
| Inj Vol       | -1      | InjPosition |                | SampleType      | Sample       | IRM Calibration Status | Some Ions Missed  |
| Data Filename | LS-L2.d | ACQ Method  | Default-TEST.m | Comment         |              | Acquired Time          | 6/11/2018 5:19:36 |

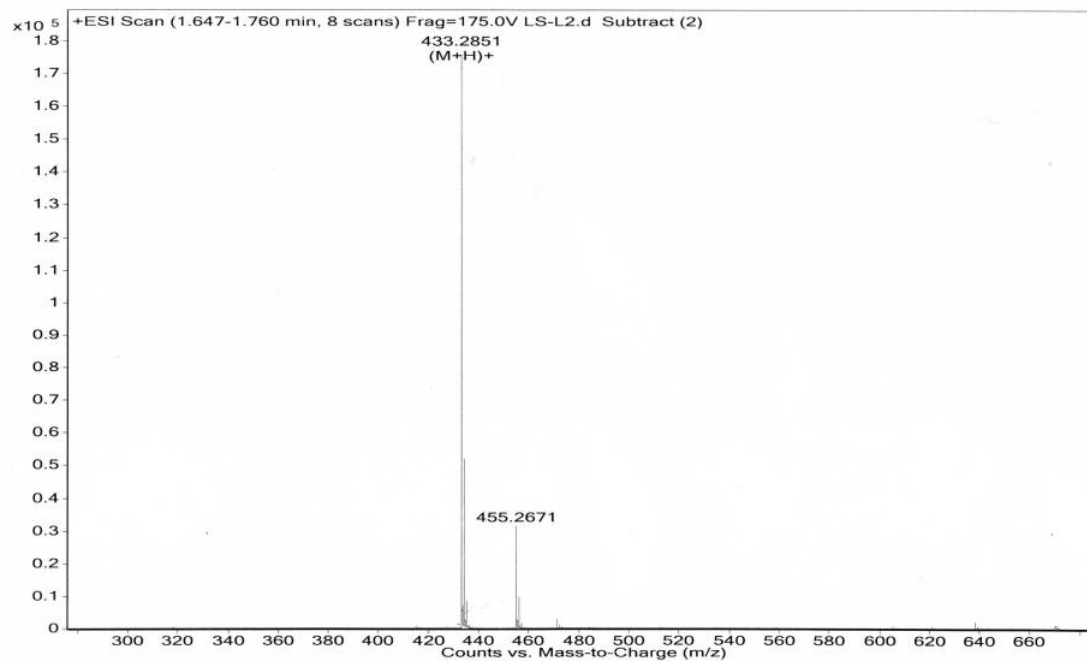

Figure S16. HRMS of compound **9e**



|               |         |             |                |                 |              |                        |                   |
|---------------|---------|-------------|----------------|-----------------|--------------|------------------------|-------------------|
| Sample Name   | Sample8 | Position    | P1-A8          | Instrument Name | Instrument 1 | User Name              |                   |
| Inj Vol       | -1      | InjPosition |                | SampleType      | Sample       | IRM Calibration Status | Some Ions Missed  |
| Data Filename | LS-L1.d | ACQ Method  | Default-TEST.m | Comment         |              | Acquired Time          | 6/11/2018 5:13:47 |

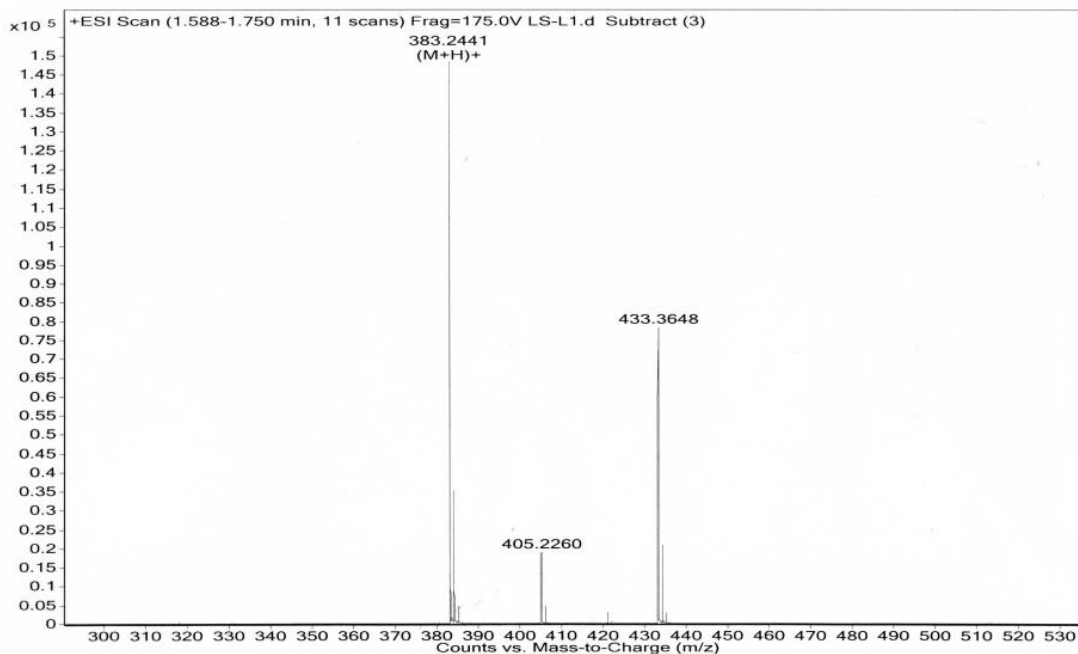

Figure S17. HRMS of compound **10e**

|               |         |             |                |                 |              |                        |                   |
|---------------|---------|-------------|----------------|-----------------|--------------|------------------------|-------------------|
| Sample Name   | Sample5 | Position    | P1-A5          | Instrument Name | Instrument 1 | User Name              |                   |
| Inj Vol       | -1      | InjPosition |                | SampleType      | Sample       | IRM Calibration Status | Some Ions Missed  |
| Data Filename | LS-11.d | ACQ Method  | Default-TEST.m | Comment         |              | Acquired Time          | 8/28/2018 10:45:3 |

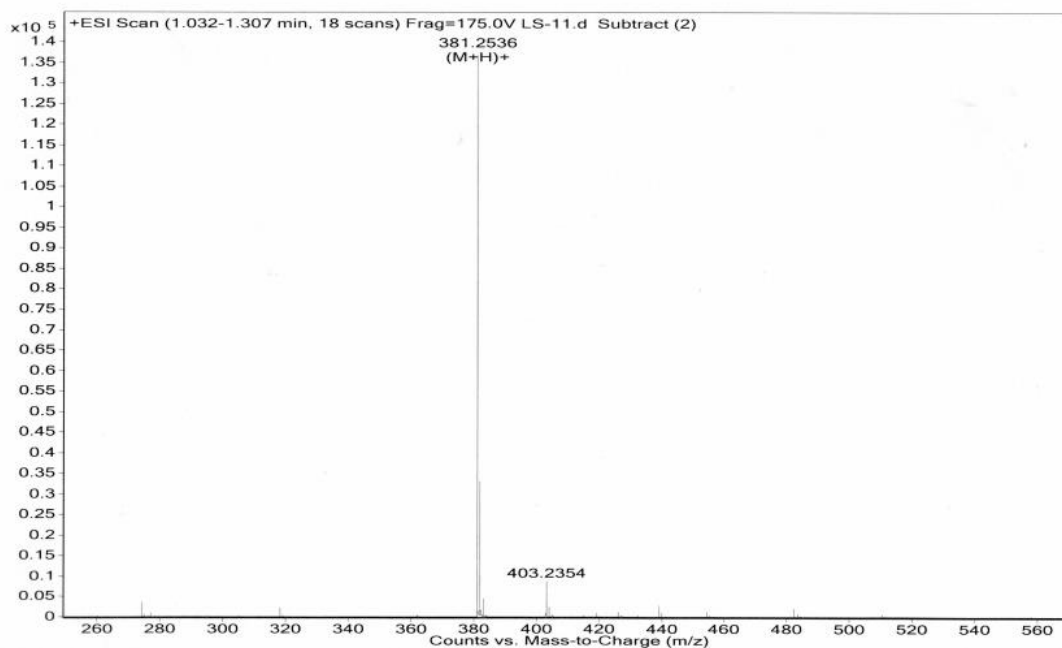

Figure S18. HRMS of compound **11e**

|               |         |             |                |                 |              |                        |                   |
|---------------|---------|-------------|----------------|-----------------|--------------|------------------------|-------------------|
| Sample Name   | Sample6 | Position    | P1-A6          | Instrument Name | Instrument 1 | User Name              |                   |
| Inj Vol       | -1      | InjPosition |                | SampleType      | Sample       | IRM Calibration Status | Some Ions Missed  |
| Data Filename | LS-12.d | ACQ Method  | Default-TEST.m | Comment         |              | Acquired Time          | 8/28/2018 10:52:2 |

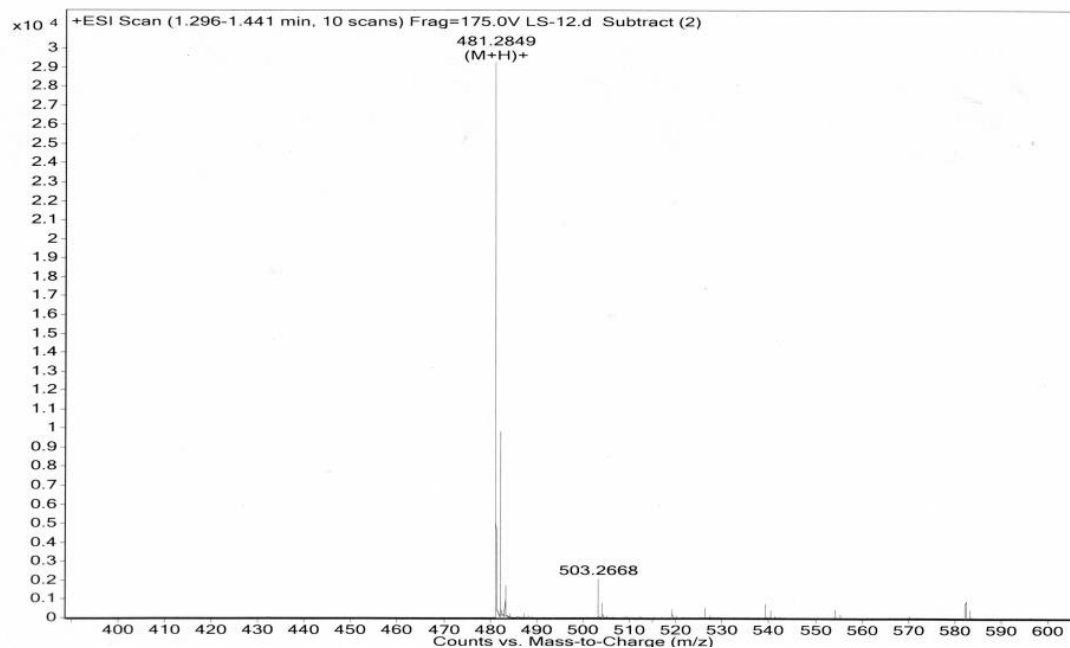

Figure S19. HRMS of compound 12e

|               |         |             |                |                 |              |                        |                    |
|---------------|---------|-------------|----------------|-----------------|--------------|------------------------|--------------------|
| Sample Name   | Sample7 | Position    | P1-A7          | Instrument Name | Instrument 1 | User Name              |                    |
| Inj Vol       | -1      | InjPosition |                | SampleType      | Sample       | IRM Calibration Status | Some Ions Missed   |
| Data Filename | LS-13.d | ACQ Method  | Default-TEST.m | Comment         |              | Acquired Time          | 8/28/2018 10:59:11 |

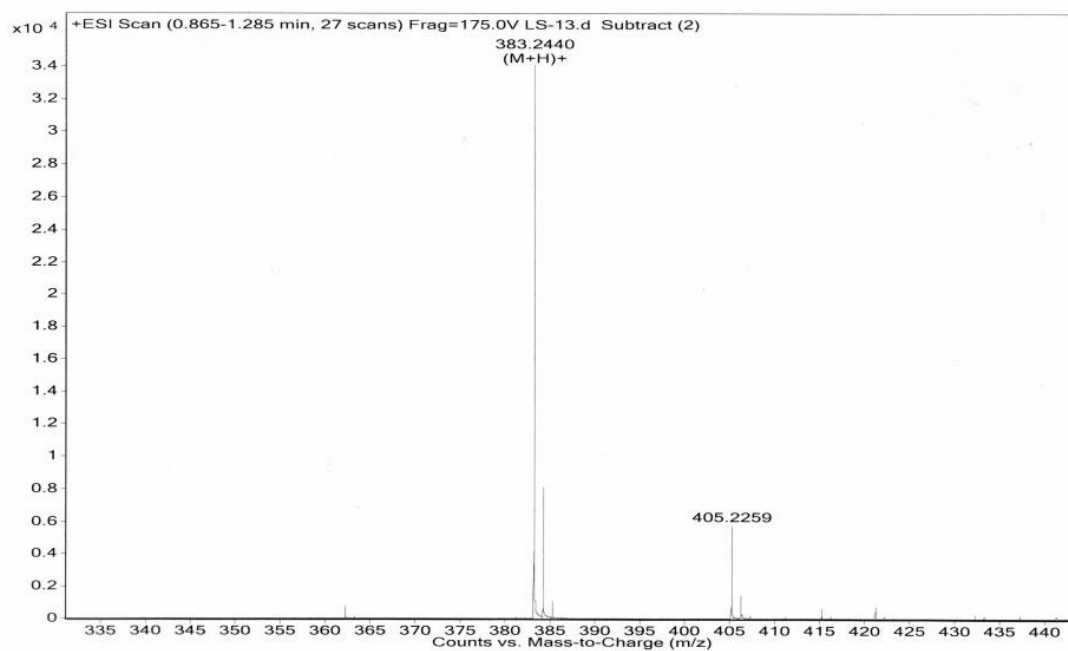

Figure S20. HRMS of compound 13e

|               |         |             |                |                 |              |                        |                    |
|---------------|---------|-------------|----------------|-----------------|--------------|------------------------|--------------------|
| Sample Name   | Sample8 | Position    | P1-A8          | Instrument Name | Instrument 1 | User Name              |                    |
| Inj Vol       | -1      | InjPosition |                | SampleType      | Sample       | IRM Calibration Status | Some Ions Missed   |
| Data Filename | LS-14.d | ACQ Method  | Default-TEST.m | Comment         |              | Acquired Time          | 8/28/2018 11:06:01 |

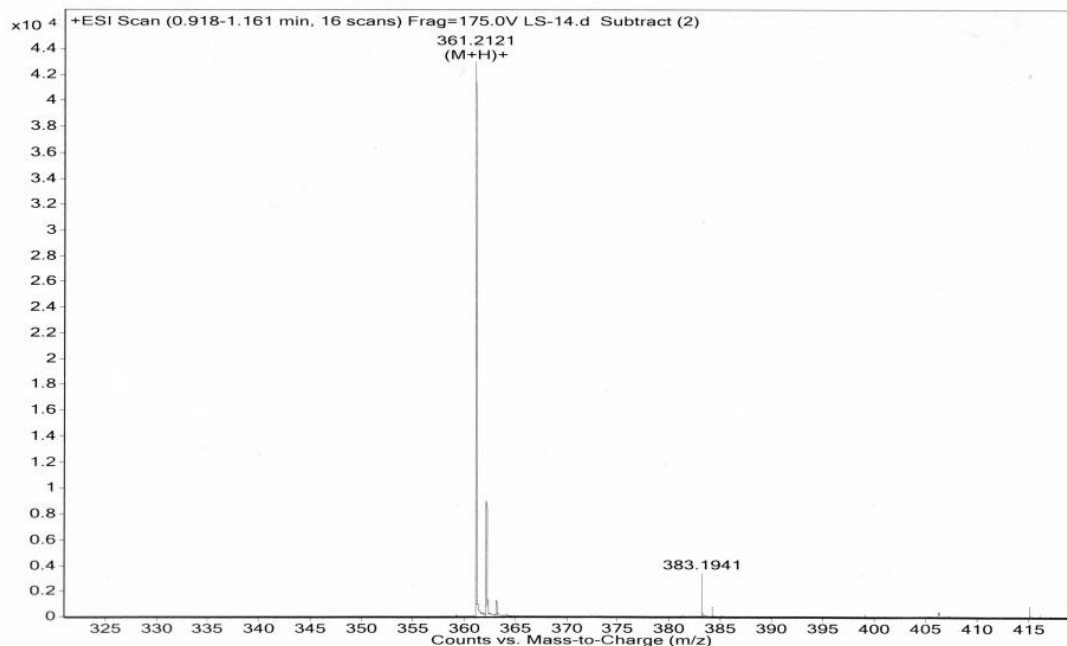

Figure S21. HRMS of compound **14e**

|               |         |             |                |                 |              |                        |                       |
|---------------|---------|-------------|----------------|-----------------|--------------|------------------------|-----------------------|
| Sample Name   | Sample9 | Position    | P1-A9          | Instrument Name | Instrument 1 | User Name              |                       |
| Inj Vol       | -1      | InjPosition |                | SampleType      | Sample       | IRM Calibration Status | Some Ions Missed      |
| Data Filename | LS-15.d | ACQ Method  | Default-TEST.m | Comment         |              | Acquired Time          | 8/28/2018 11:12:49 AM |

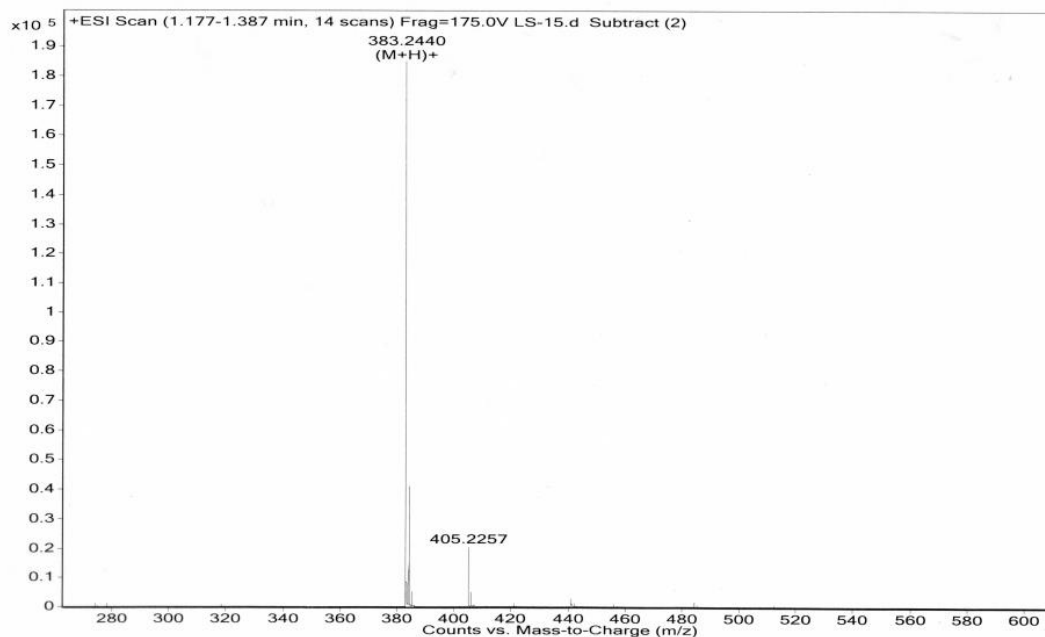

Figure S22. HRMS of compound **15e**

|               |          |             |                |                 |              |                        |                       |
|---------------|----------|-------------|----------------|-----------------|--------------|------------------------|-----------------------|
| Sample Name   | Sample10 | Position    | P1-B1          | Instrument Name | Instrument 1 | User Name              |                       |
| Inj Vol       | -1       | InjPosition |                | SampleType      | Sample       | IRM Calibration Status | Some Ions Missed      |
| Data Filename | LS-16.d  | ACQ Method  | Default-TEST.m | Comment         |              | Acquired Time          | 8/28/2018 11:19:35 AM |

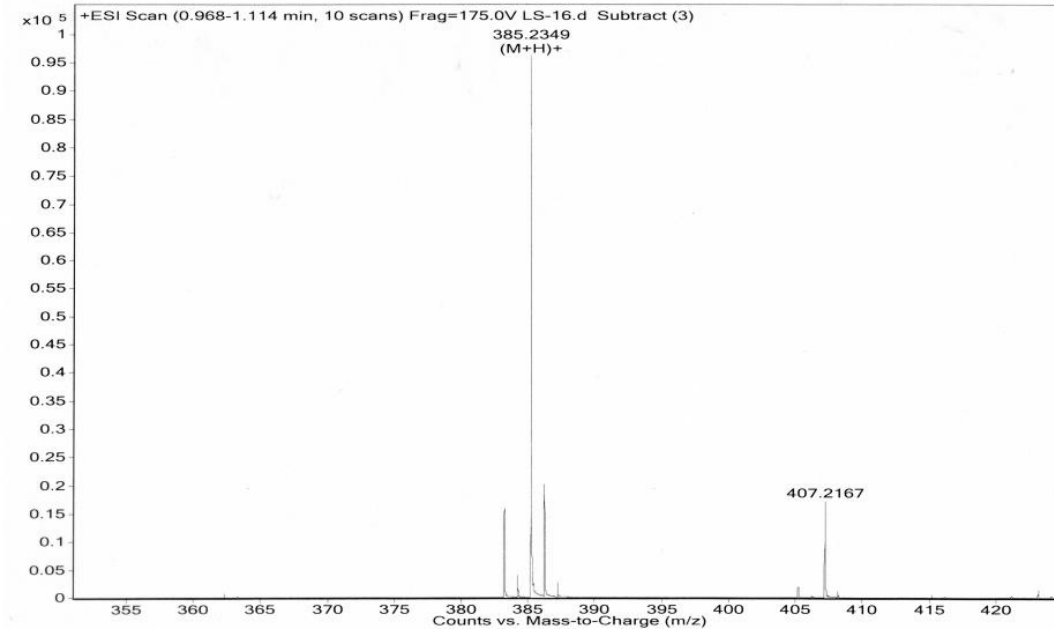

Figure S23. HRMS of compound 16e

|               |          |             |                |                 |              |                        |                       |
|---------------|----------|-------------|----------------|-----------------|--------------|------------------------|-----------------------|
| Sample Name   | Sample40 | Position    | P1-E4          | Instrument Name | Instrument 1 | User Name              |                       |
| Inj Vol       | -1       | InjPosition |                | SampleType      | Sample       | IRM Calibration Status | Some Ions Missed      |
| Data Filename | N1.d     | ACQ Method  | Default-TEST.m | Comment         |              | Acquired Time          | 10/25/2018 7:32:08 PM |

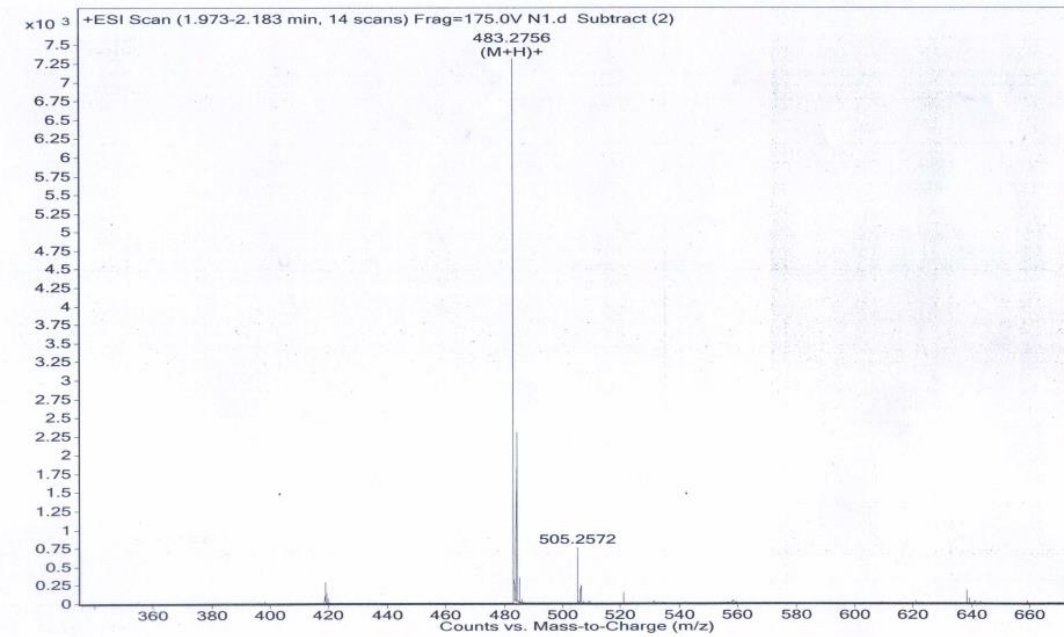

Figure S24. HRMS of compound 17e

|               |          |             |                |                 |              |                        |                       |
|---------------|----------|-------------|----------------|-----------------|--------------|------------------------|-----------------------|
| Sample Name   | Sample41 | Position    | P1-ES          | Instrument Name | Instrument 1 | User Name              |                       |
| Inj Vol       | -1       | InjPosition |                | SampleType      | Sample       | IRM Calibration Status | Some Ions Missed      |
| Data Filename | N03.d    | ACQ Method  | Default-TEST.m | Comment         |              | Acquired Time          | 10/25/2018 7:38:58 PM |

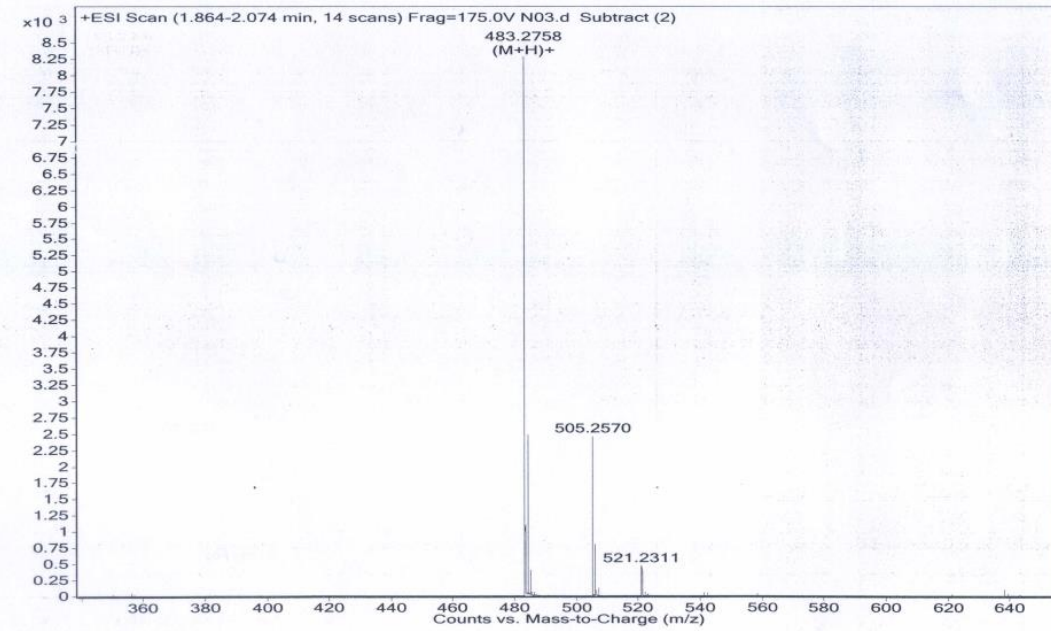

Figure S25. HRMS of compound **18e**

Varian QFT-ESI  
File: N4\_ESI.trans

Mode: Positive  
Scans: 1  
Date: 15-NOV-2018  
Time: 16:09:21  
Scale: 32.5041

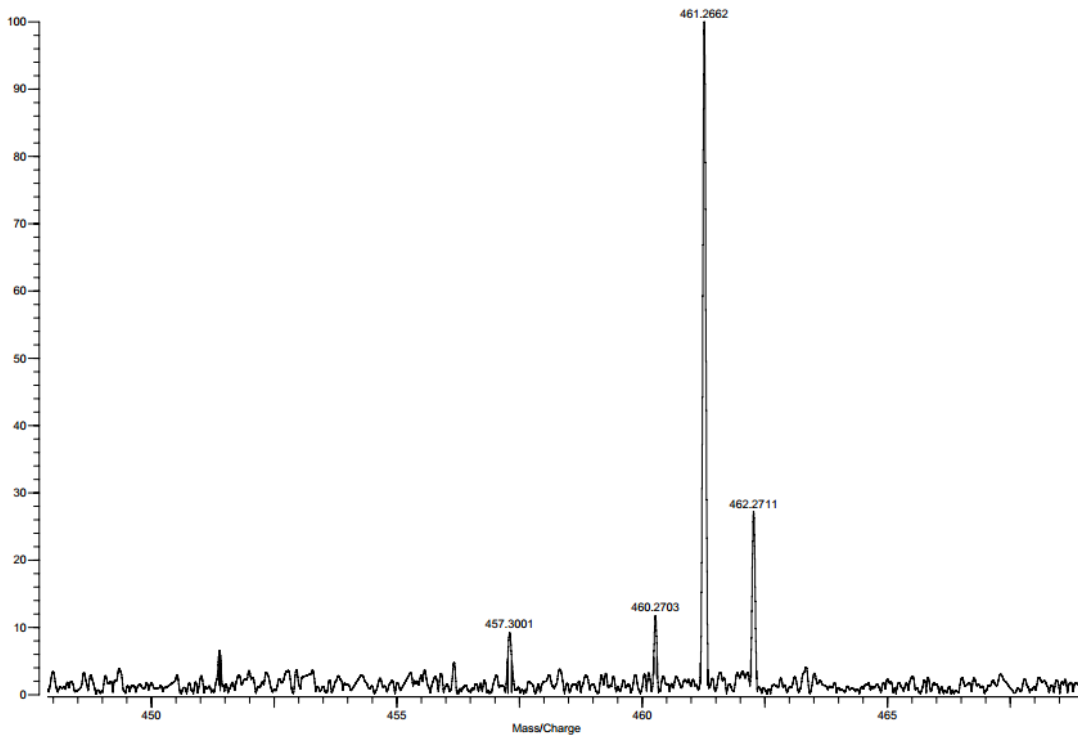

Figure S26. HRMS of compound **19e**

|               |          |             |                |                 |              |                        |                       |
|---------------|----------|-------------|----------------|-----------------|--------------|------------------------|-----------------------|
| Sample Name   | Sample42 | Position    | P1-E6          | Instrument Name | Instrument 1 | User Name              |                       |
| Inj Vol       | -1       | InjPosition |                | SampleType      | Sample       | IRM Calibration Status | Some Ions Missed      |
| Data Filename | N5.d     | ACQ Method  | Default-TEST.m | Comment         |              | Acquired Time          | 10/25/2018 7:45:52 PM |

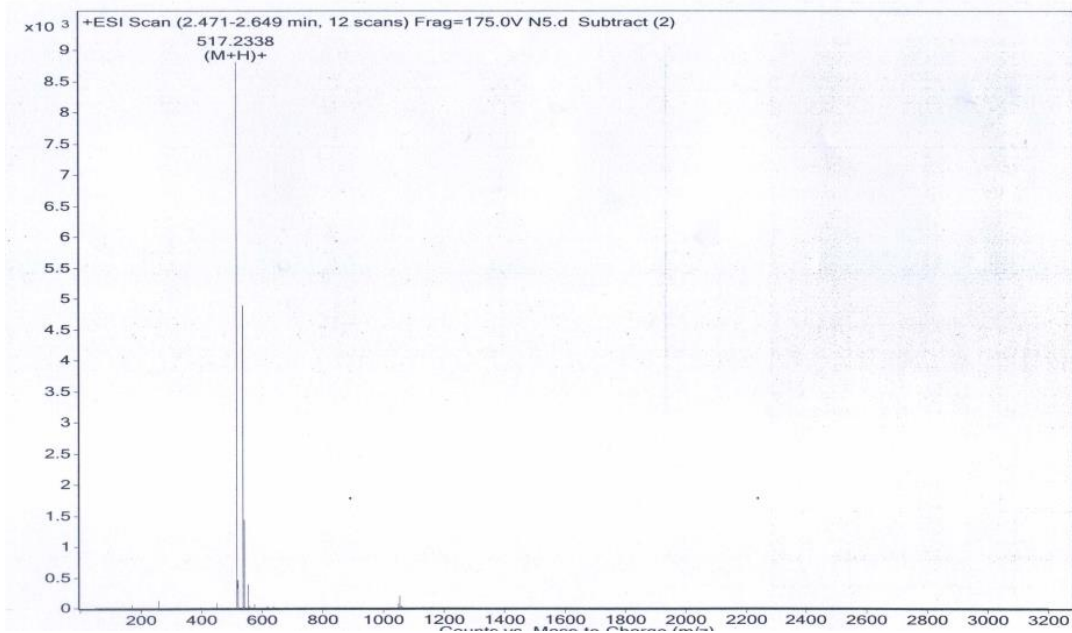

Figure S27. HRMS of compound **20e**

|               |          |             |                |                 |              |                        |                       |
|---------------|----------|-------------|----------------|-----------------|--------------|------------------------|-----------------------|
| Sample Name   | Sample43 | Position    | P1-E7          | Instrument Name | Instrument 1 | User Name              |                       |
| Inj Vol       | -1       | InjPosition |                | SampleType      | Sample       | IRM Calibration Status | Some Ions Missed      |
| Data Filename | N6.d     | ACQ Method  | Default-TEST.m | Comment         |              | Acquired Time          | 10/25/2018 7:52:45 PM |

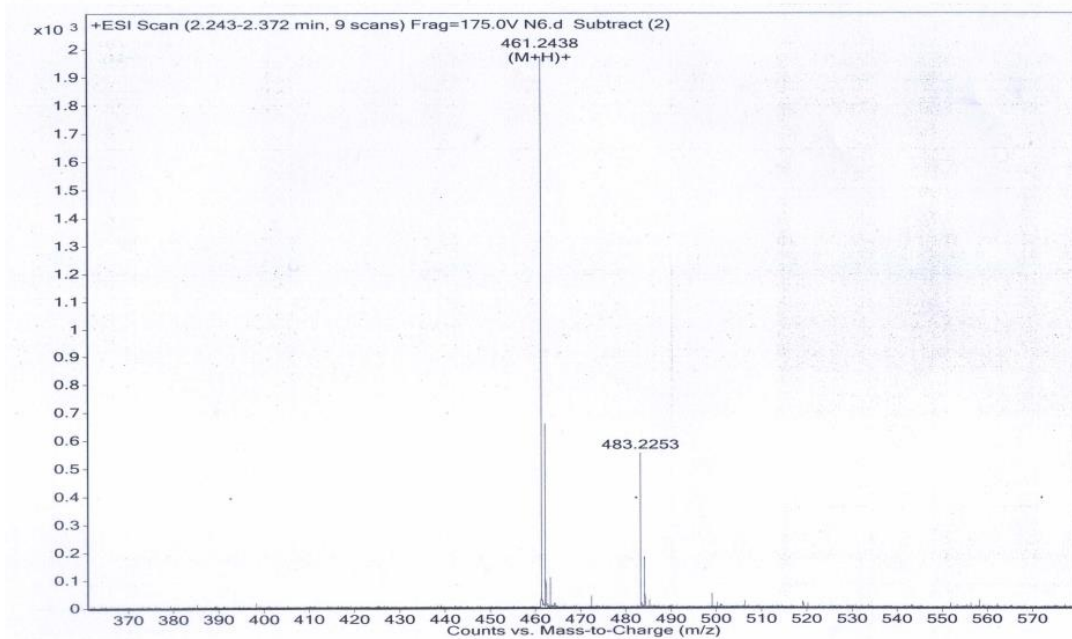

Figure S28. HRMS of compound **21e**

|               |          |             |                |                 |              |                        |                       |
|---------------|----------|-------------|----------------|-----------------|--------------|------------------------|-----------------------|
| Sample Name   | Sample44 | Position    | P1-E8          | Instrument Name | Instrument 1 | User Name              |                       |
| Inj Vol       | -1       | InjPosition |                | SampleType      | Sample       | IRM Calibration Status | Some Ions Missed      |
| Data Filename | N7.d     | ACQ Method  | Default-TEST.m | Comment         |              | Acquired Time          | 10/25/2018 7:59:38 PM |

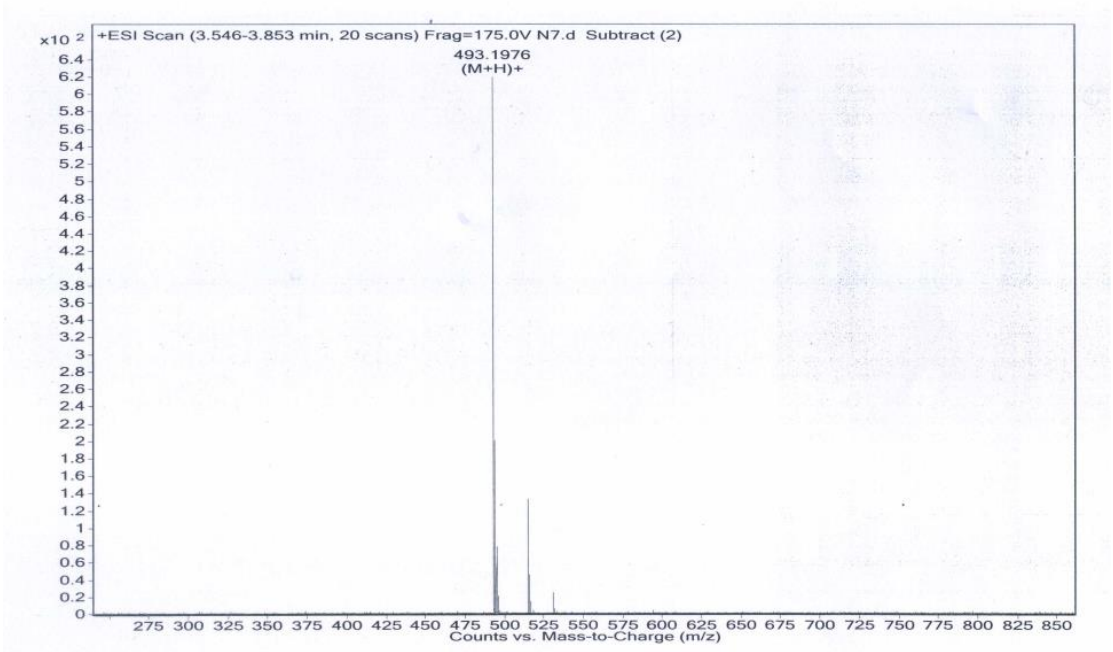

Figure S29. HRMS of compound **22e**

|               |          |             |                |                 |              |                        |                       |
|---------------|----------|-------------|----------------|-----------------|--------------|------------------------|-----------------------|
| Sample Name   | Sample45 | Position    | P1-E9          | Instrument Name | Instrument 1 | User Name              |                       |
| Inj Vol       | -1       | InjPosition |                | SampleType      | Sample       | IRM Calibration Status | Some Ions Missed      |
| Data Filename | N8.d     | ACQ Method  | Default-TEST.m | Comment         |              | Acquired Time          | 10/25/2018 8:06:32 PM |

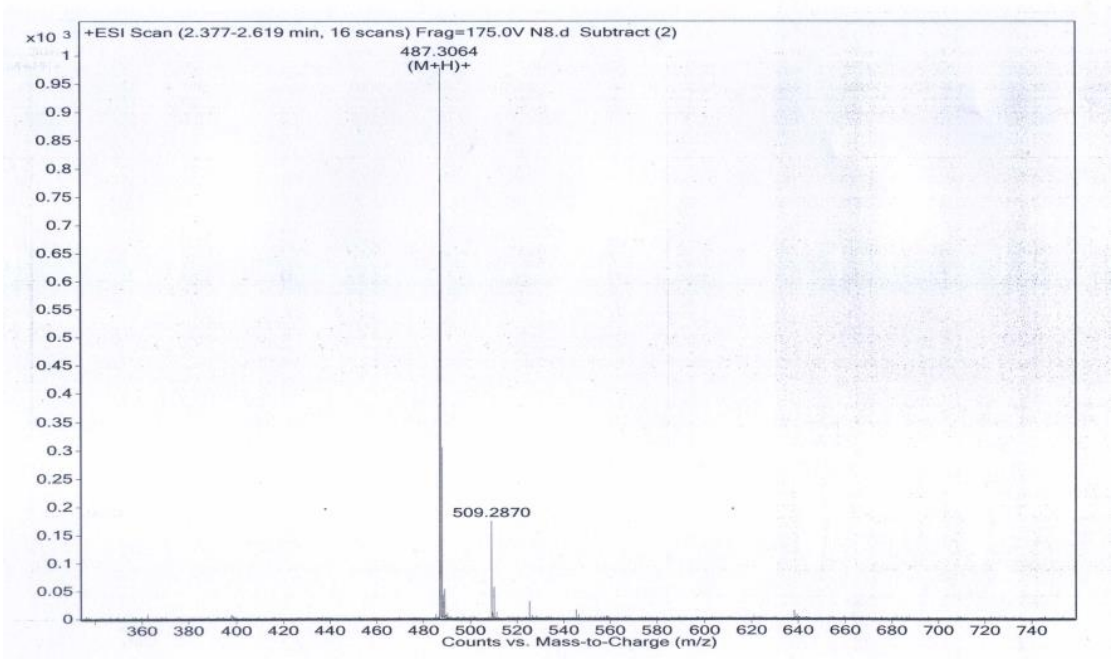

Figure S30. HRMS of compound **23e**

|               |          |             |                |                 |              |                        |                       |
|---------------|----------|-------------|----------------|-----------------|--------------|------------------------|-----------------------|
| Sample Name   | Sample46 | Position    | P1-F1          | Instrument Name | Instrument 1 | User Name              |                       |
| Inj Vol       | -1       | InjPosition |                | SampleType      | Sample       | IRM Calibration Status | Some Ions Missed      |
| Data Filename | N9.d     | ACQ Method  | Default-TEST.m | Comment         |              | Acquired Time          | 10/25/2018 8:13:25 PM |

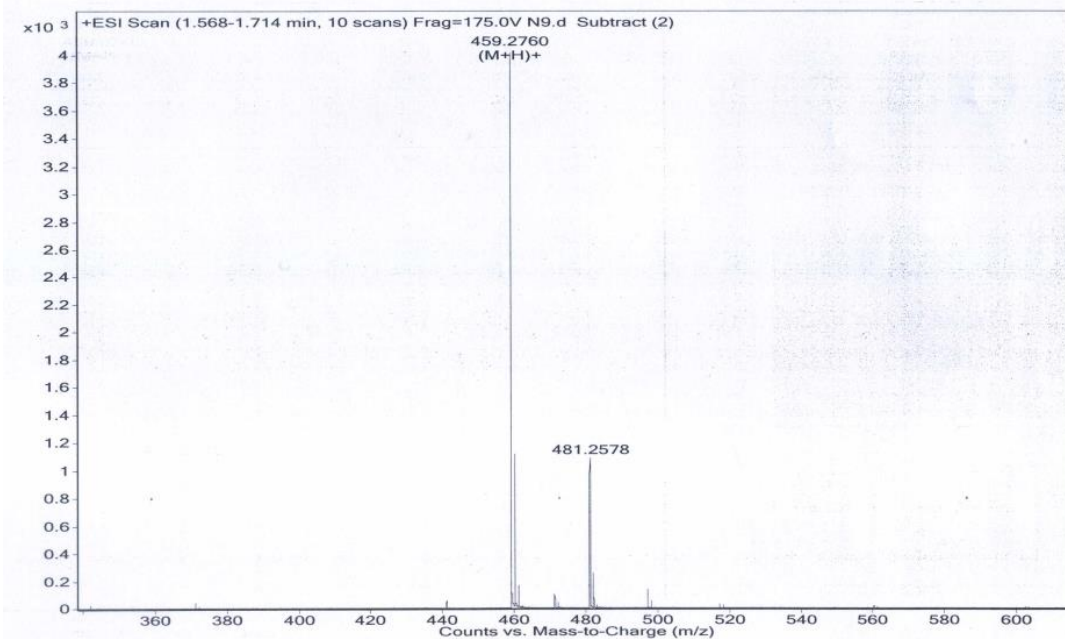

Figure S31. HRMS of compound **24e**

|               |          |             |                |                 |              |                        |                       |
|---------------|----------|-------------|----------------|-----------------|--------------|------------------------|-----------------------|
| Sample Name   | Sample12 | Position    | P1-C5          | Instrument Name | Instrument 1 | User Name              |                       |
| Inj Vol       | -1       | InjPosition |                | SampleType      | Sample       | IRM Calibration Status | Some Ions Missed      |
| Data Filename | R2.d     | ACQ Method  | Default-TEST.m | Comment         |              | Acquired Time          | 10/29/2018 6:53:01 PM |

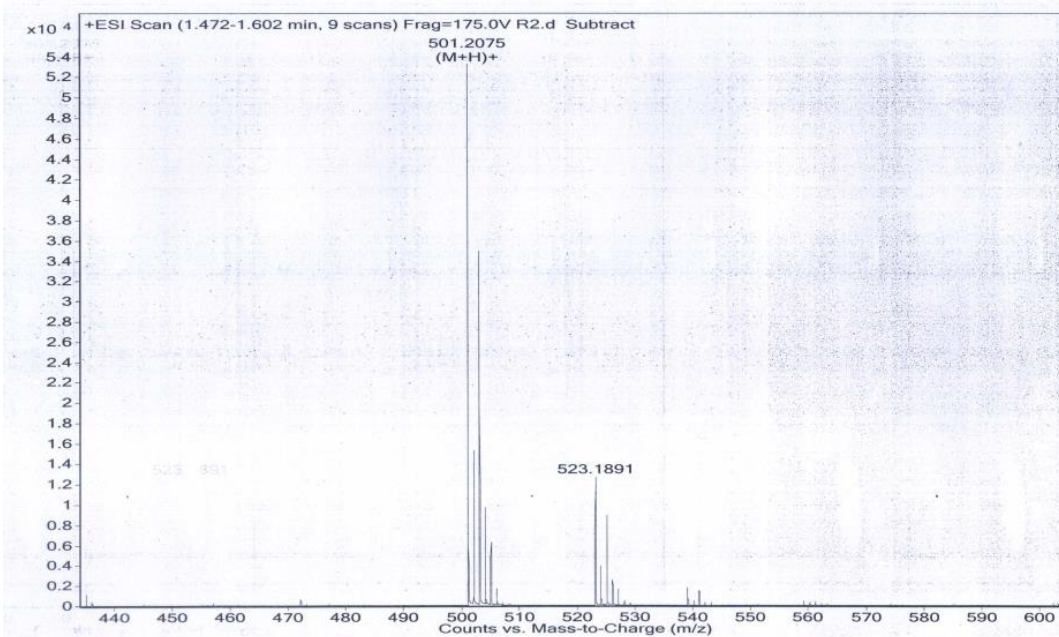

Figure S32. HRMS of compound **25e**



|               |         |             |                |                 |              |                        |                       |
|---------------|---------|-------------|----------------|-----------------|--------------|------------------------|-----------------------|
| Sample Name   | Sample3 | Position    | P1-A3          | Instrument Name | Instrument 1 | User Name              |                       |
| Inj Vol       | -1      | InjPosition |                | SampleType      | Sample       | IRM Calibration Status | Some Ions Missed      |
| Data Filename | LS-R5.d | ACQ Method  | Default-TEST.m | Comment         |              | Acquired Time          | 11/2/2018 11:18:11 AM |

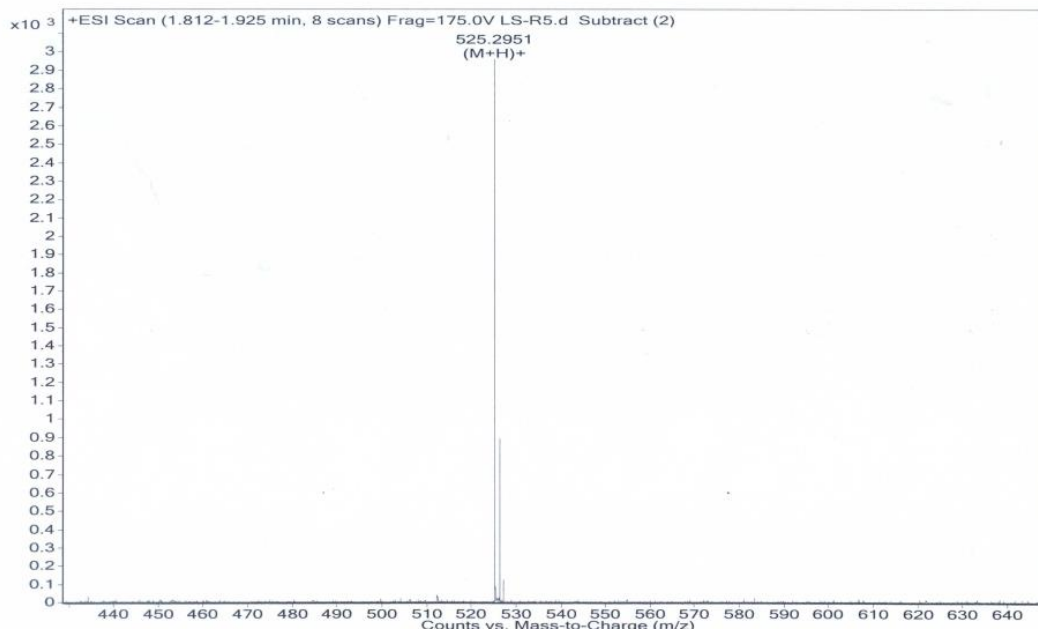

Figure S33. HRMS of compound **26e**

|               |          |             |                |                 |              |                        |                       |
|---------------|----------|-------------|----------------|-----------------|--------------|------------------------|-----------------------|
| Sample Name   | Sample12 | Position    | P1-C6          | Instrument Name | Instrument 1 | User Name              |                       |
| Inj Vol       | -1       | InjPosition |                | SampleType      | Sample       | IRM Calibration Status | Some Ions Missed      |
| Data Filename | R6.d     | ACQ Method  | Default-TEST.m | Comment         |              | Acquired Time          | 10/29/2018 6:59:54 PM |

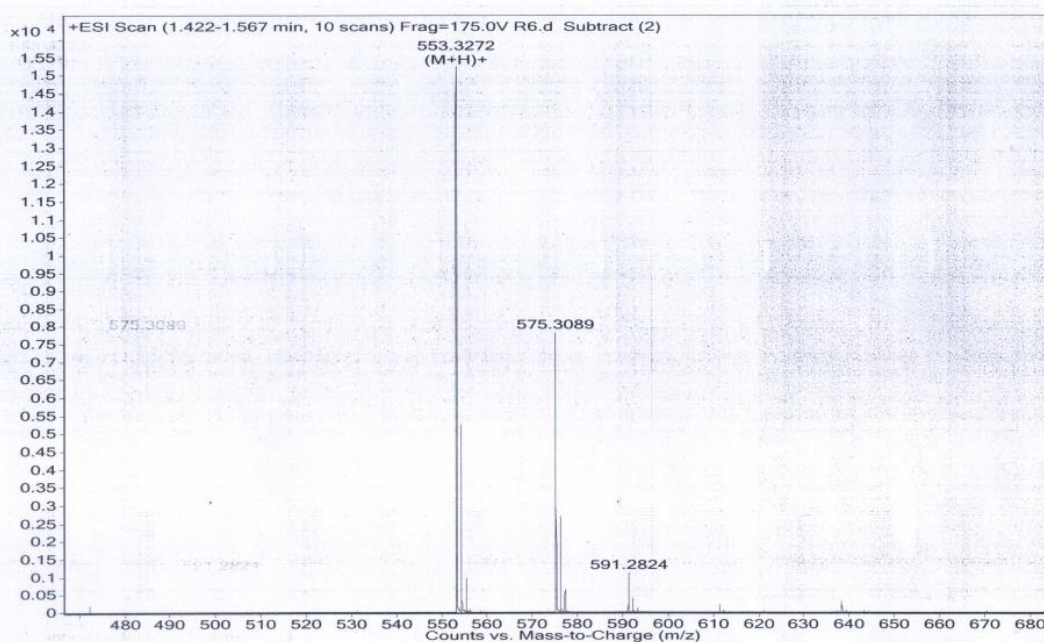

Figure S34. HRMS of compound **27e**

|               |         |             |                |                 |              |                        |                       |
|---------------|---------|-------------|----------------|-----------------|--------------|------------------------|-----------------------|
| Sample Name   | Sample4 | Position    | P1-A4          | Instrument Name | Instrument 1 | User Name              |                       |
| Inj Vol       | -1      | InjPosition |                | SampleType      | Sample       | IRM Calibration Status | Some Ions Missed      |
| Data Filename | LS-R7.d | ACQ Method  | Default-TEST.m | Comment         |              | Acquired Time          | 11/2/2018 11:25:01 AM |

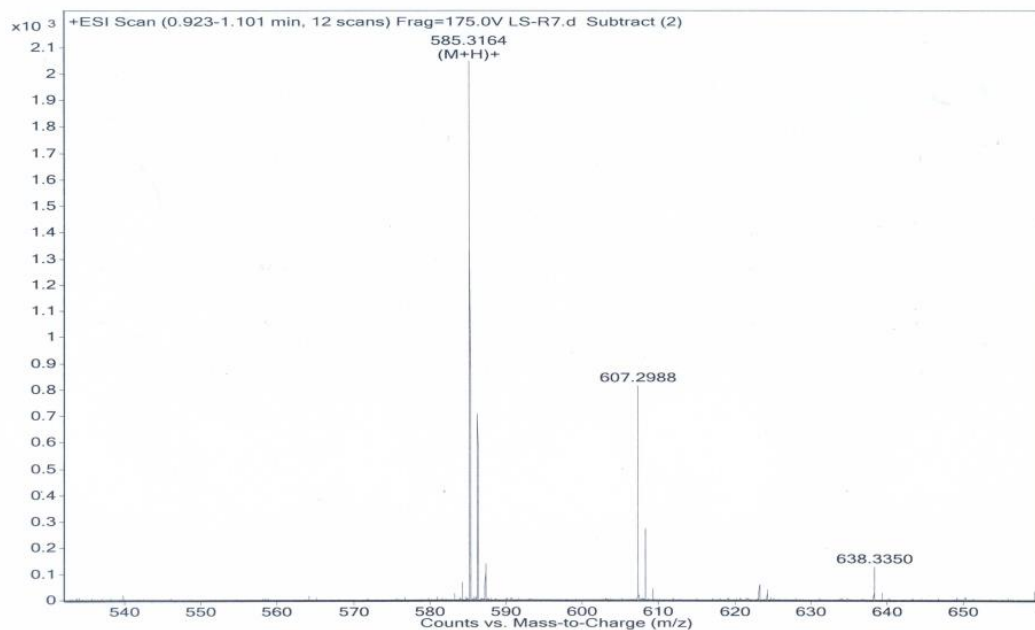

Figure S35. HRMS of compound **28e**

|               |          |             |                |                 |              |                        |                      |
|---------------|----------|-------------|----------------|-----------------|--------------|------------------------|----------------------|
| Sample Name   | Sample13 | Position    | P1-C7          | Instrument Name | Instrument 1 | User Name              |                      |
| Inj Vol       | -1       | InjPosition |                | SampleType      | Sample       | IRM Calibration Status | Some Ions Missed     |
| Data Filename | R8.d     | ACQ Method  | Default-TEST.m | Comment         |              | Acquired Time          | 10/29/2018 7:06:48 F |

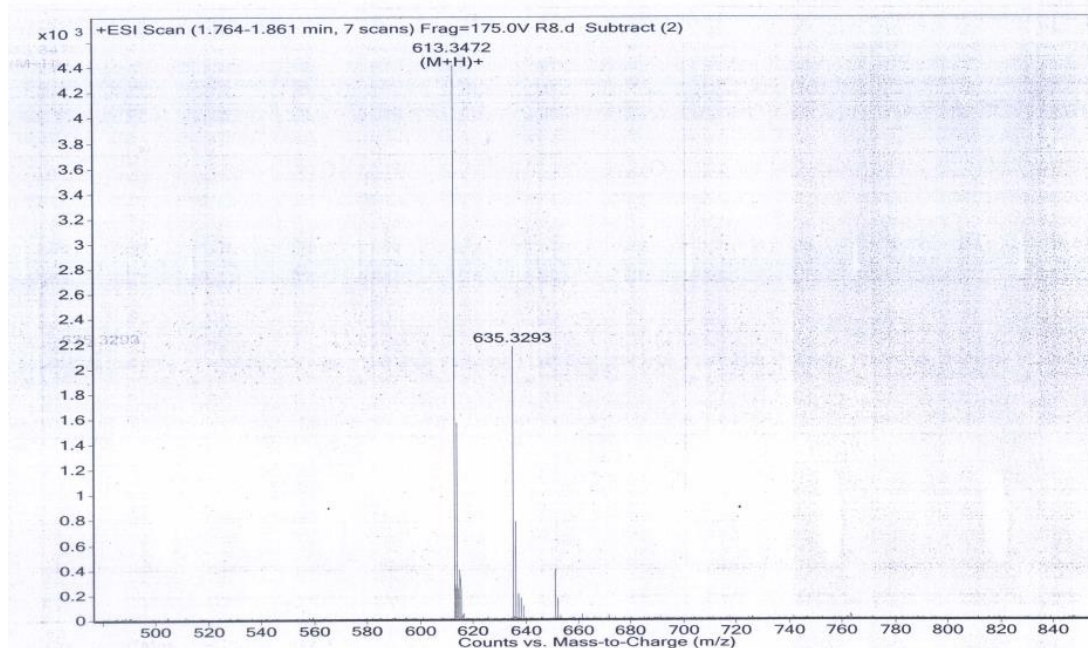

Figure S36. HRMS of compound **29e**

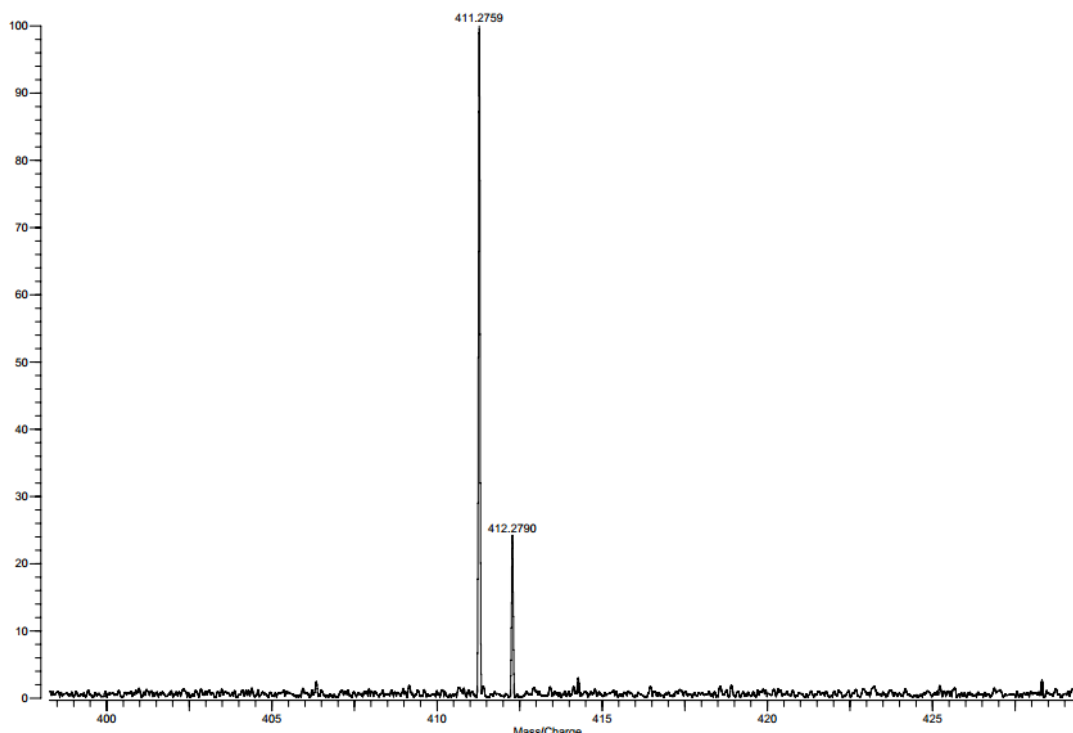

Figure S37. HRMS of compound **30e**

|               |         |             |                |                 |              |                        |                       |
|---------------|---------|-------------|----------------|-----------------|--------------|------------------------|-----------------------|
| Sample Name   | Sample2 | Position    | P1-A2          | Instrument Name | Instrument 1 | User Name              |                       |
| Inj Vol       | -1      | InjPosition |                | SampleType      | Sample       | IRM Calibration Status | Some Ions Missed      |
| Data Filename | LS-B2.d | ACQ Method  | Default-TEST.m | Comment         |              | Acquired Time          | 11/2/2018 11:11:19 AM |

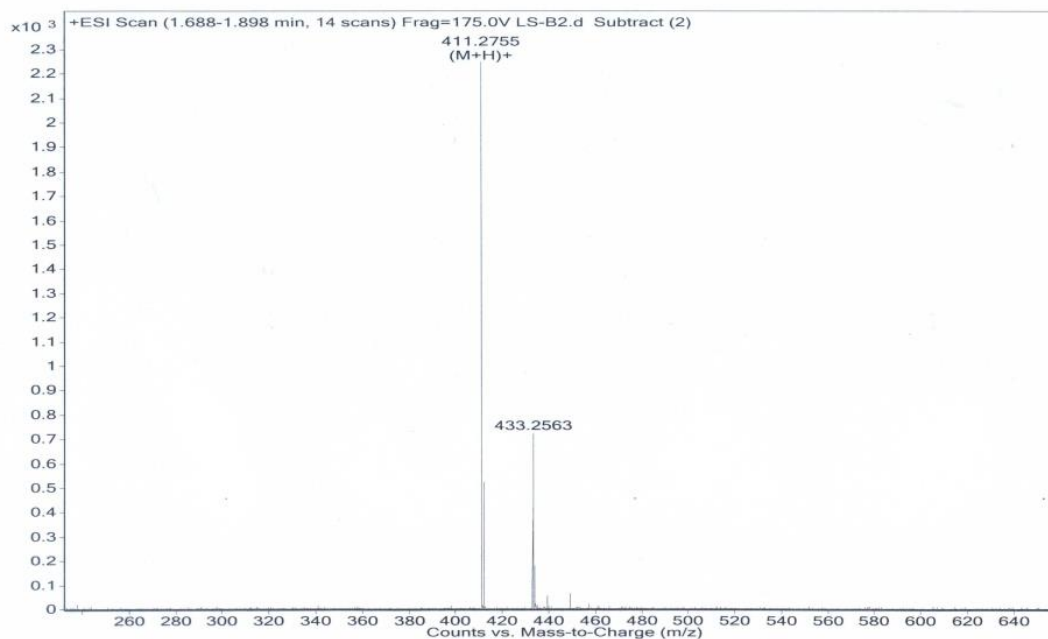

Figure S38. HRMS of compound **31e**

|               |          |             |                |                 |              |                        |                       |
|---------------|----------|-------------|----------------|-----------------|--------------|------------------------|-----------------------|
| Sample Name   | Sample14 | Position    | P1-D1          | Instrument Name | Instrument 1 | User Name              |                       |
| Inj Vol       | -1       | InjPosition |                | SampleType      | Sample       | IRM Calibration Status | Some Ions Missed      |
| Data Filename | B03.d    | ACQ Method  | Default-TEST.m | Comment         |              | Acquired Time          | 10/29/2018 7:27:27 PM |

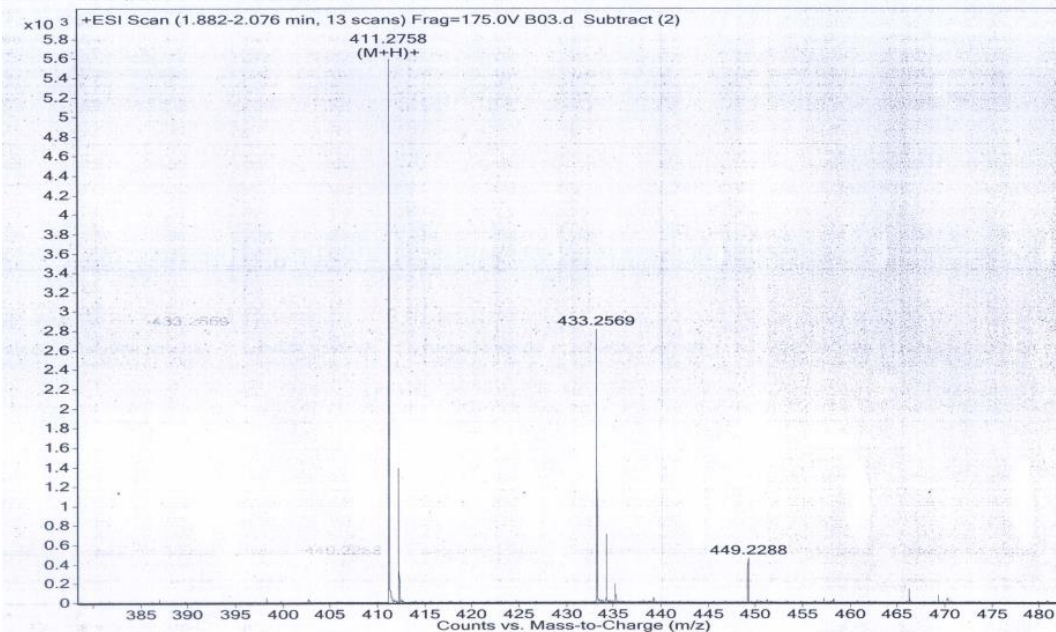

Figure S39. HRMS of compound **32e**

|               |          |             |                |                 |              |                        |                       |
|---------------|----------|-------------|----------------|-----------------|--------------|------------------------|-----------------------|
| Sample Name   | Sample15 | Position    | P1-D2          | Instrument Name | Instrument 1 | User Name              |                       |
| Inj Vol       | -1       | InjPosition |                | SampleType      | Sample       | IRM Calibration Status | Some Ions Missed      |
| Data Filename | B006.d   | ACQ Method  | Default-TEST.m | Comment         |              | Acquired Time          | 10/29/2018 7:34:22 PM |

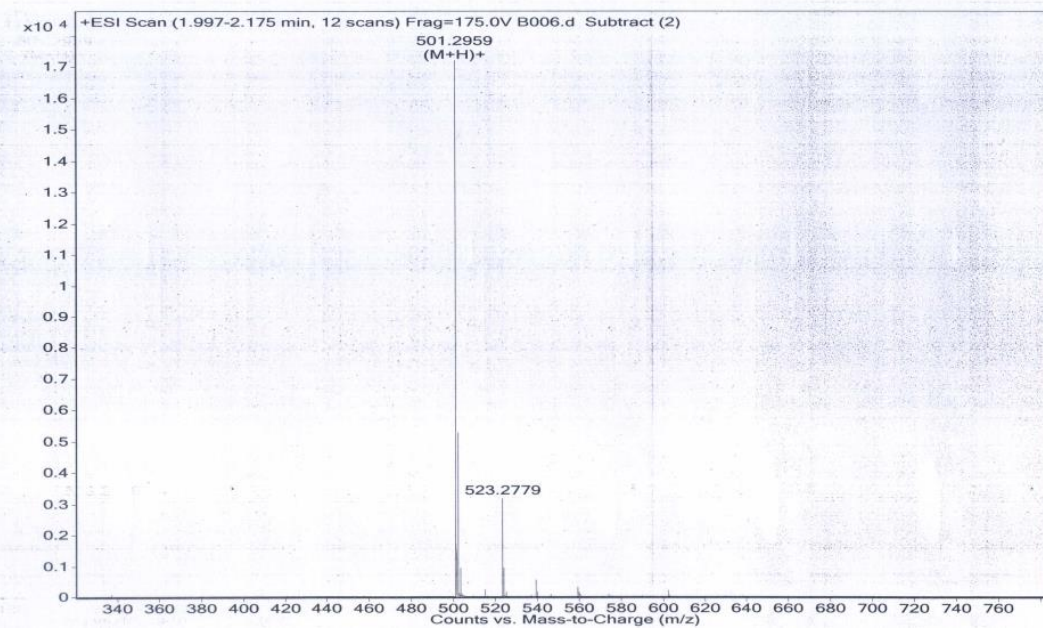

Figure S40. HRMS of compound **33e**

|               |          |             |                |                 |              |                        |                                           |
|---------------|----------|-------------|----------------|-----------------|--------------|------------------------|-------------------------------------------|
| Sample Name   | Sample15 | Position    | P1-D3          | Instrument Name | Instrument 1 | User Name              | Some Ions Missed<br>10/29/2018 7:41:14 PM |
| Inj Vol       | -1       | InjPosition |                | SampleType      | Sample       | IRM Calibration Status |                                           |
| Data Filename | B08.d    | ACQ Method  | Default-TEST.m | Comment         |              | Acquired Time          |                                           |

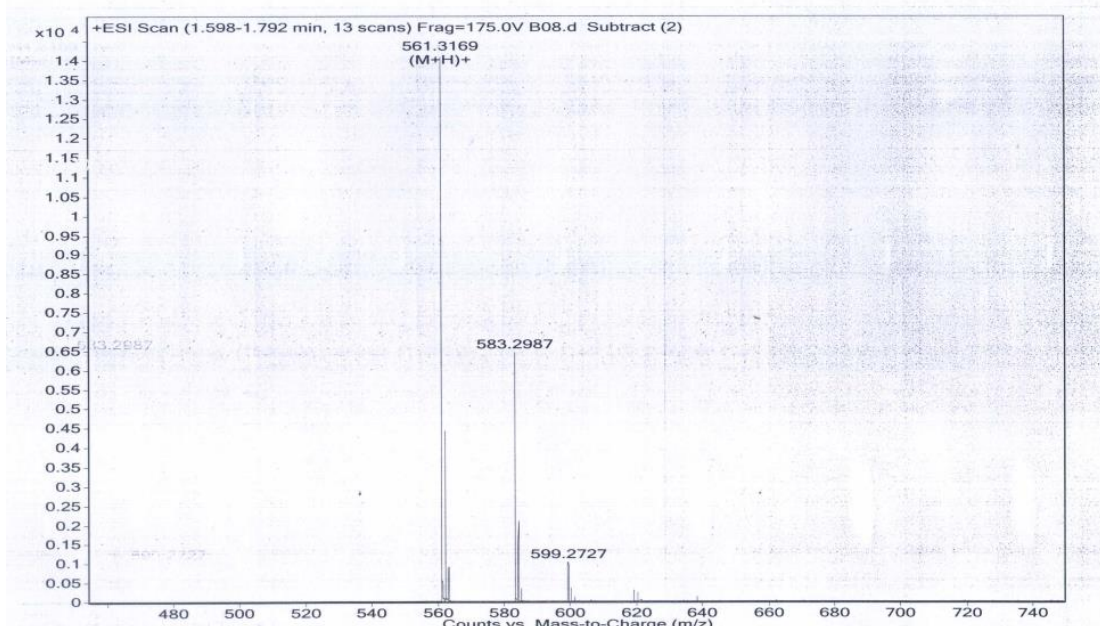

Figure S41. HRMS of compound **34e**

|               |          |             |                |                 |              |                        |                                           |
|---------------|----------|-------------|----------------|-----------------|--------------|------------------------|-------------------------------------------|
| Sample Name   | Sample16 | Position    | P1-D4          | Instrument Name | Instrument 1 | User Name              | Some Ions Missed<br>10/29/2018 7:48:09 PM |
| Inj Vol       | -1       | InjPosition |                | SampleType      | Sample       | IRM Calibration Status |                                           |
| Data Filename | B09.d    | ACQ Method  | Default-TEST.m | Comment         |              | Acquired Time          |                                           |

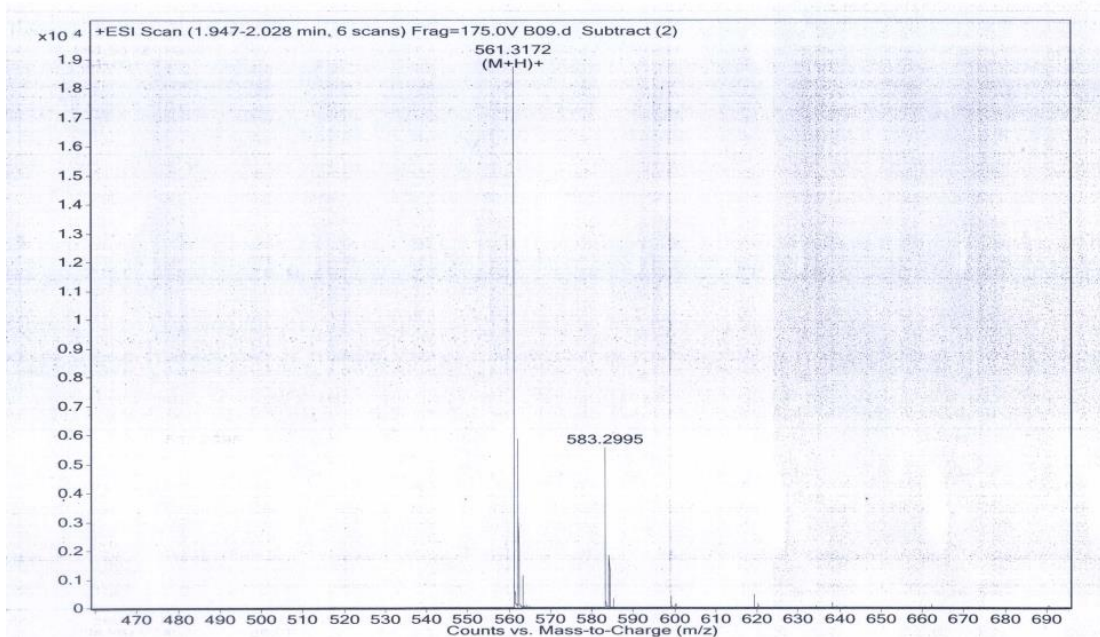

Figure S42. HRMS of compound **35e**

|               |         |             |                |                 |              |                        |                       |
|---------------|---------|-------------|----------------|-----------------|--------------|------------------------|-----------------------|
| Sample Name   | Sample1 | Position    | P1-A1          | Instrument Name | Instrument 1 | User Name              |                       |
| Inj Vol       | -1      | InjPosition |                | SampleType      | Sample       | IRM Calibration Status | Some Ions Missed      |
| Data Filename | LS-L8.d | ACQ Method  | Default-TEST.m | Comment         |              | Acquired Time          | 11/2/2018 11:04:27 AM |

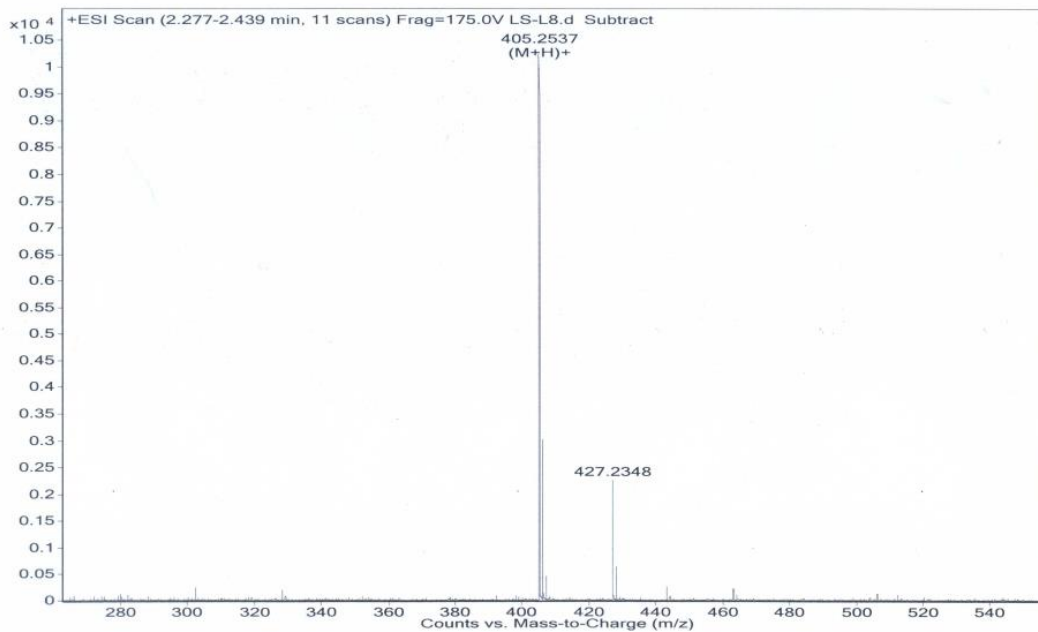

Figure S43. HRMS of compound **9d**

|               |          |             |                |                 |              |                        |                       |
|---------------|----------|-------------|----------------|-----------------|--------------|------------------------|-----------------------|
| Sample Name   | Sample10 | Position    | P1-C2          | Instrument Name | Instrument 1 | User Name              |                       |
| Inj Vol       | -1       | InjPosition |                | SampleType      | Sample       | IRM Calibration Status | Some Ions Missed      |
| Data Filename | L009.d   | ACQ Method  | Default-TEST.m | Comment         |              | Acquired Time          | 10/29/2018 6:32:23 PM |

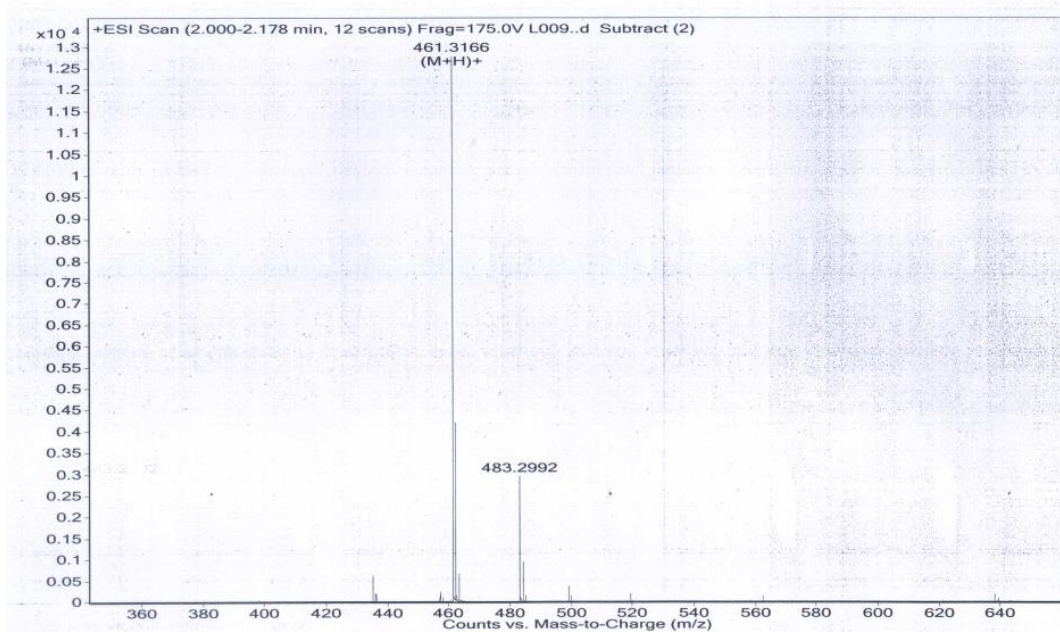

Figure S44. HRMS of compound **9f**

|               |          |             |                |                 |              |                        |                       |
|---------------|----------|-------------|----------------|-----------------|--------------|------------------------|-----------------------|
| Sample Name   | Sample11 | Position    | P1-C3          | Instrument Name | Instrument 1 | User Name              |                       |
| Inj Vol       | -1       | InjPosition |                | SampleType      | Sample       | IRM Calibration Status | Some Ions Missed      |
| Data Filename | L010.d   | ACQ Method  | Default-TEST.m | Comment         |              | Acquired Time          | 10/29/2018 6:39:15 PM |

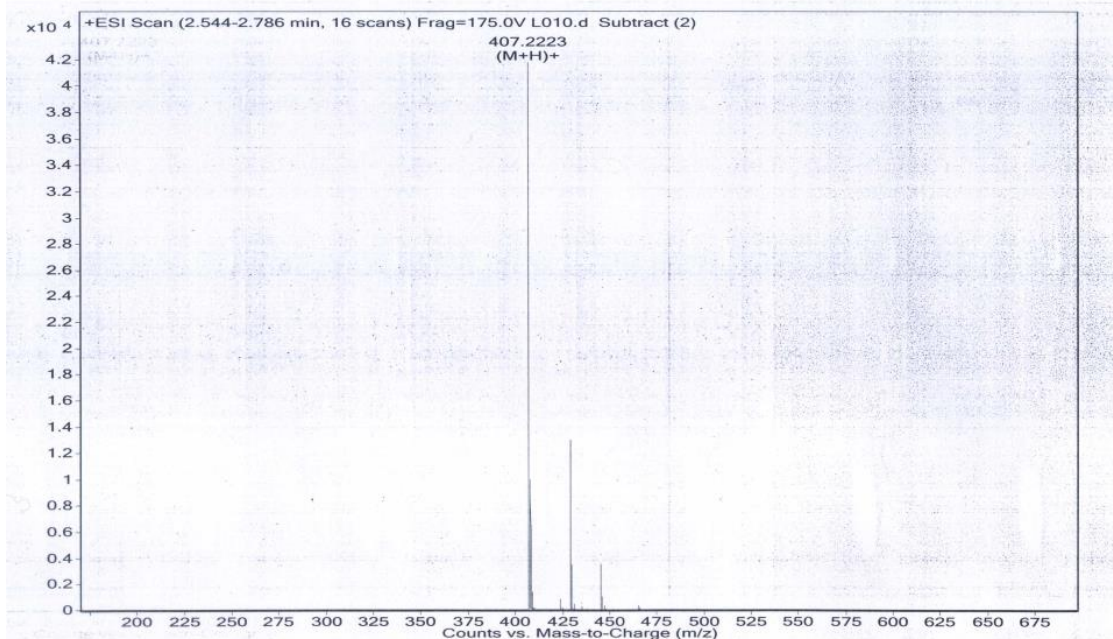

Figure S45. HRMS of compound **9g**

|               |         |             |                |                 |              |                        |                       |
|---------------|---------|-------------|----------------|-----------------|--------------|------------------------|-----------------------|
| Sample Name   | Sample8 | Position    | P1-B6          | Instrument Name | Instrument 1 | User Name              |                       |
| Inj Vol       | -1      | InjPosition |                | SampleType      | Sample       | IRM Calibration Status | Some Ions Missed      |
| Data Filename | L01.d   | ACQ Method  | Default-TEST.m | Comment         |              | Acquired Time          | 10/29/2018 5:57:56 PM |

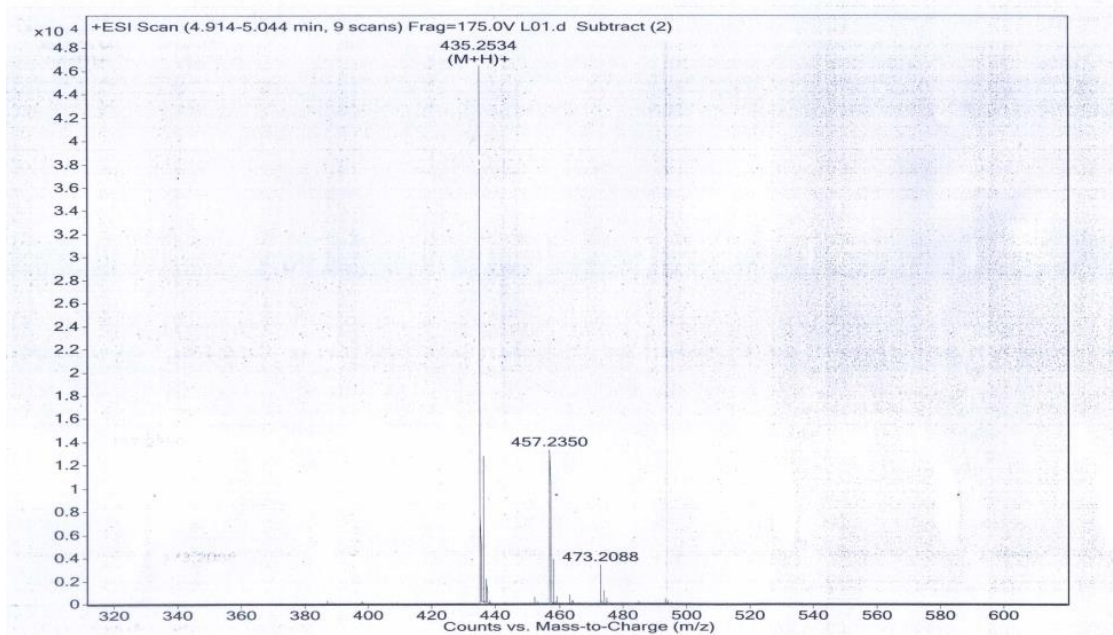

Figure S46. HRMS of compound **9h**

|               |          |             |                |                 |              |                        |                       |
|---------------|----------|-------------|----------------|-----------------|--------------|------------------------|-----------------------|
| Sample Name   | Sample11 | Position    | P1-C4          | Instrument Name | Instrument 1 | User Name              |                       |
| Inj Vol       | -1       | InjPosition |                | SampleType      | Sample       | IRM Calibration Status | Some Ions Missed      |
| Data Filename | L011.d   | ACQ Method  | Default-TEST.m | Comment         |              | Acquired Time          | 10/29/2018 6:46:08 PM |

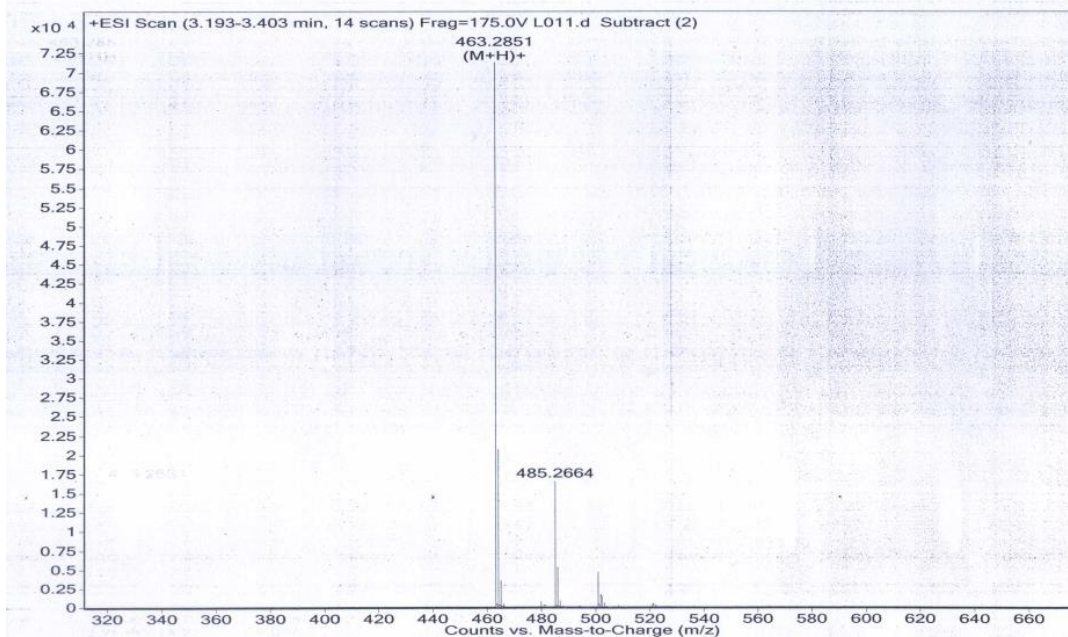

Figure S47. HRMS of compound **9i**

|               |         |             |                |                 |              |                        |                       |
|---------------|---------|-------------|----------------|-----------------|--------------|------------------------|-----------------------|
| Sample Name   | Sample9 | Position    | P1-B9          | Instrument Name | Instrument 1 | User Name              |                       |
| Inj Vol       | -1      | InjPosition |                | SampleType      | Sample       | IRM Calibration Status | Some Ions Missed      |
| Data Filename | L04.d   | ACQ Method  | Default-TEST.m | Comment         |              | Acquired Time          | 10/29/2018 6:18:35 PM |

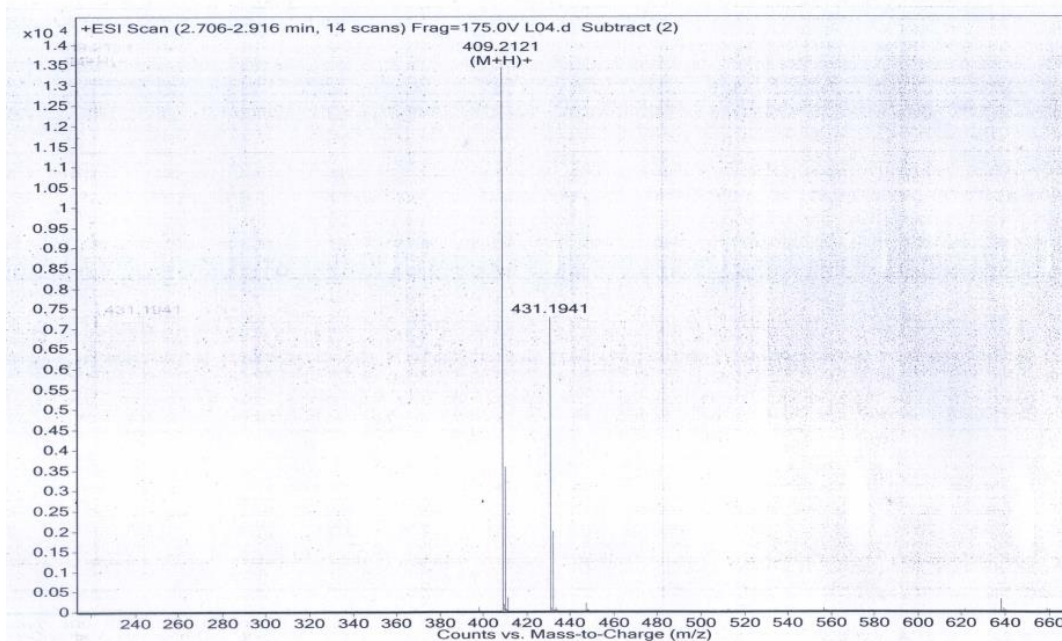

Figure S48. HRMS of compound **9j**



|               |         |             |                |                 |              |                        |                       |
|---------------|---------|-------------|----------------|-----------------|--------------|------------------------|-----------------------|
| Sample Name   | Sample1 | Position    | P1-A1          | Instrument Name | Instrument 1 | User Name              |                       |
| Inj Vol       | -1      | InjPosition |                | SampleType      | Sample       | IRM Calibration Status | Some Ions Missed      |
| Data Filename | L05.d   | ACQ Method  | Default-TEST.m | Comment         |              | Acquired Time          | 11/12/2018 4:52:01 PM |

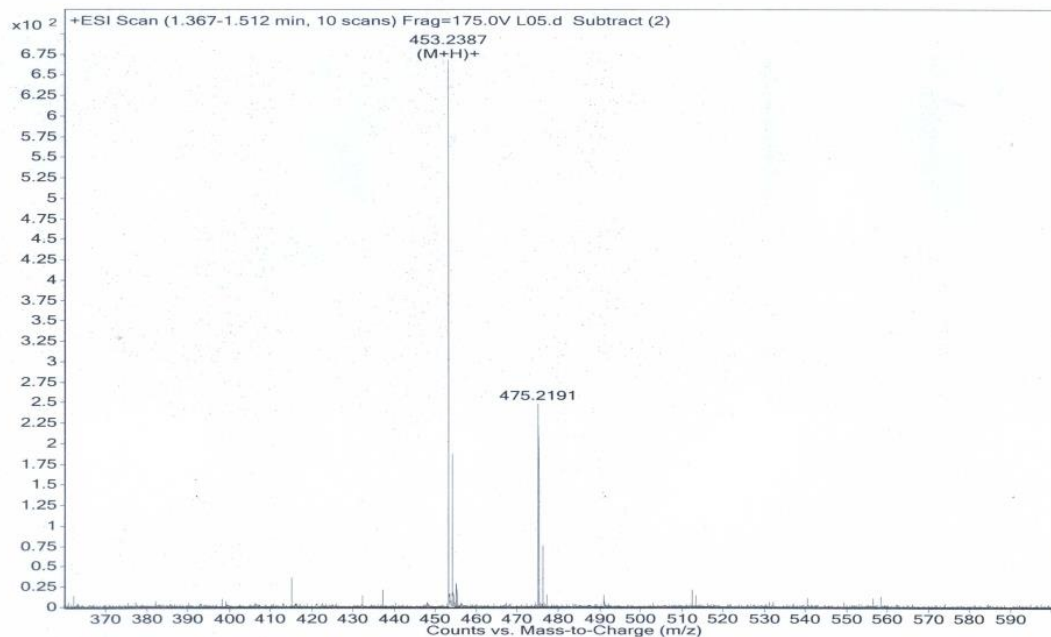

Figure S49. HRMS of compound **9k**

|               |         |             |                |                 |              |                        |                       |
|---------------|---------|-------------|----------------|-----------------|--------------|------------------------|-----------------------|
| Sample Name   | Sample8 | Position    | P1-B7          | Instrument Name | Instrument 1 | User Name              |                       |
| Inj Vol       | -1      | InjPosition |                | SampleType      | Sample       | IRM Calibration Status | Some Ions Missed      |
| Data Filename | L02.d   | ACQ Method  | Default-TEST.m | Comment         |              | Acquired Time          | 10/29/2018 6:04:49 PM |

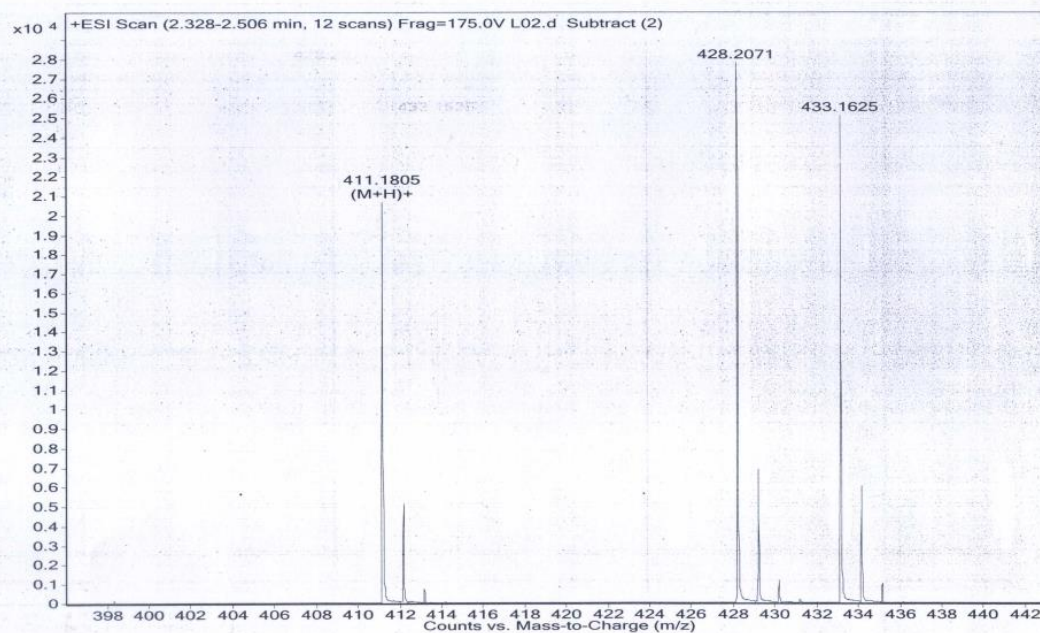

Figure S50. HRMS of compound **9l**

|               |         |             |                |                 |              |                        |                       |
|---------------|---------|-------------|----------------|-----------------|--------------|------------------------|-----------------------|
| Sample Name   | Sample9 | Position    | P1-B8          | Instrument Name | Instrument 1 | User Name              |                       |
| Inj Vol       | -1      | InjPosition |                | SampleType      | Sample       | IRM Calibration Status | Some Ions Missed      |
| Data Filename | L03.d   | ACQ Method  | Default-TEST.m | Comment         |              | Acquired Time          | 10/29/2018 6:11:42 PM |

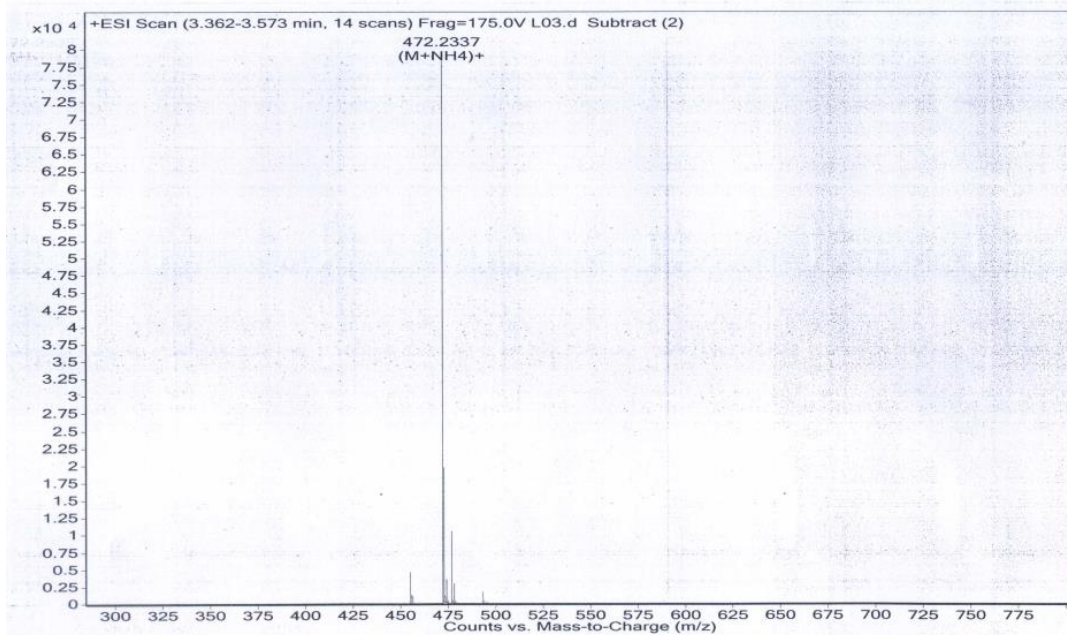

Figure S51. HRMS of compound **9m**

<sup>1</sup>H-NMR

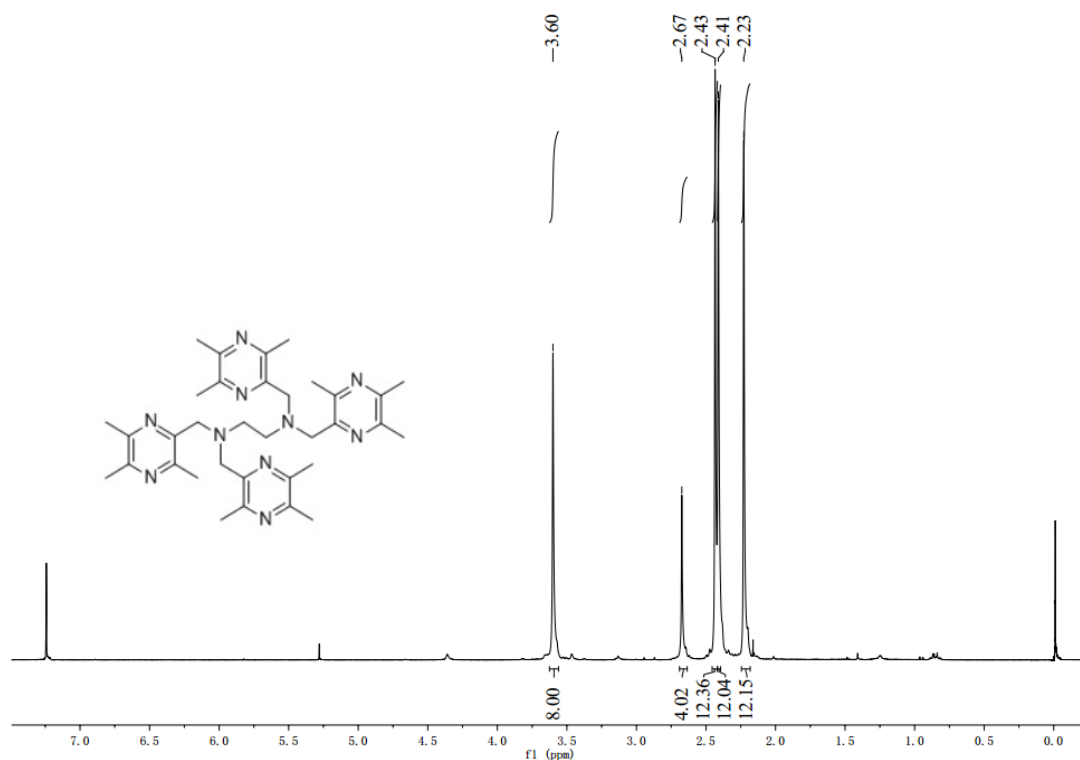

Figure S52 <sup>1</sup>H NMR spectrum of compound **6a**.

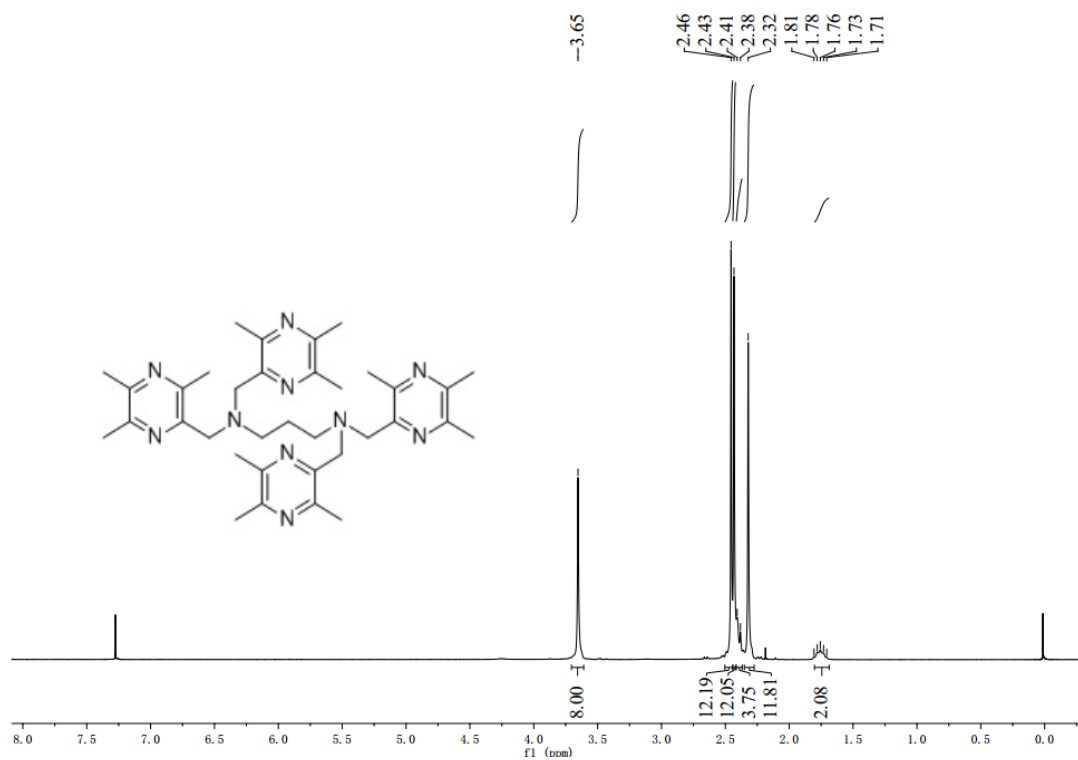

Figure S53  $^1\text{H}$  NMR spectrum of compound **6b**.

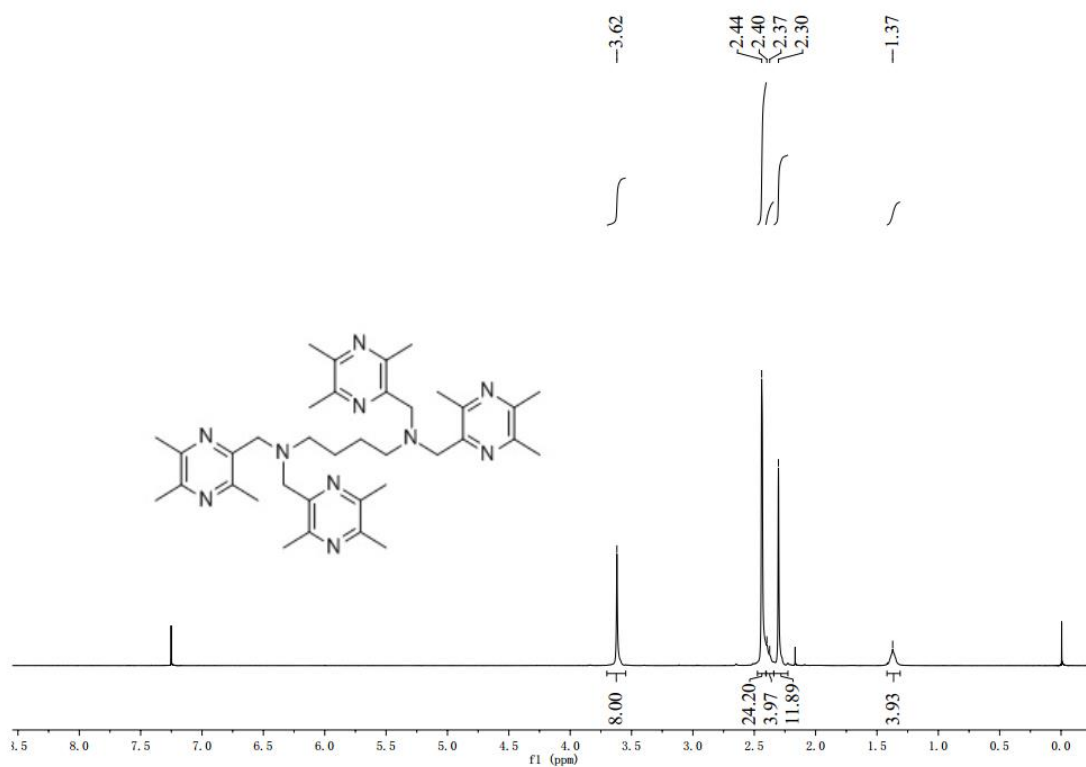

Figure S54  $^1\text{H}$  NMR spectrum of compound **6c**.

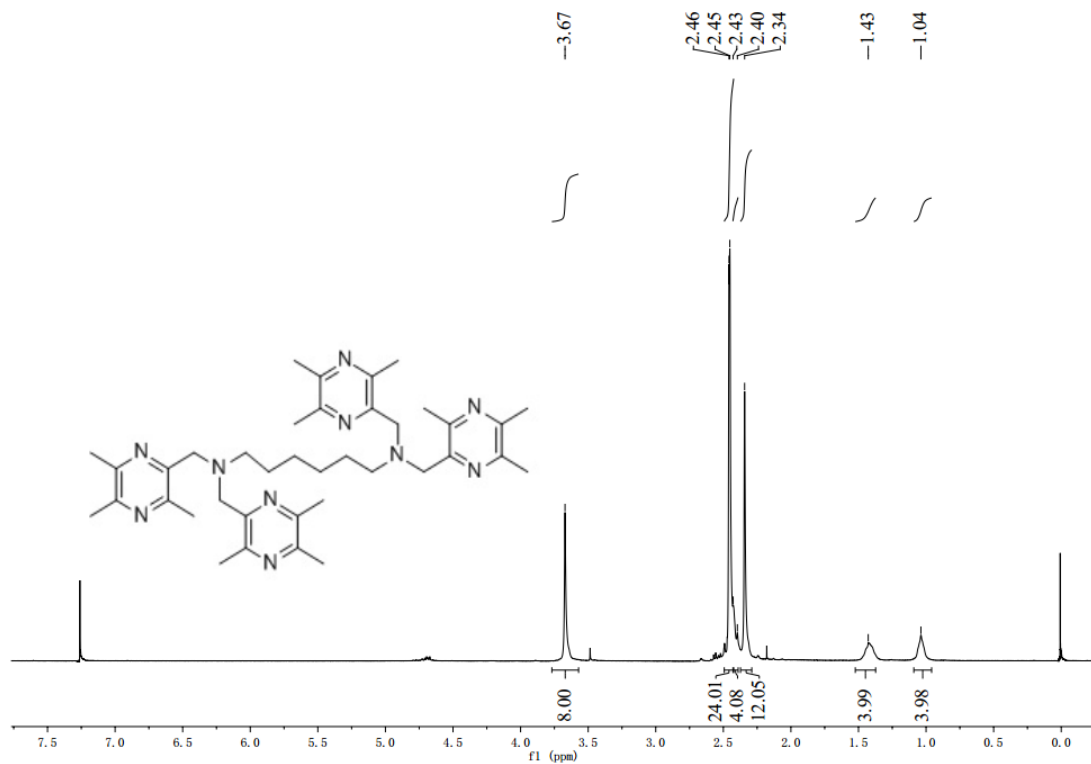

Figure S55 <sup>1</sup>H NMR spectrum of compound 6d.

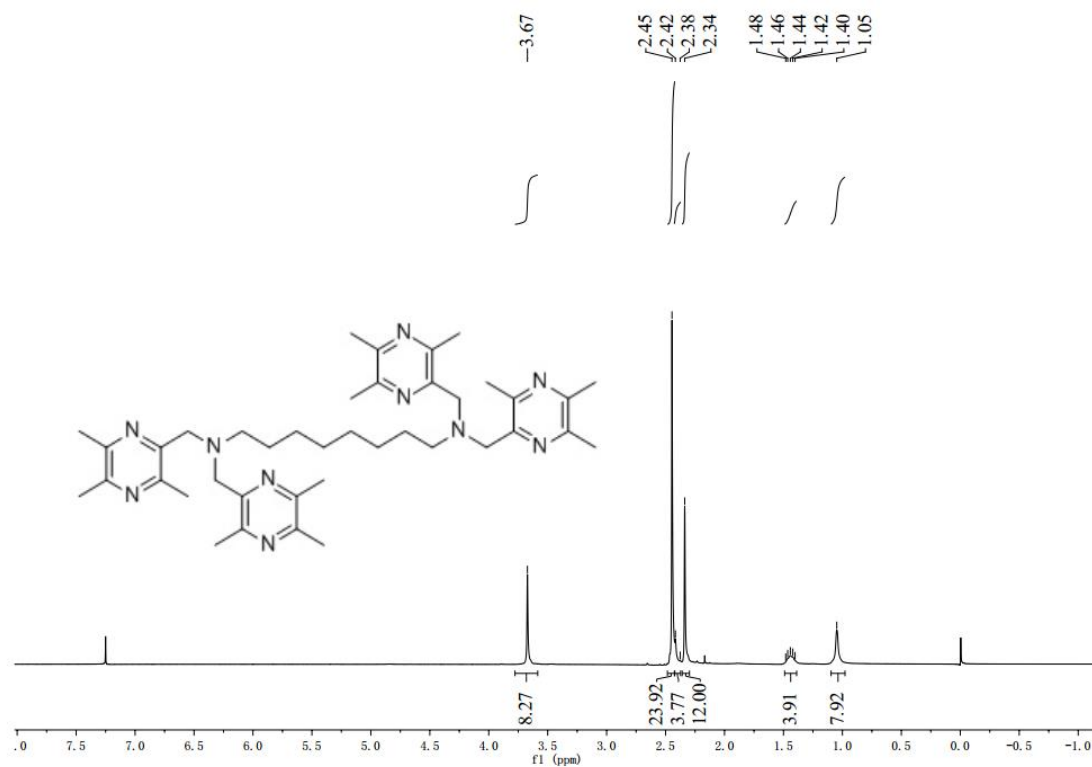

Figure S56 <sup>1</sup>H NMR spectrum of compound 6e.

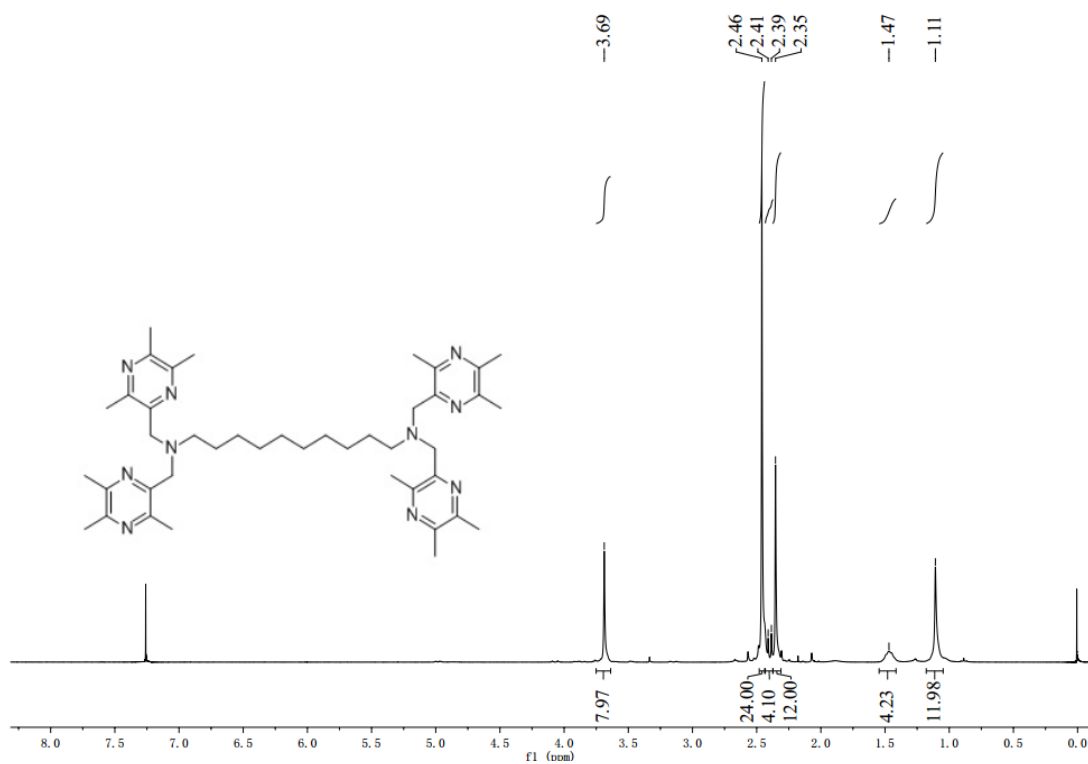

Figure S57  $^1\text{H}$  NMR spectrum of compound **6f**.

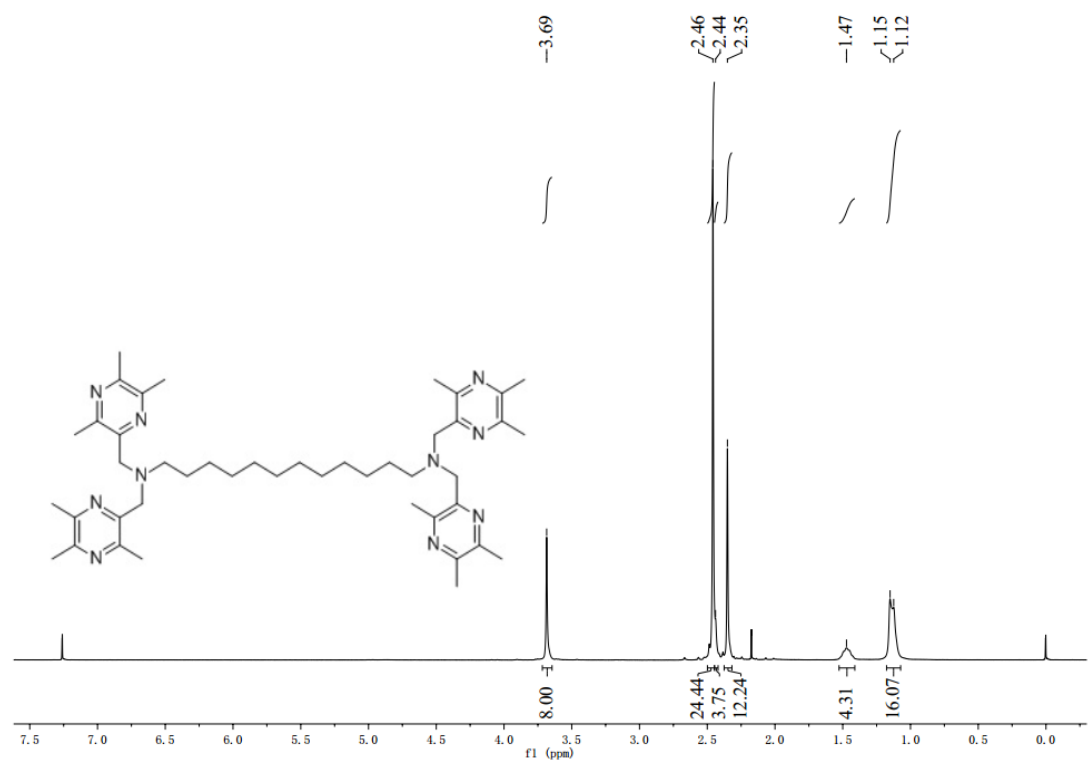

Figure S58  $^1\text{H}$  NMR spectrum of compound **6g**.

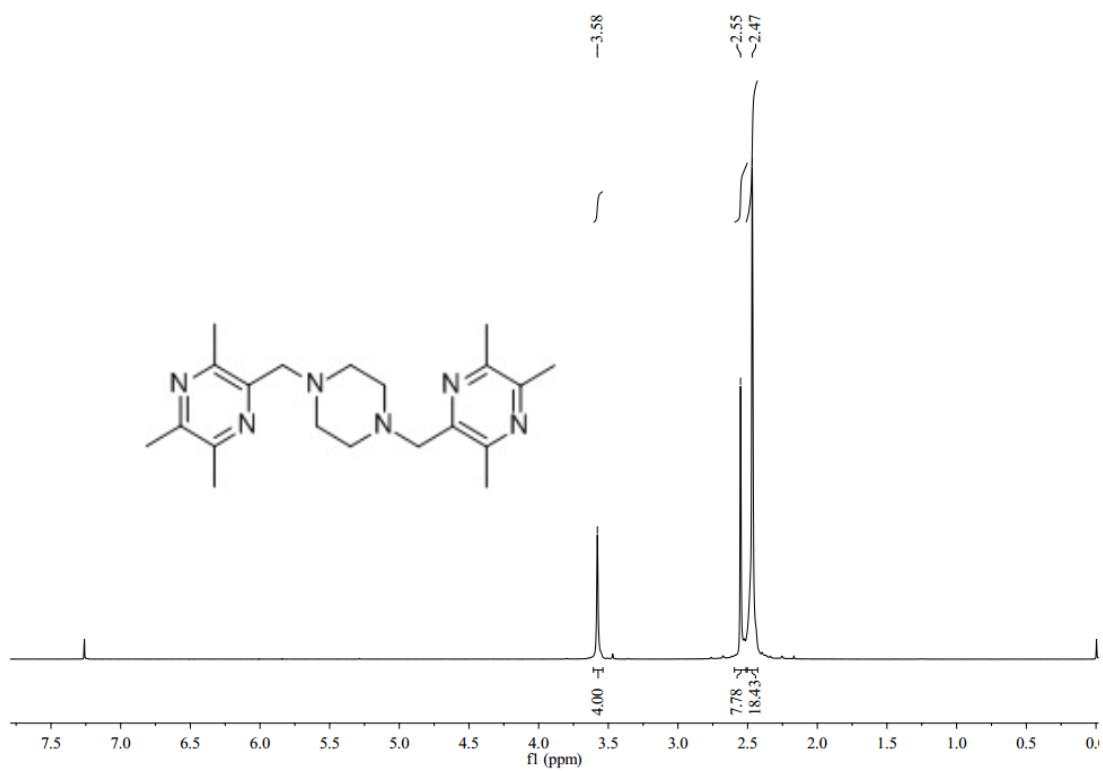

Figure S59 <sup>1</sup>H NMR spectrum of compound **6h**.

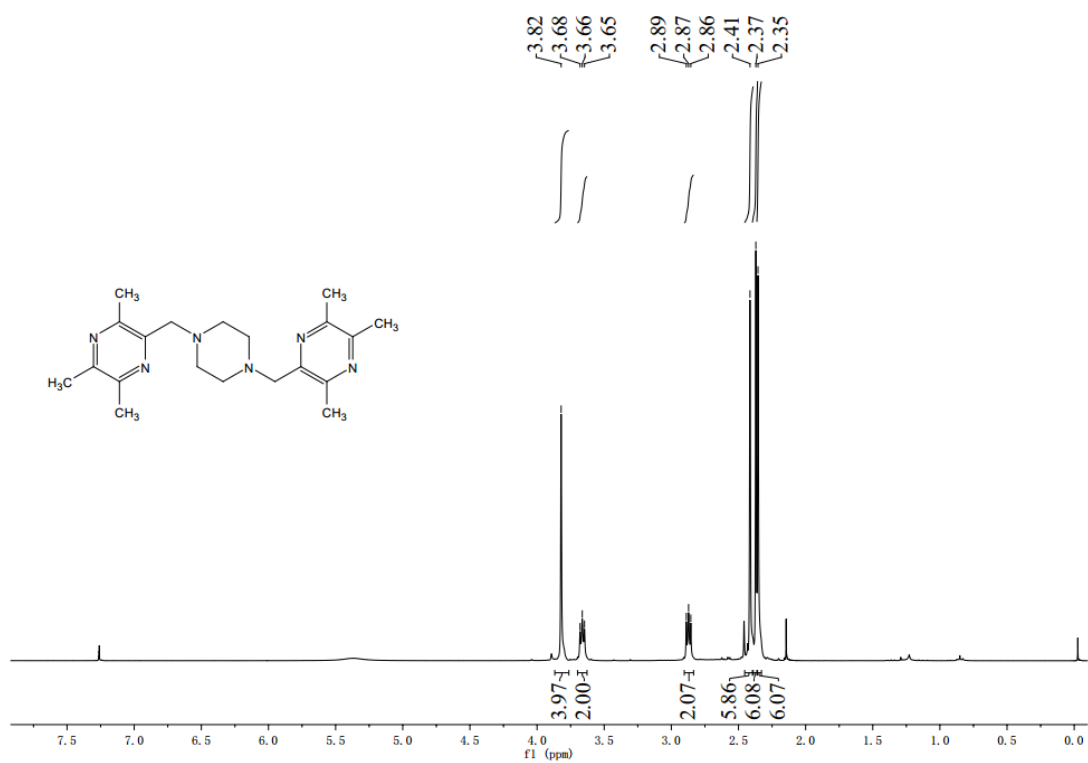

Figure S60 <sup>1</sup>H NMR spectrum of compound **6i**.

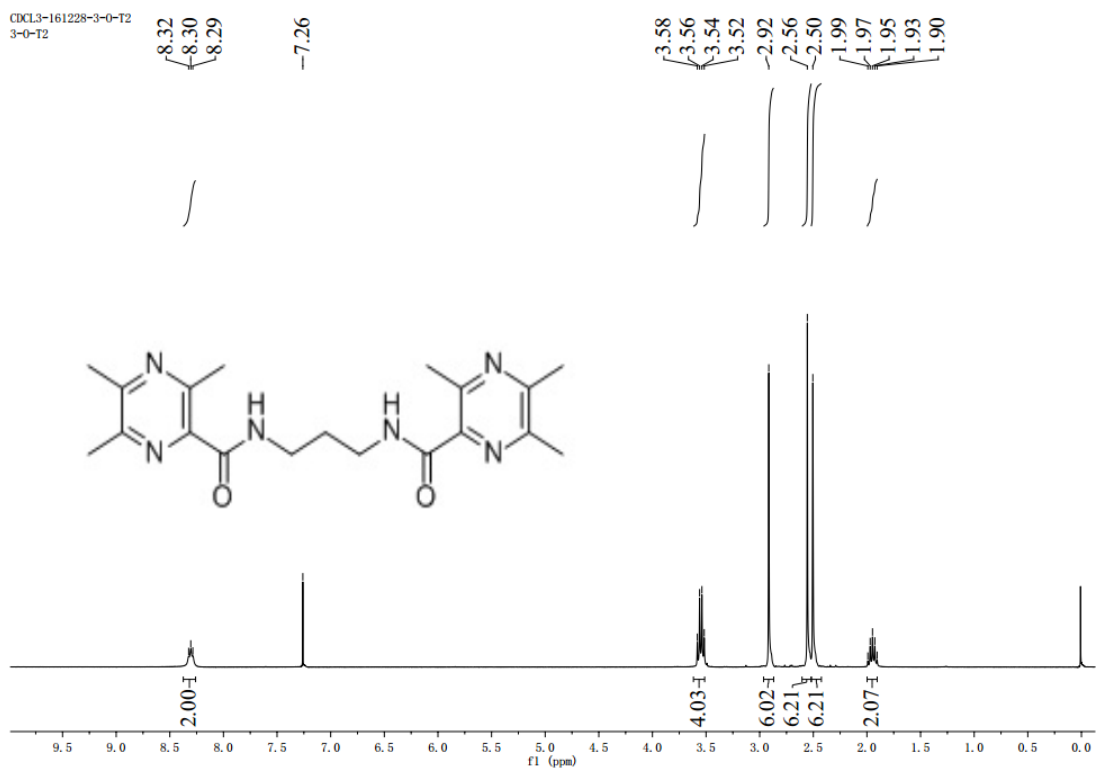

Figure S61 <sup>1</sup>H NMR spectrum of compound **8a**.

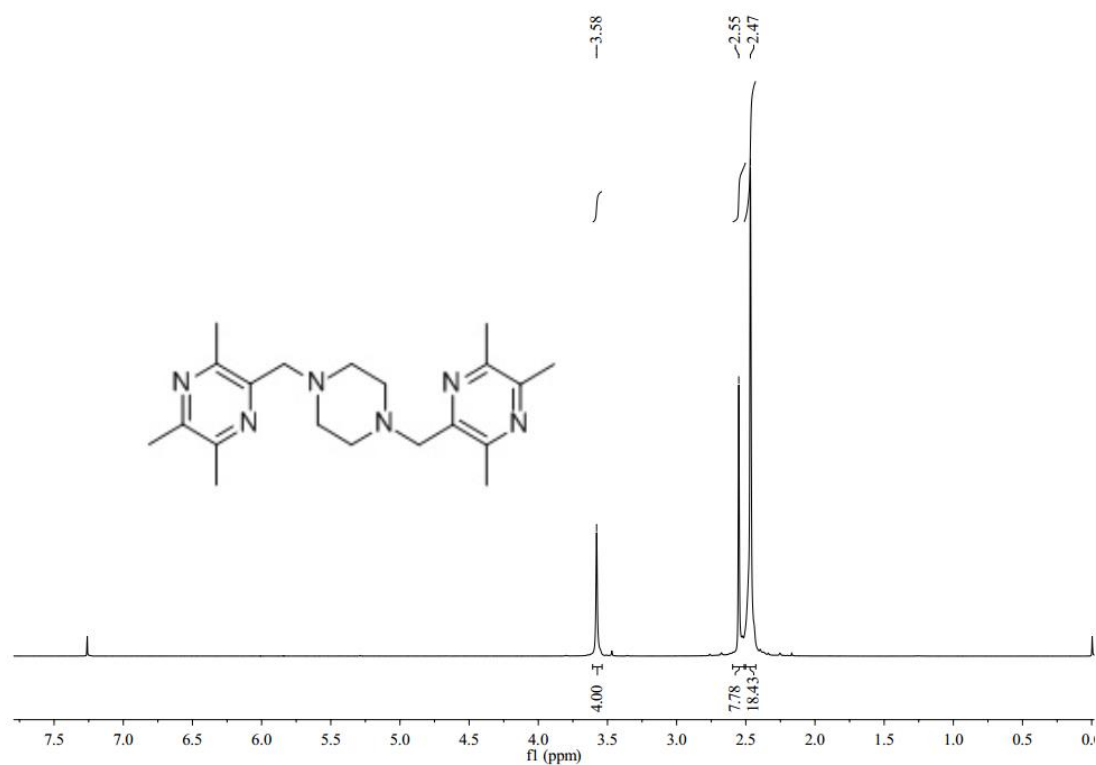

Figure S62 <sup>1</sup>H NMR spectrum of compound **8b**.

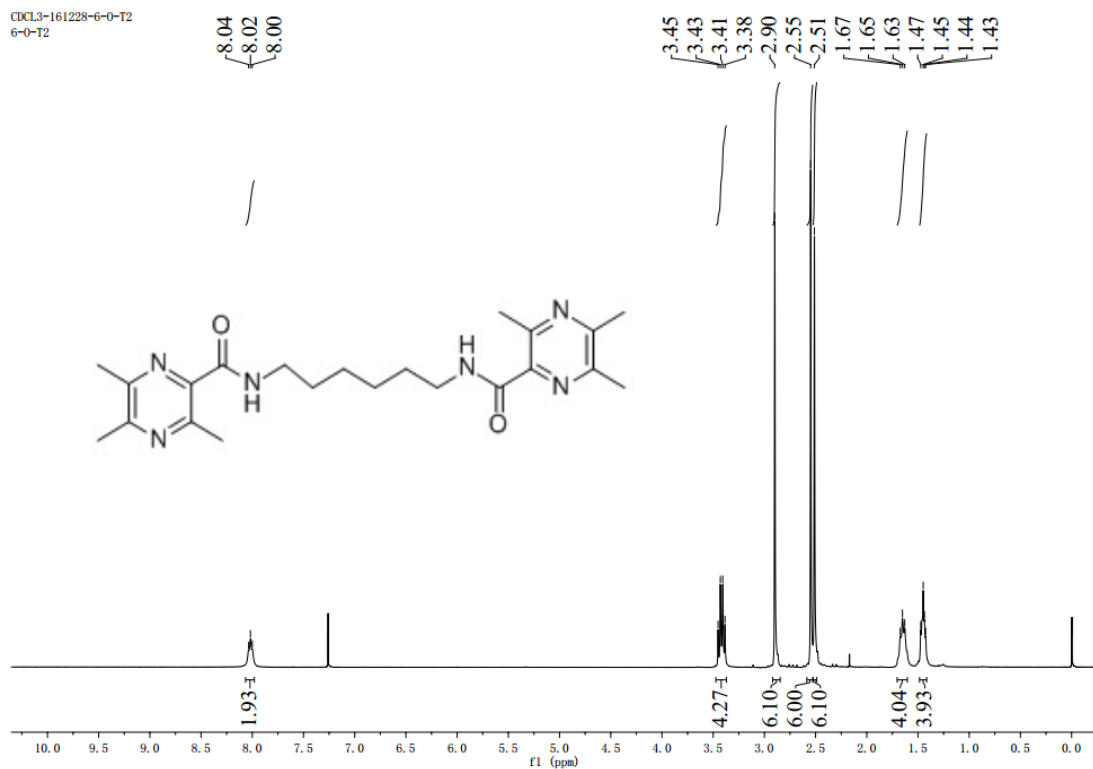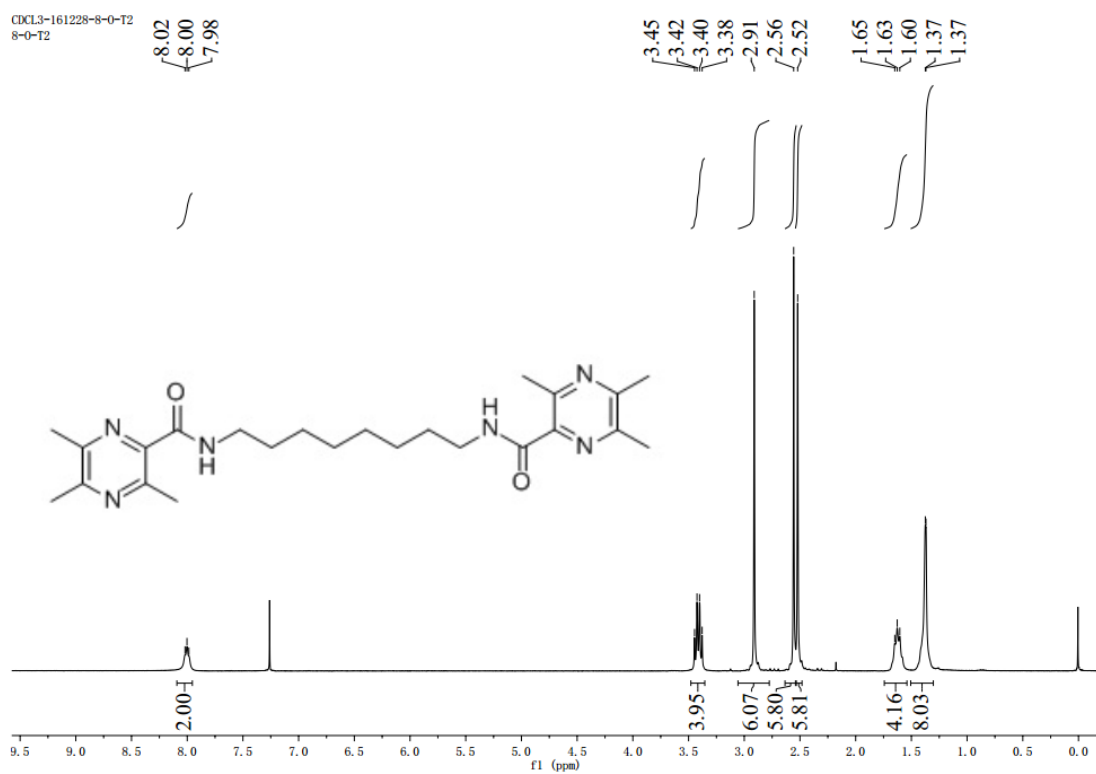



CDCL3-161228-10-0-T2  
10-0-T2

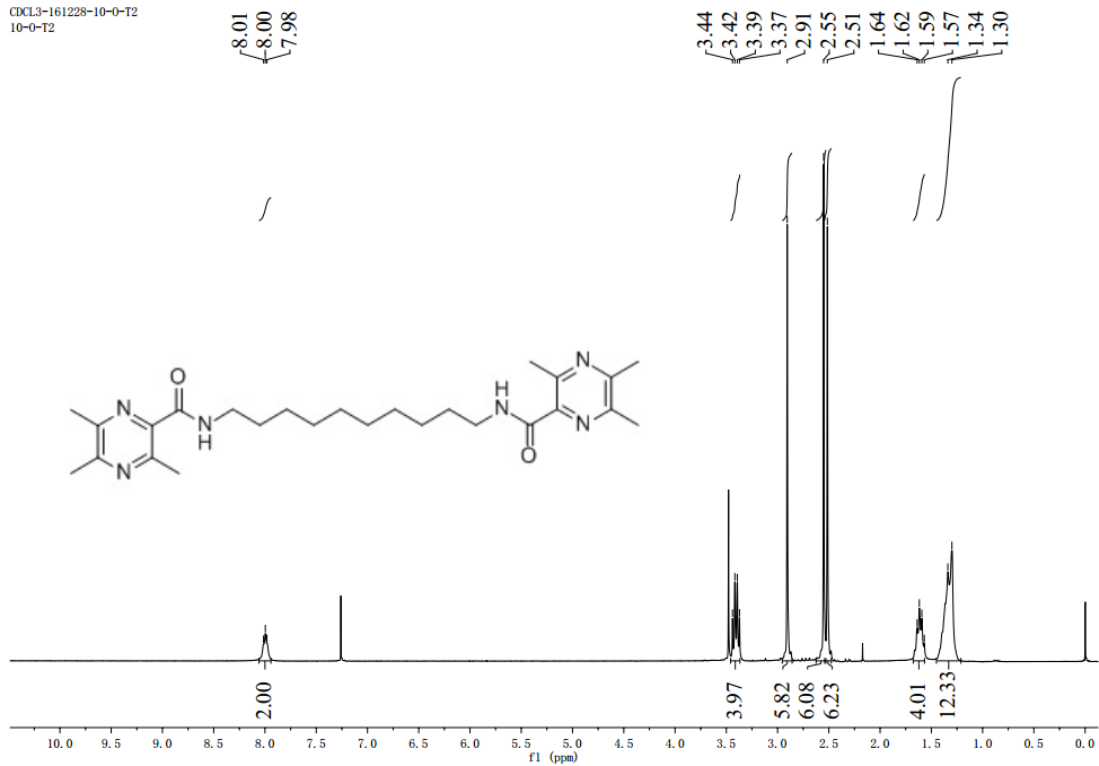

Figure S65  $^1\text{H}$  NMR spectrum of compound **8e**.

CDCL3-161228-12-0-T2  
12-0-T2

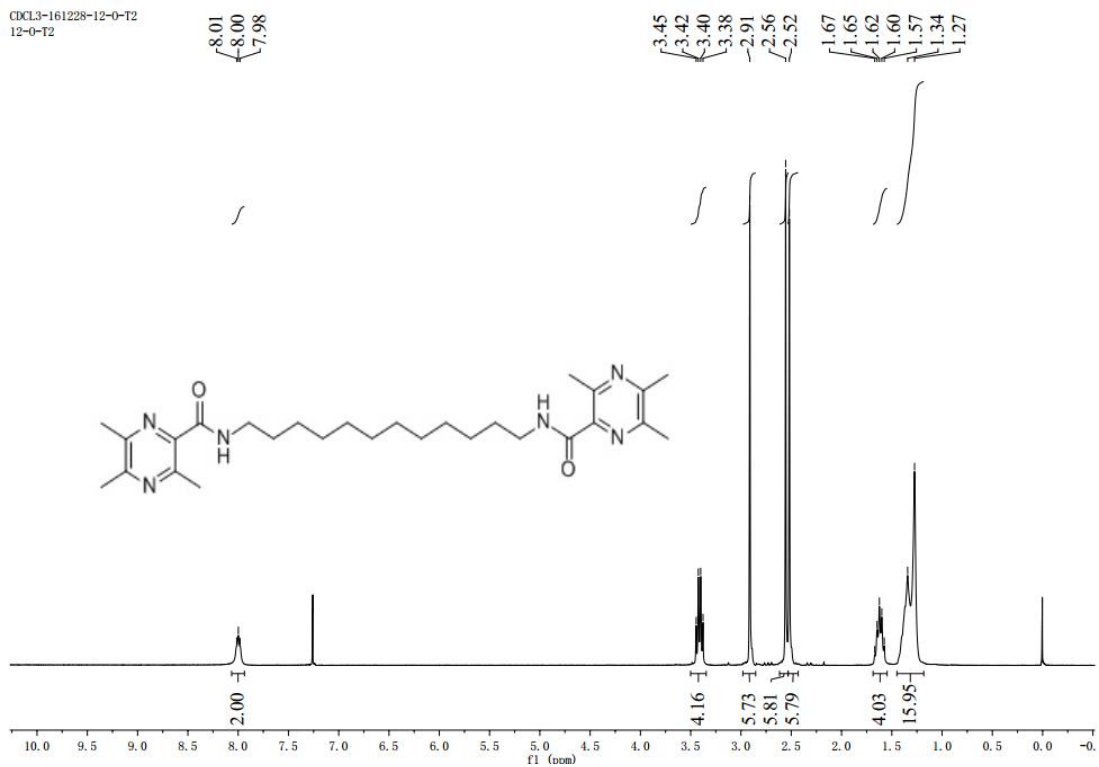

Figure S66  $^1\text{H}$  NMR spectrum of compound **8f**.

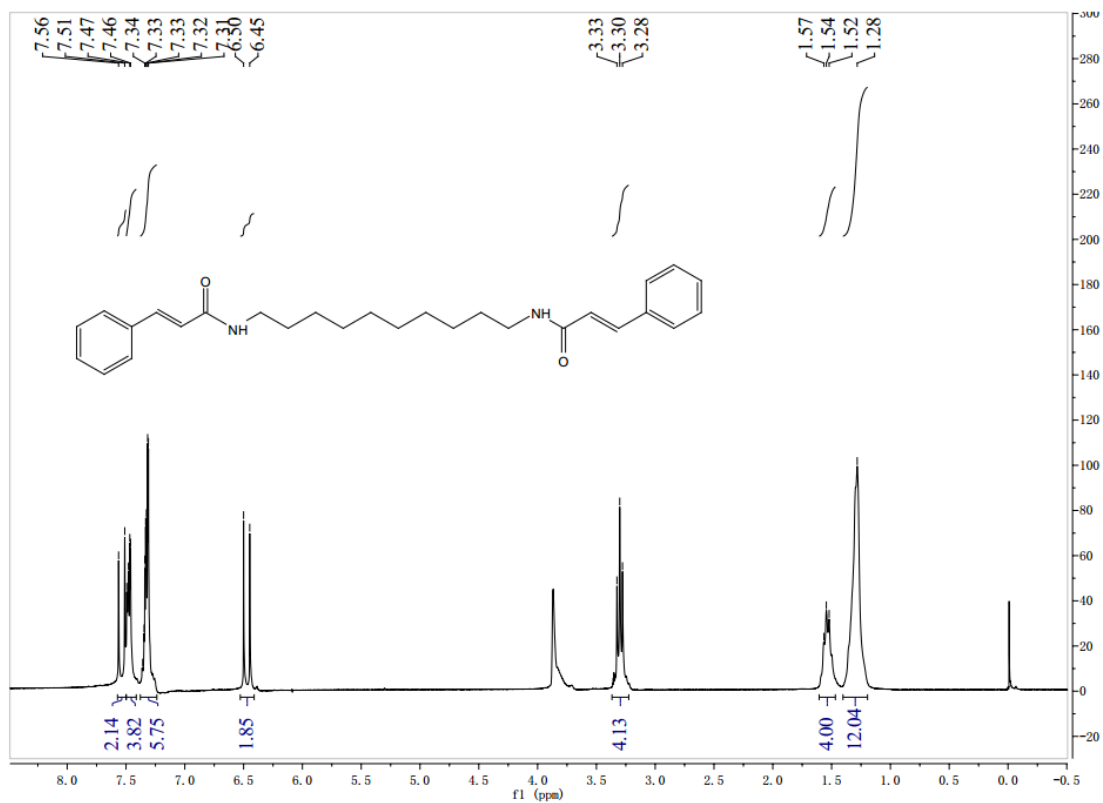

Figure S67 <sup>1</sup>H NMR spectrum of compound **9e**.

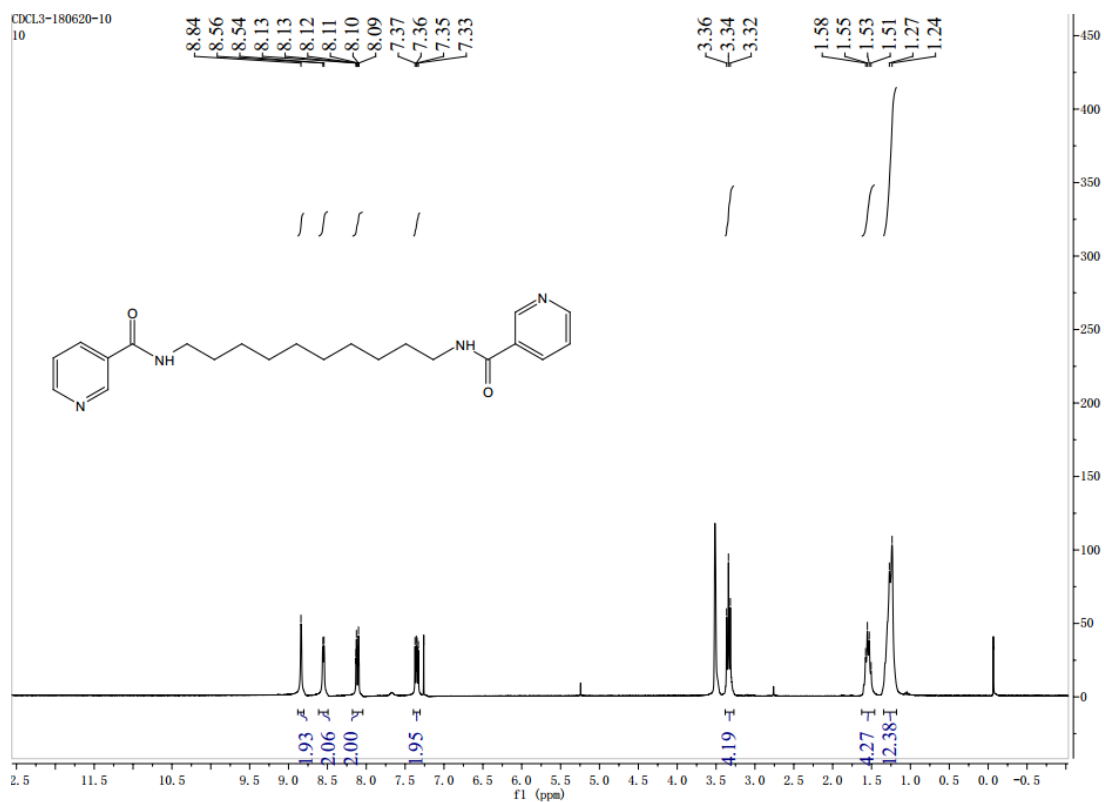

Figure S68 <sup>1</sup>H NMR spectrum of compound **10e**.

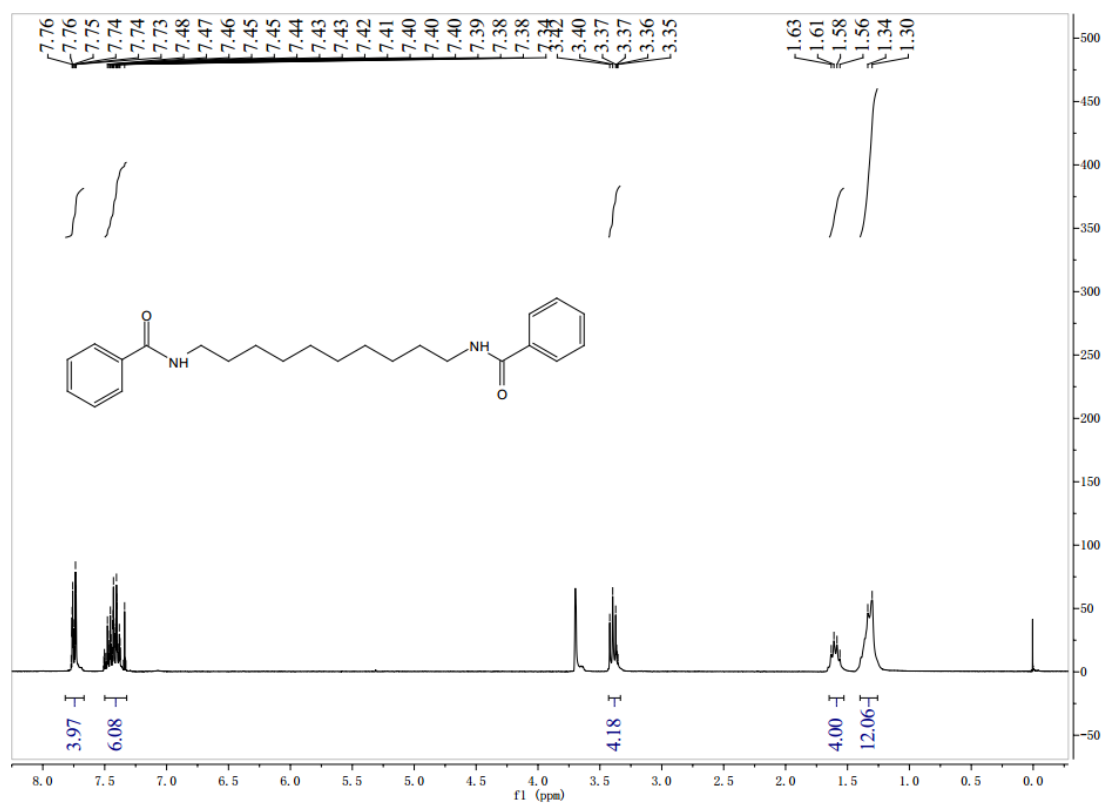

Figure S69 <sup>1</sup>H NMR spectrum of compound **11e**.

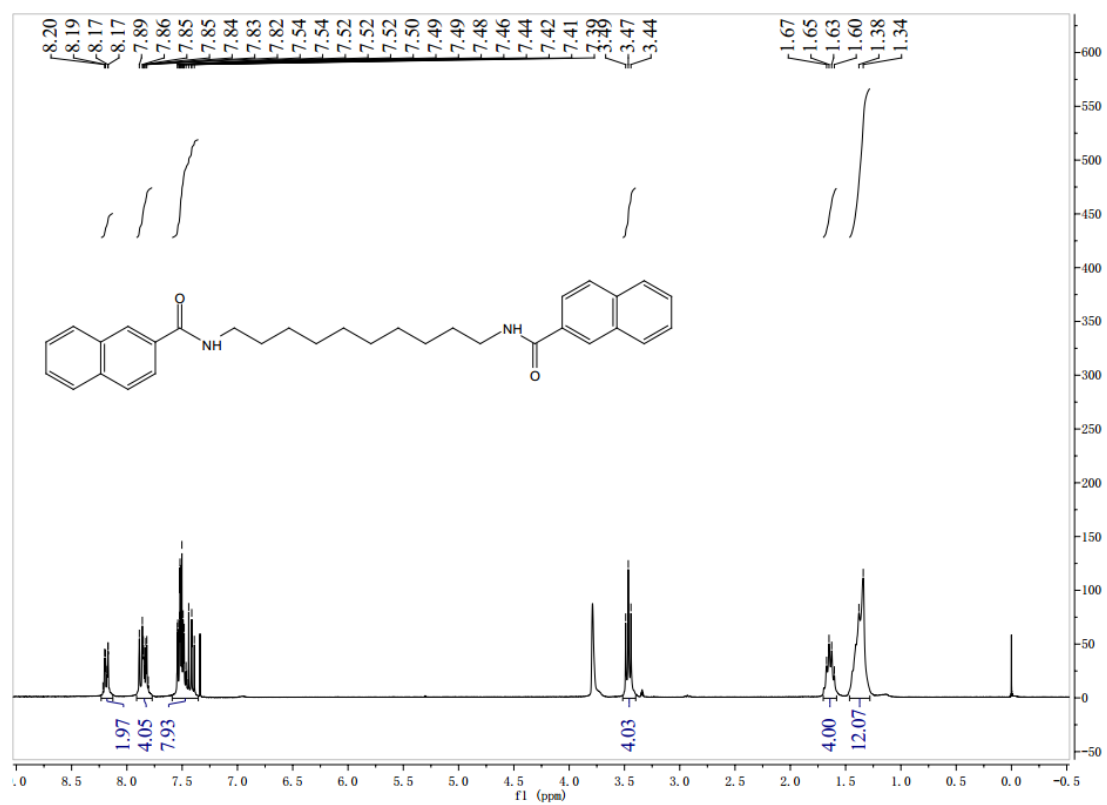

Figure S70 <sup>1</sup>H NMR spectrum of compound **12e**.



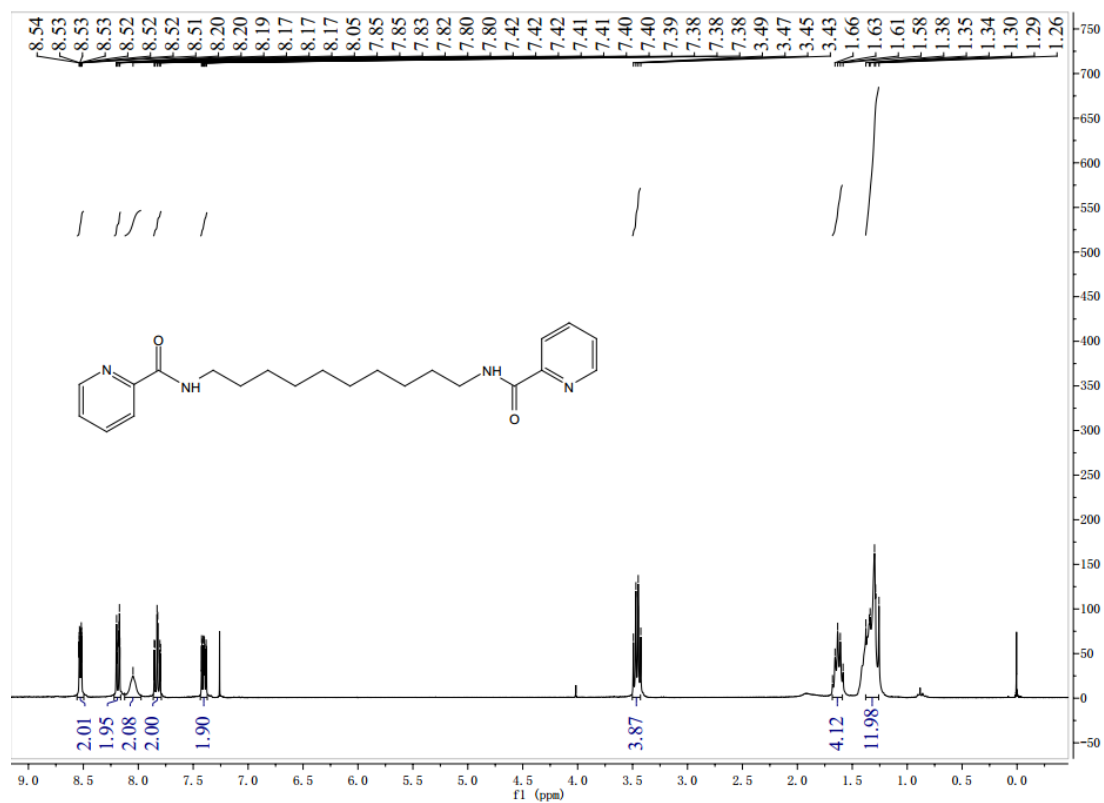

Figure S73 <sup>1</sup>H NMR spectrum of compound 15e.

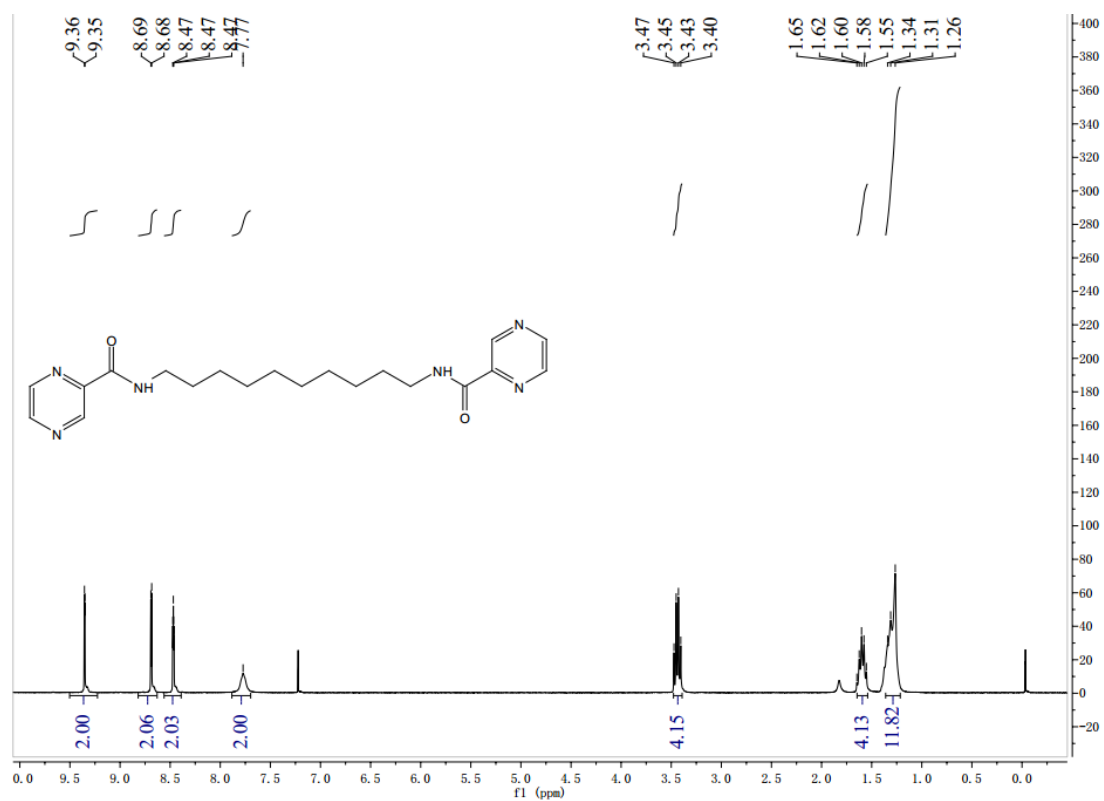

Figure S74 <sup>1</sup>H NMR spectrum of compound 16e.

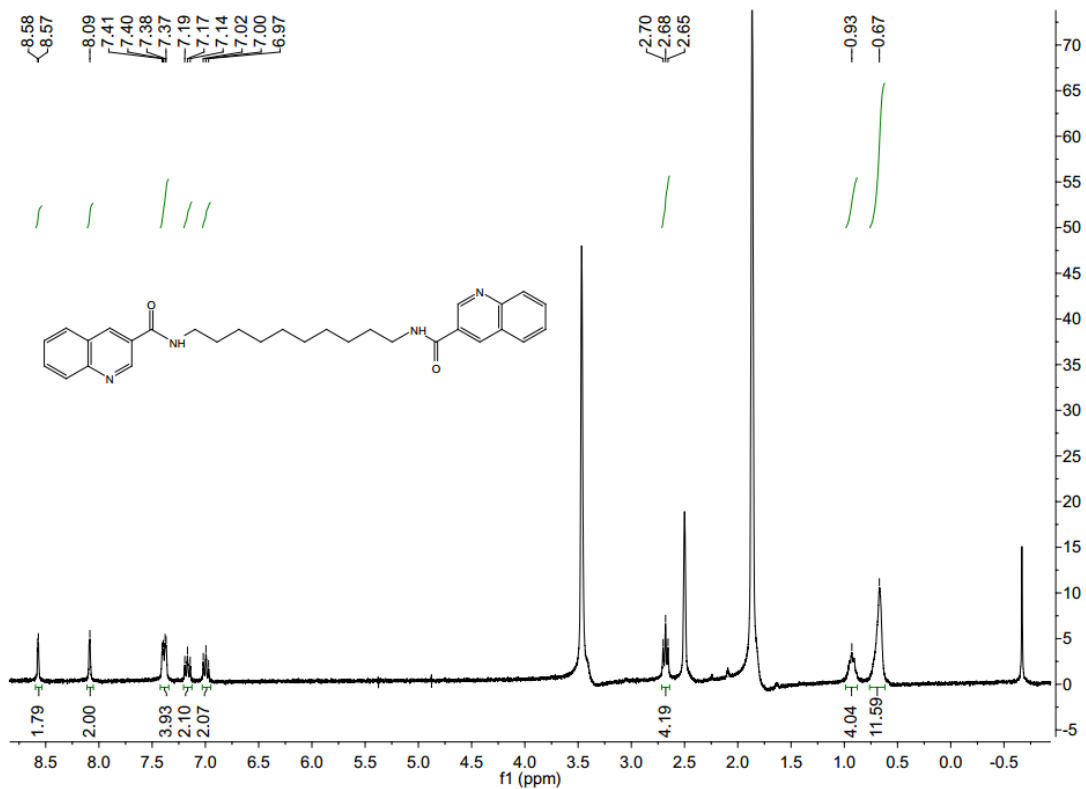

Figure S75  $^1\text{H}$  NMR spectrum of compound **17e**.

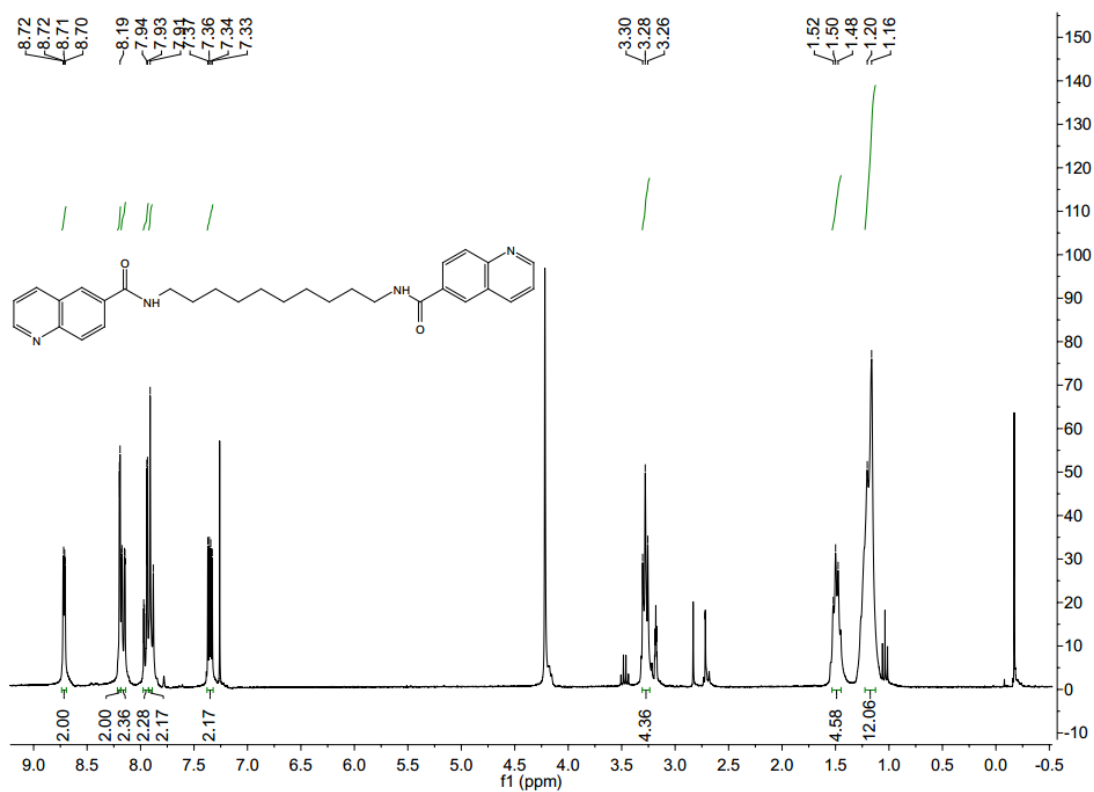

Figure S76  $^1\text{H}$  NMR spectrum of compound **18e**.

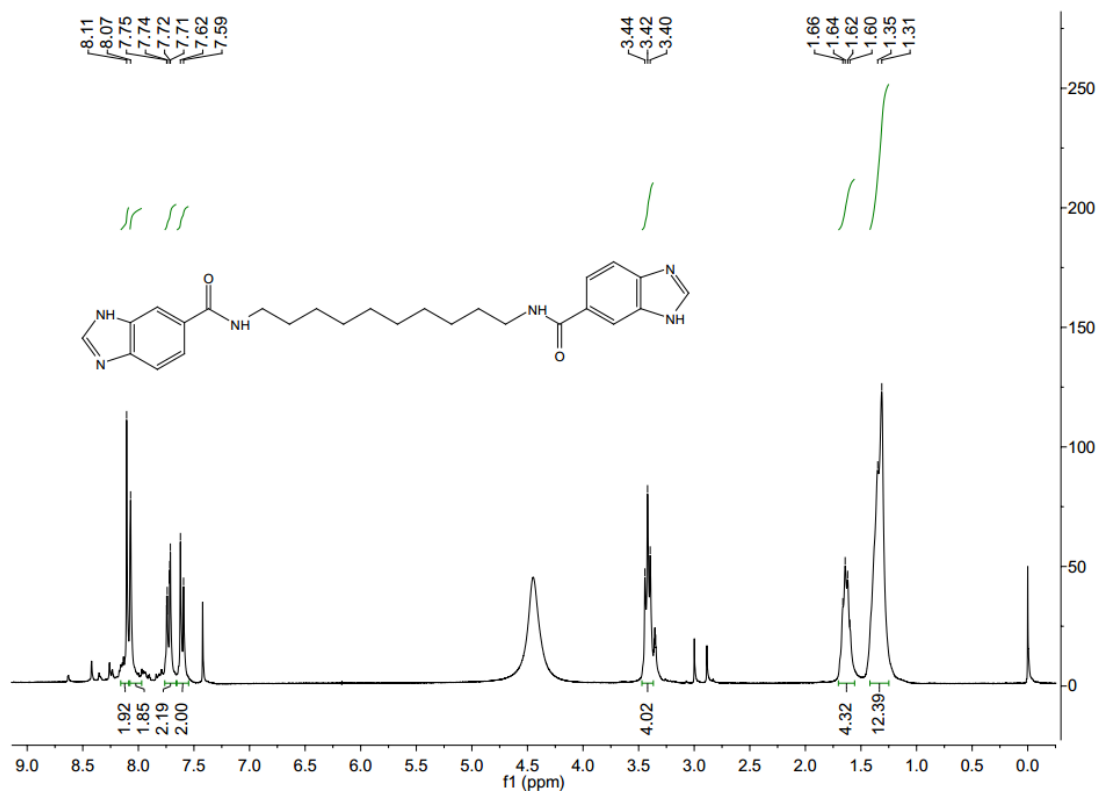

Figure S77  $^1\text{H}$  NMR spectrum of compound **19e**.

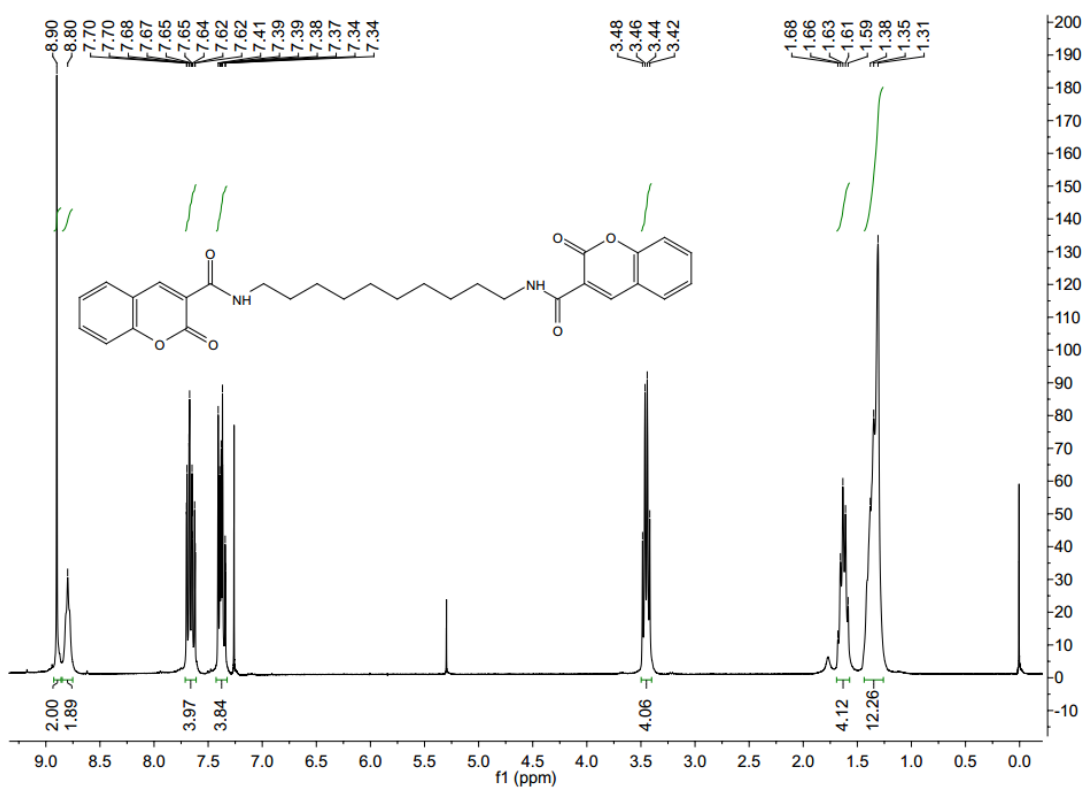

Figure S78  $^1\text{H}$  NMR spectrum of compound **20e**.

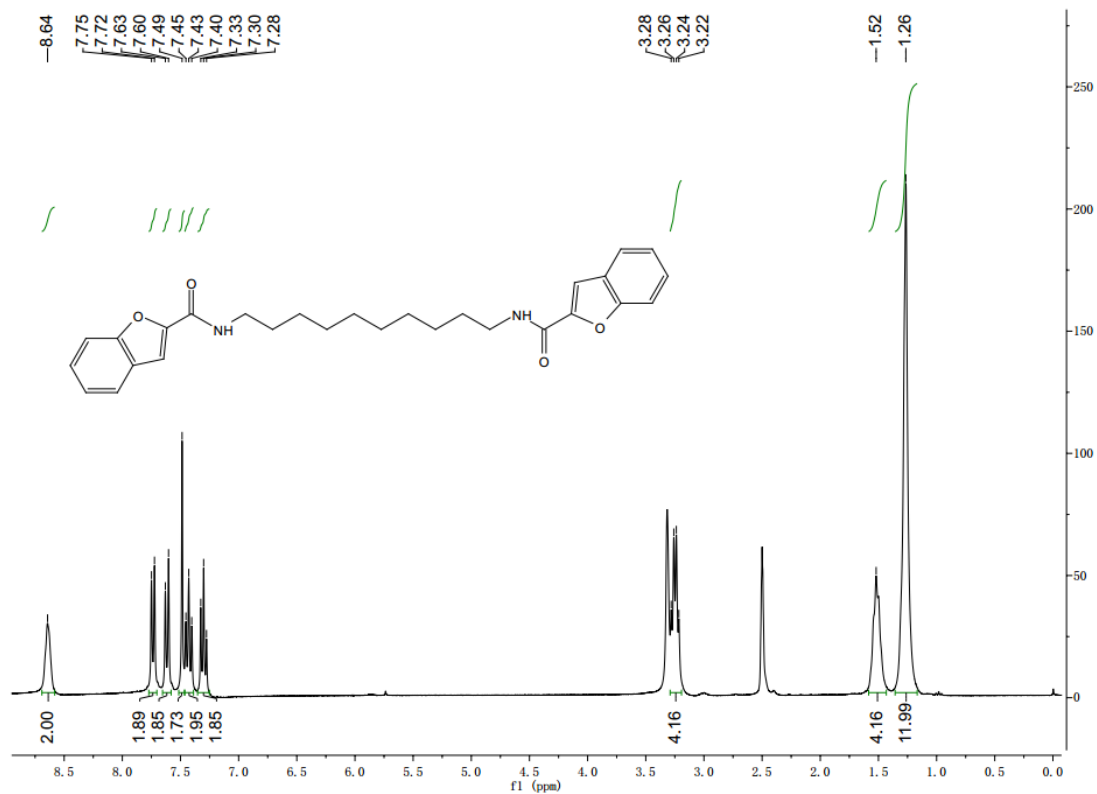

Figure S79  $^1\text{H}$  NMR spectrum of compound **21e**.

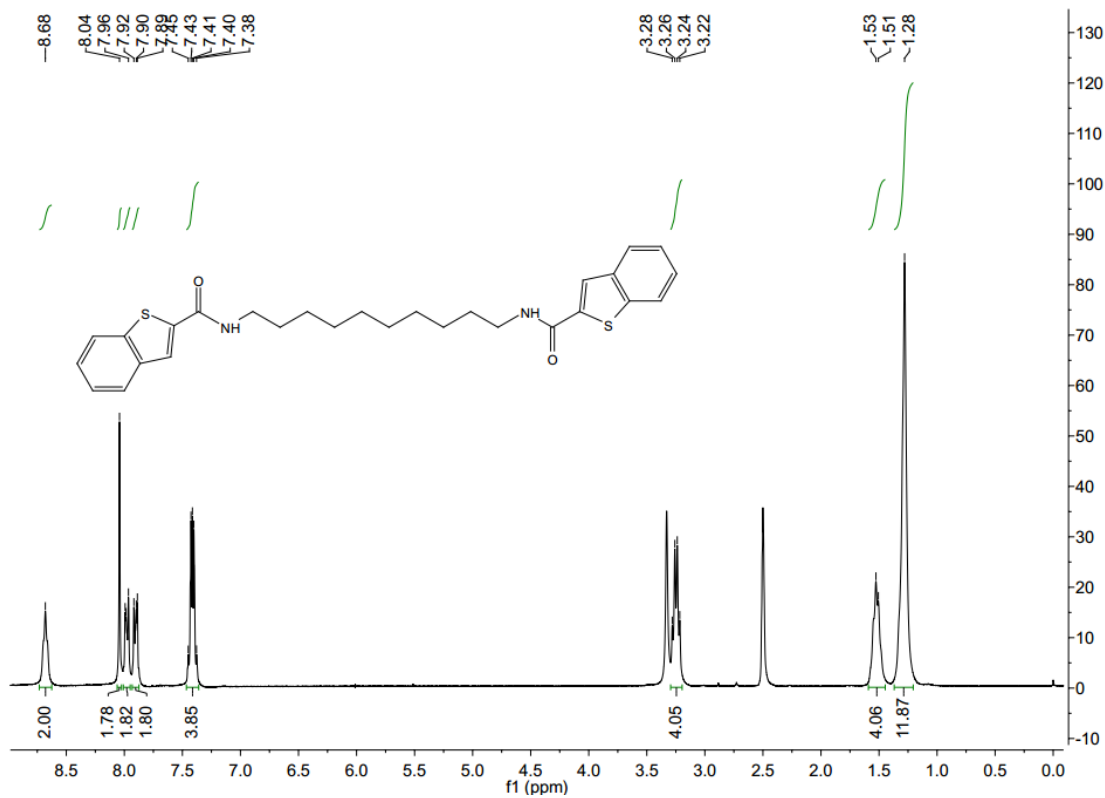

Figure S80  $^1\text{H}$  NMR spectrum of compound **22e**.



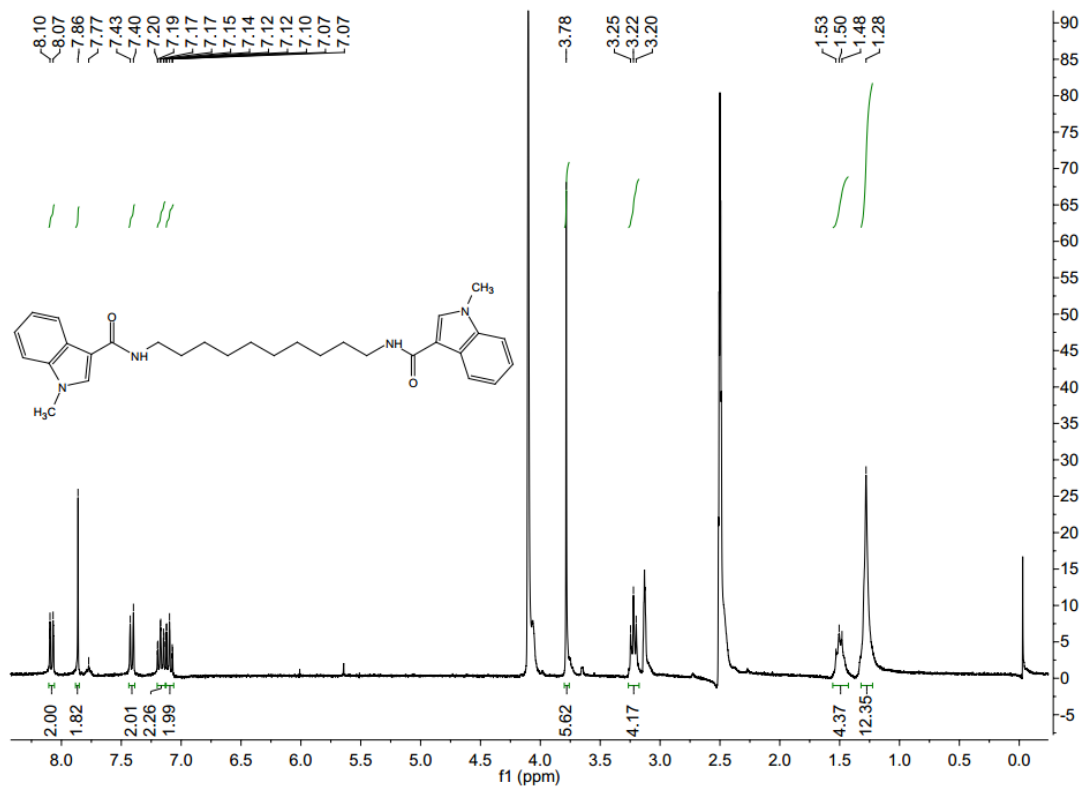

Figure S81  $^1\text{H}$  NMR spectrum of compound **23e**.

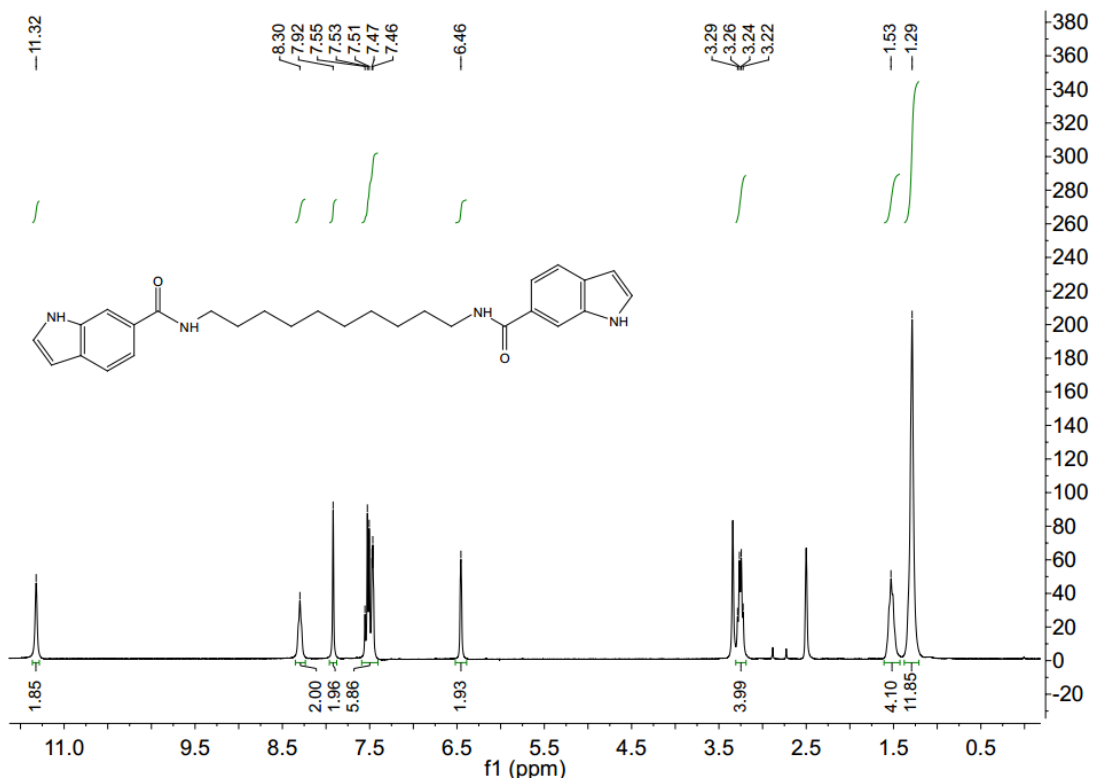

Figure S82  $^1\text{H}$  NMR spectrum of compound **24e**.

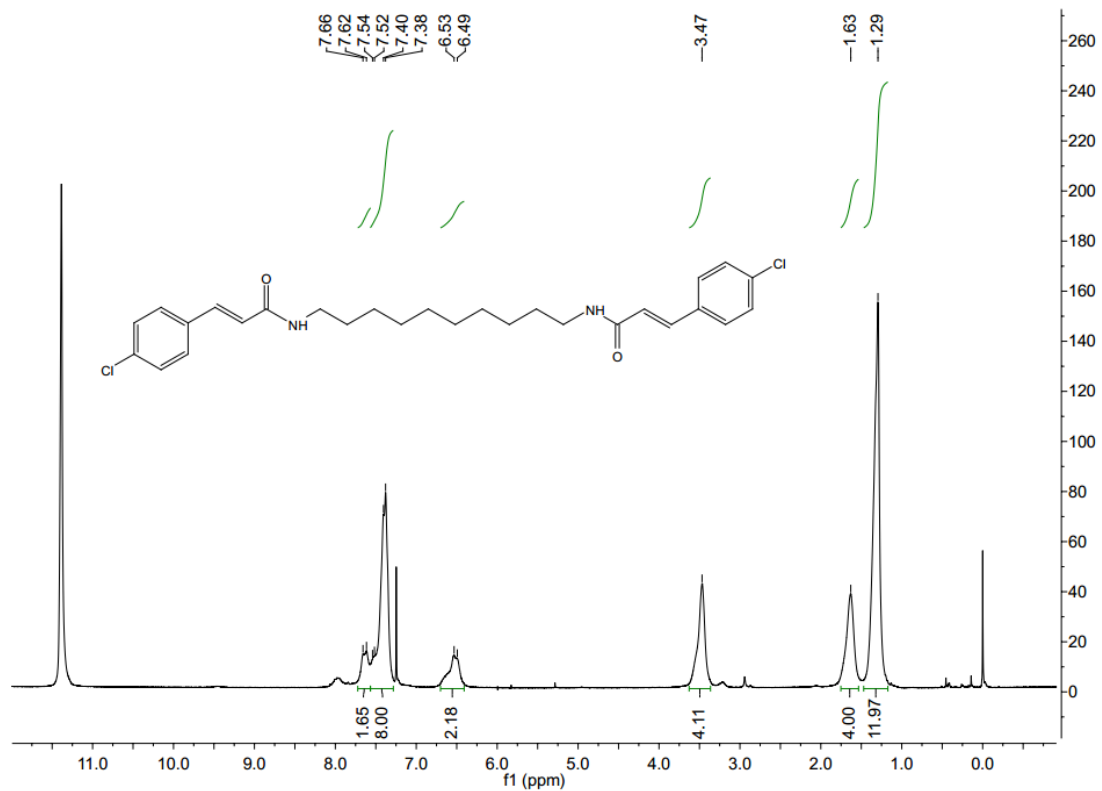

Figure S83  $^1\text{H}$  NMR spectrum of compound **25e**.

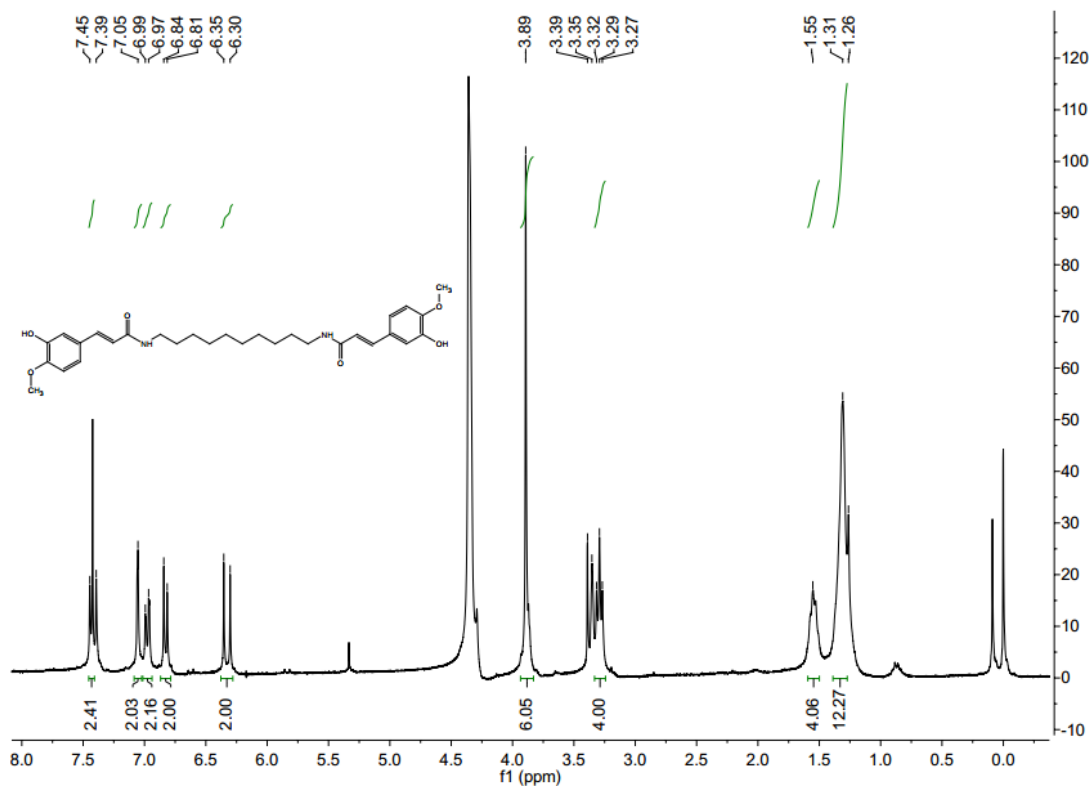

Figure S84  $^1\text{H}$  NMR spectrum of compound **26e**.

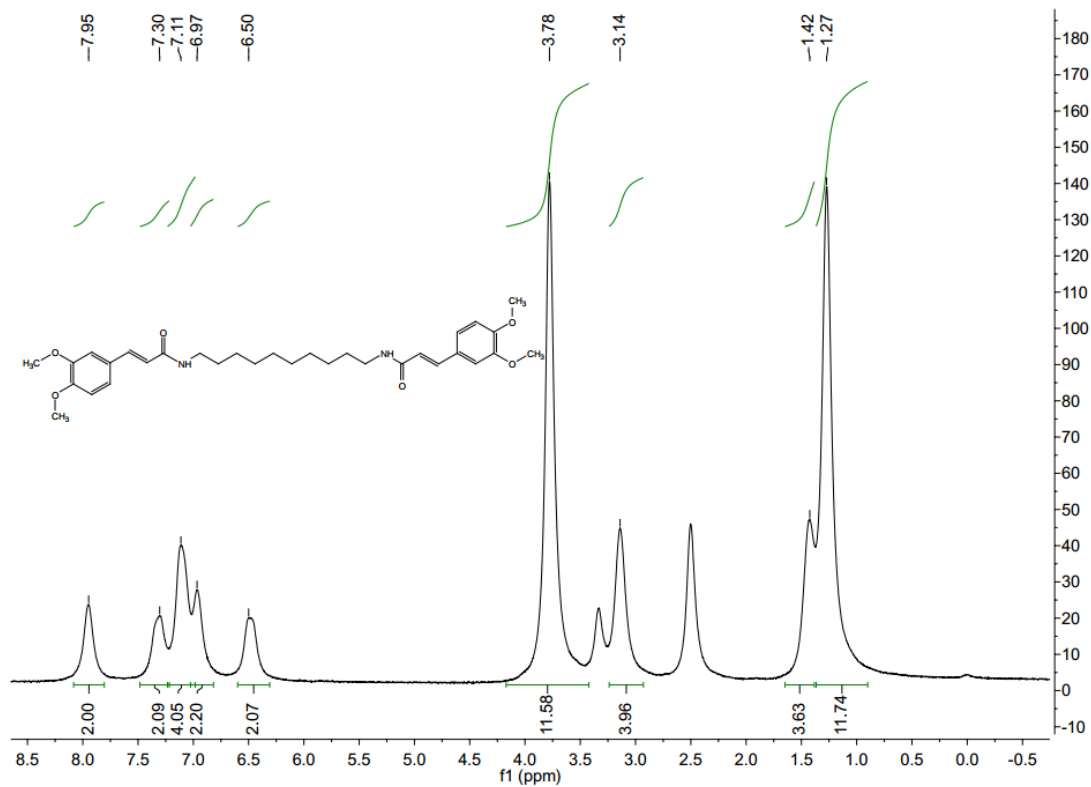

Figure S85  $^1\text{H}$  NMR spectrum of compound **27e**.

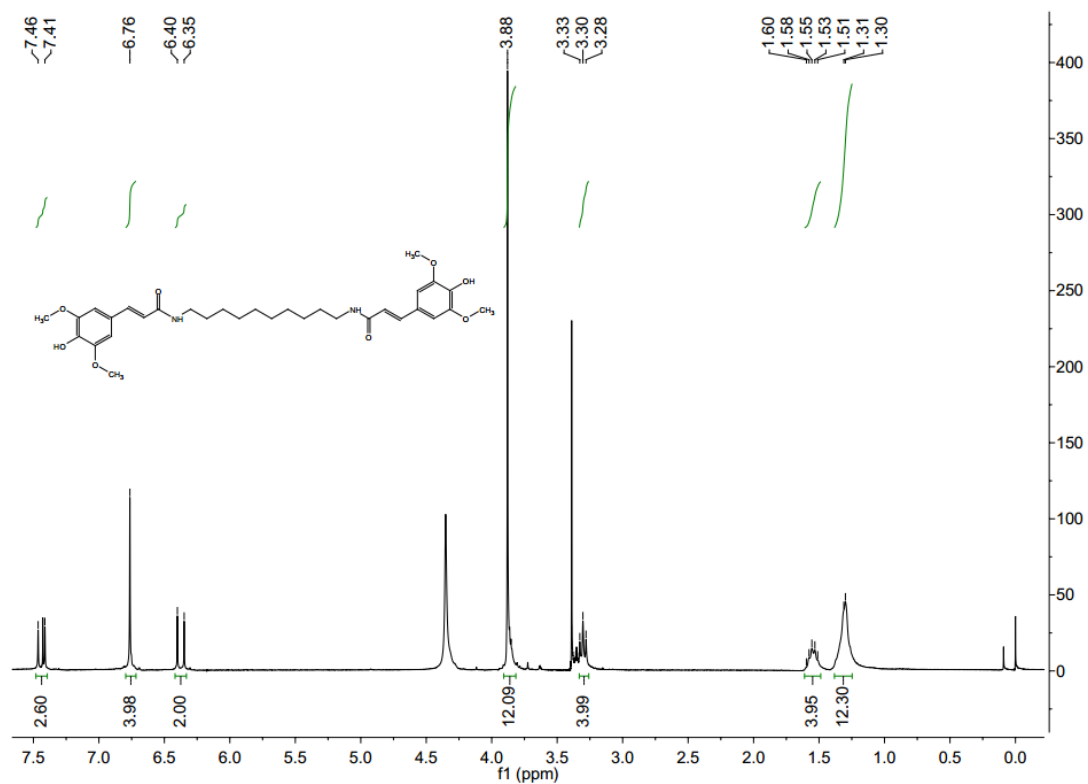

Figure S86  $^1\text{H}$  NMR spectrum of compound **28e**.

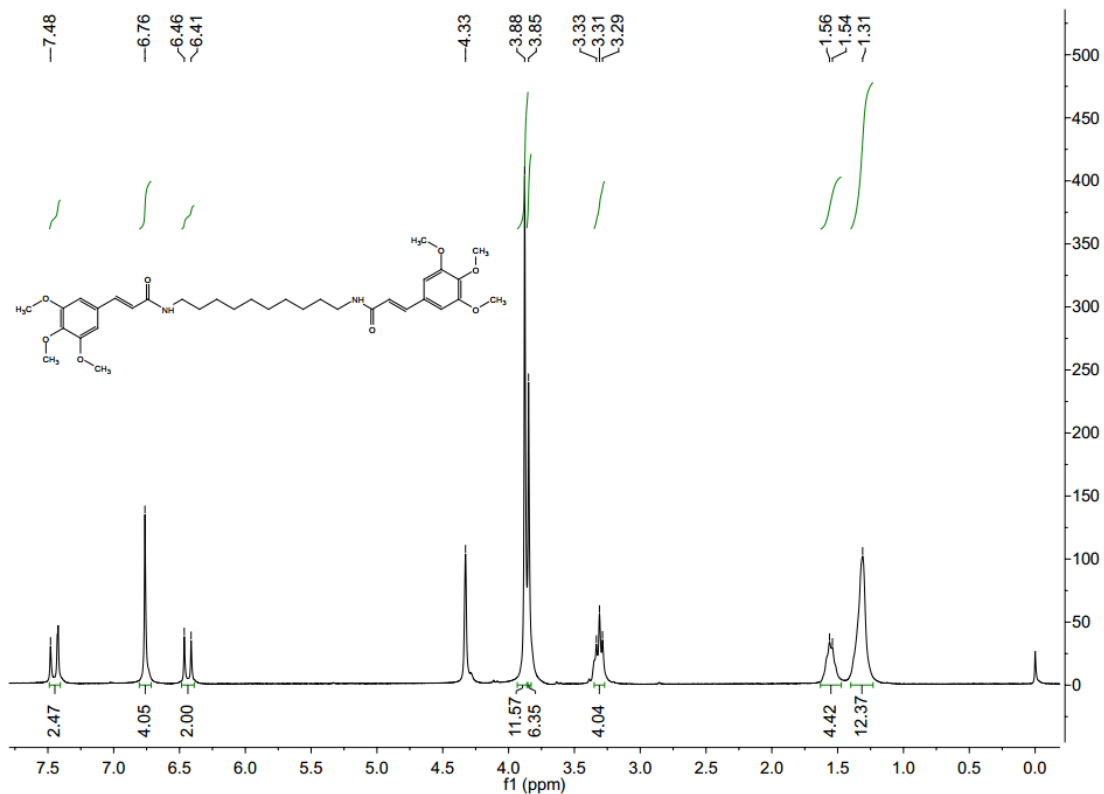

Figure S87  $^1\text{H}$  NMR spectrum of compound **29e**.

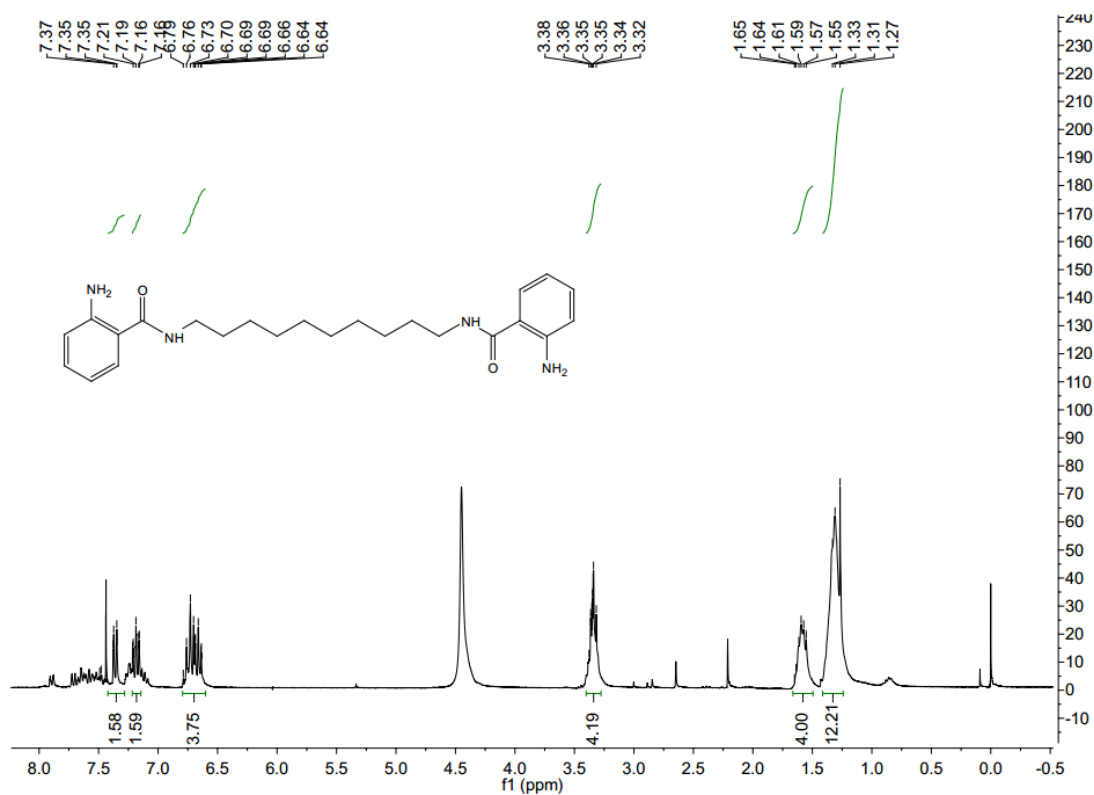

Figure S88  $^1\text{H}$  NMR spectrum of compound **30e**.

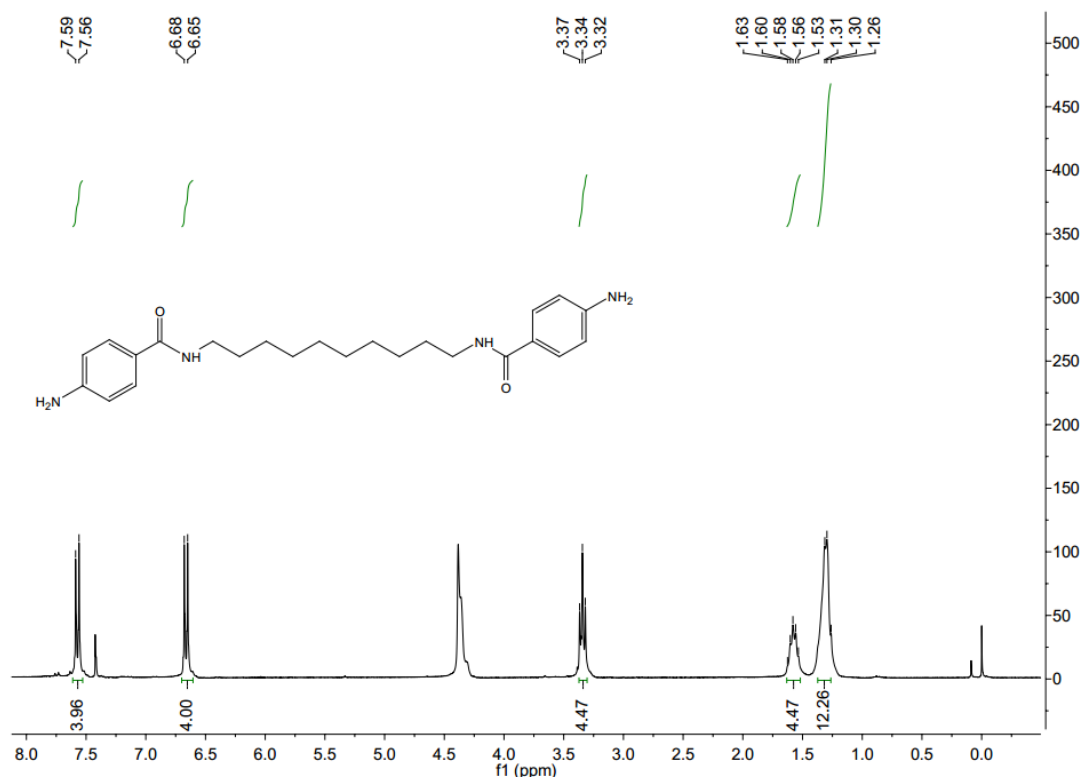

Figure S89 <sup>1</sup>H NMR spectrum of compound **31e**.

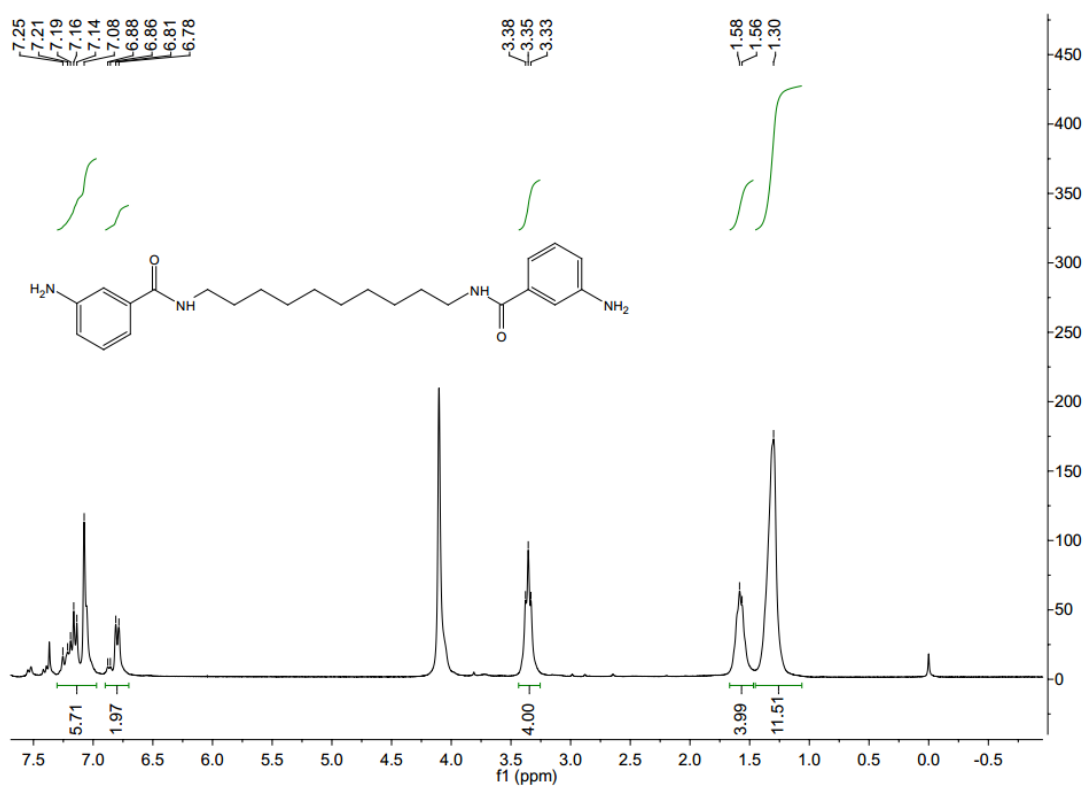

Figure S90 <sup>1</sup>H NMR spectrum of compound **32e**.

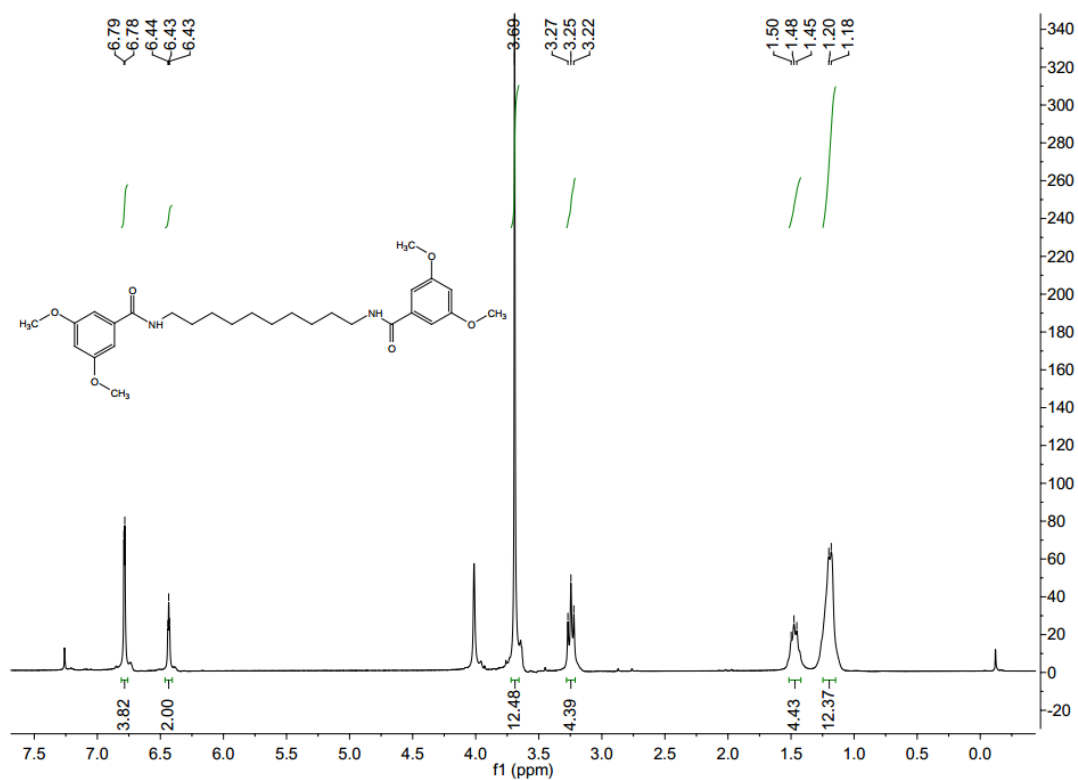

Figure S91  $^1\text{H}$  NMR spectrum of compound 33e.

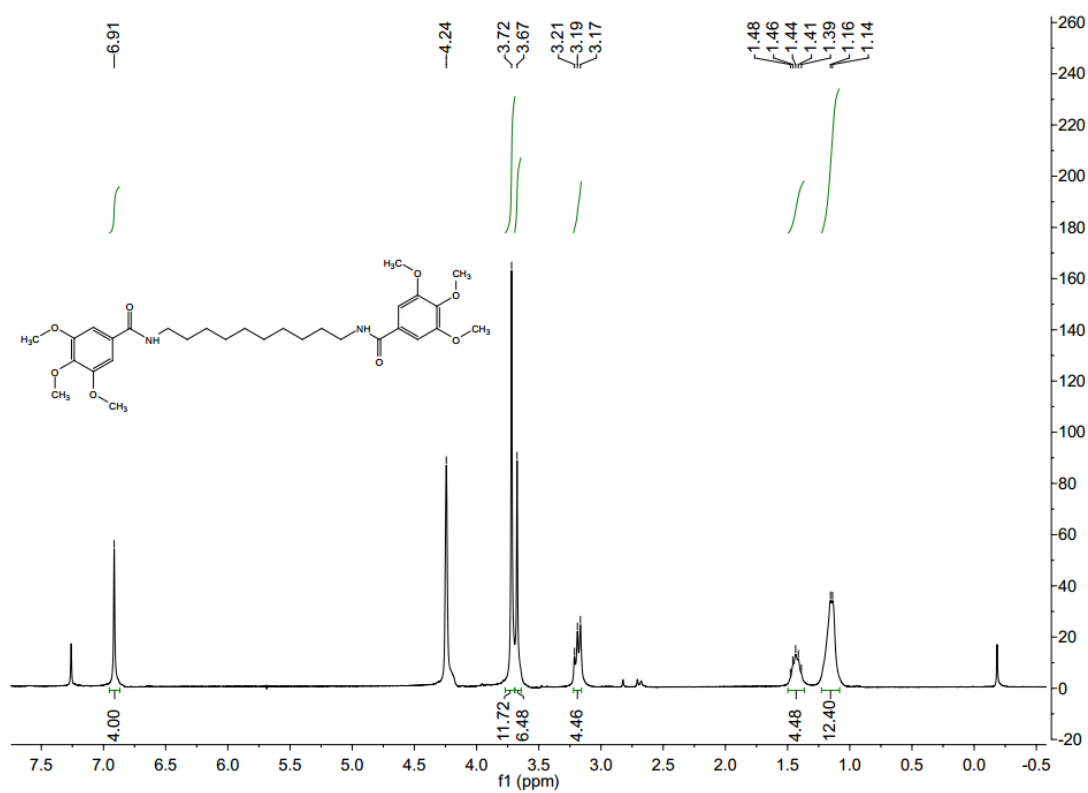

Figure S92  $^1\text{H}$  NMR spectrum of compound 34e.

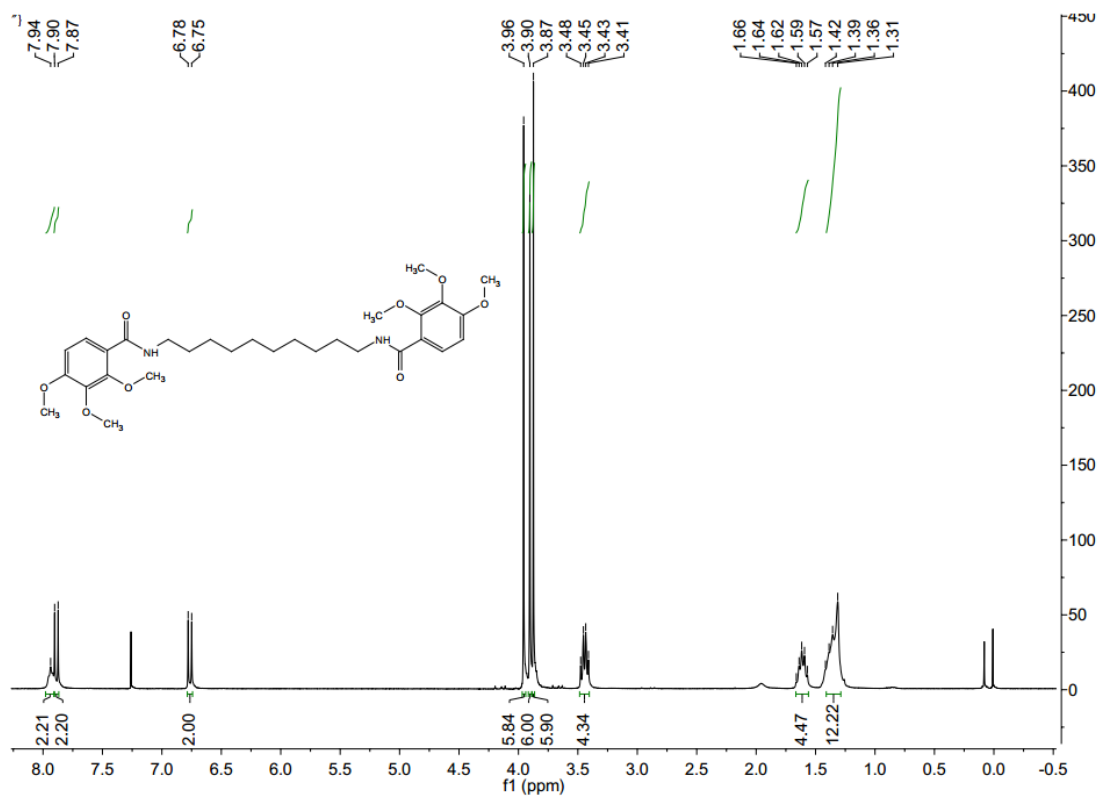

Figure S93  $^1\text{H}$  NMR spectrum of compound **35e**.

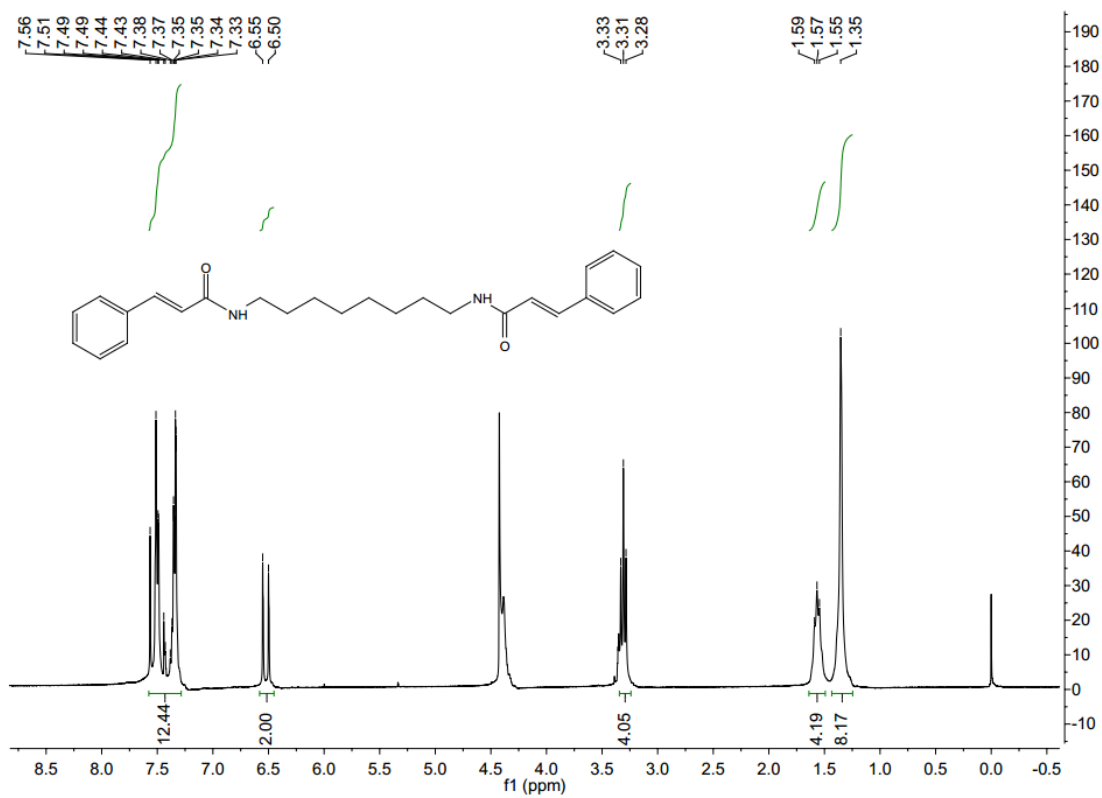

Figure S94  $^1\text{H}$  NMR spectrum of compound **9d**.

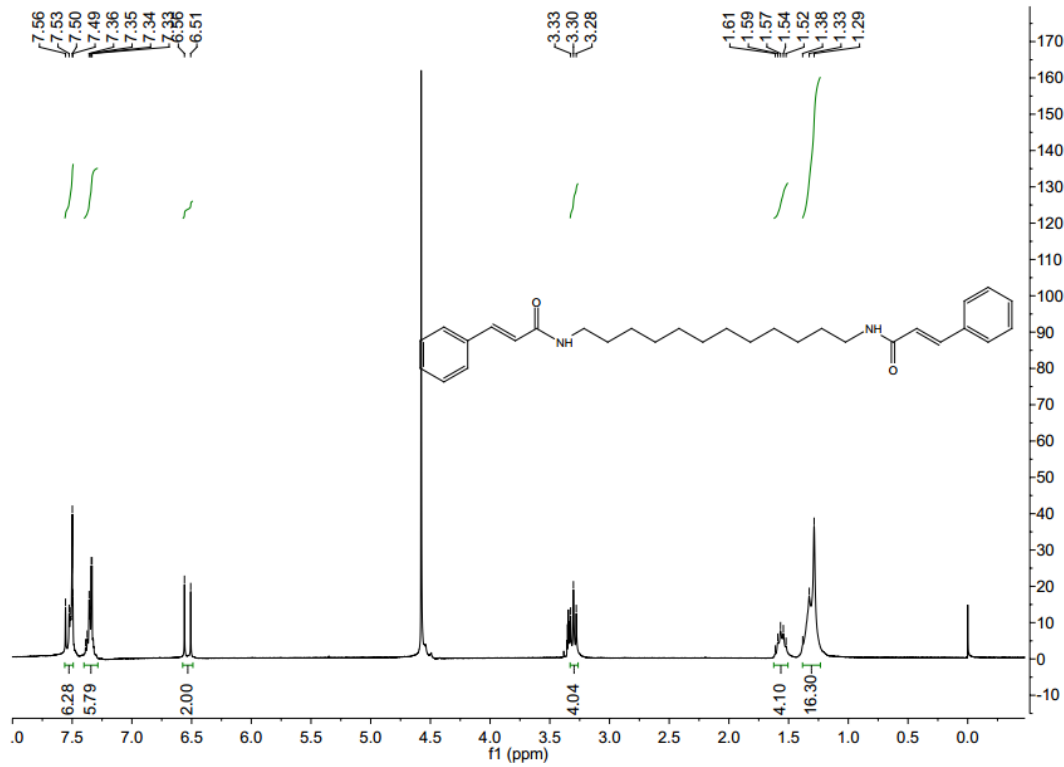

Figure S95  $^1\text{H}$  NMR spectrum of compound **9f**.

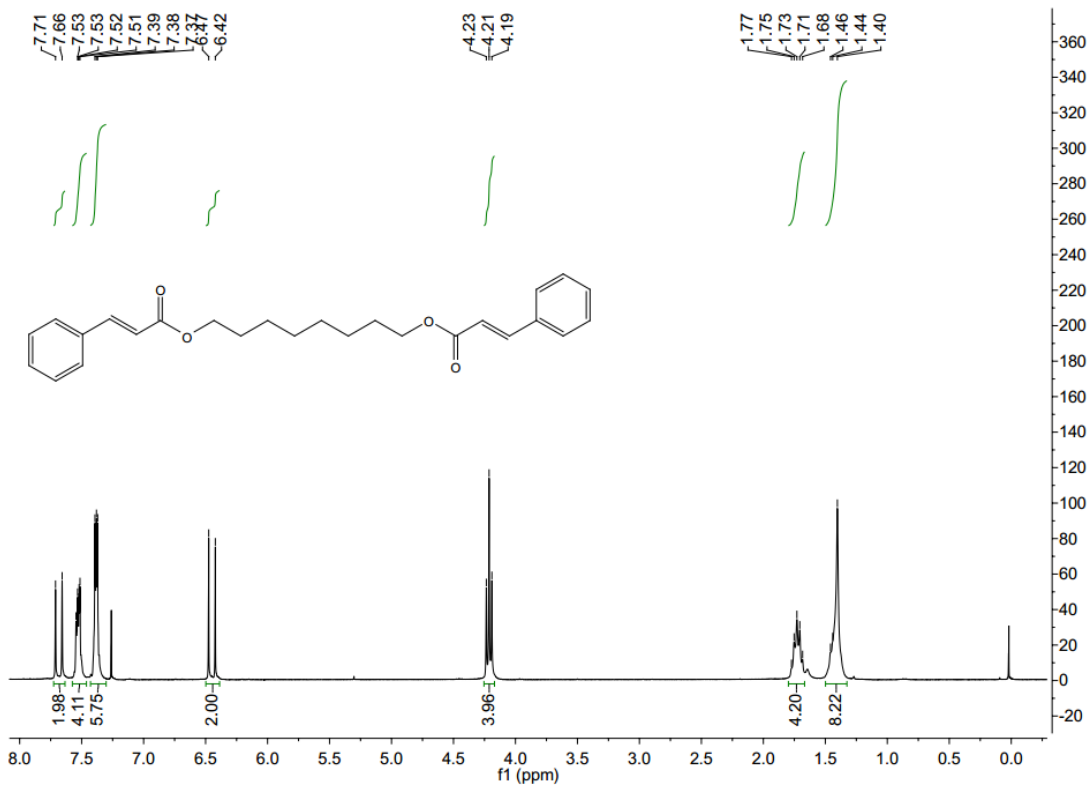

Figure S96  $^1\text{H}$  NMR spectrum of compound **9g**.



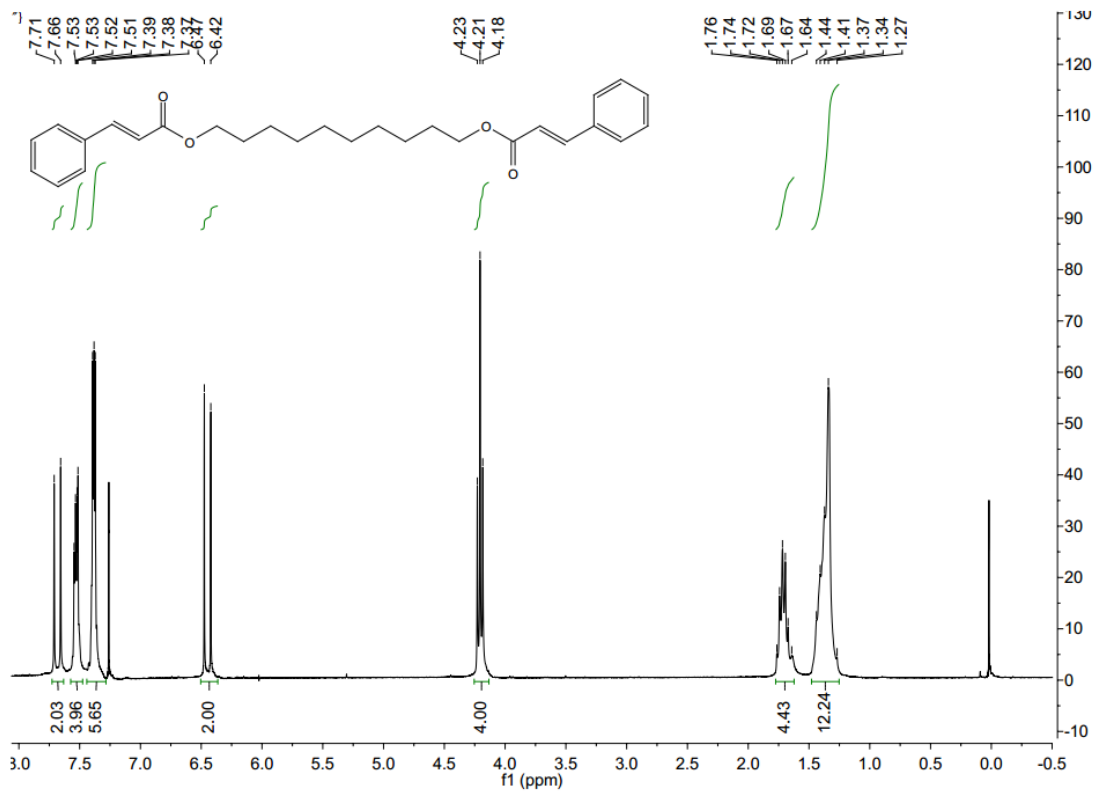

Figure S97  $^1\text{H}$  NMR spectrum of compound **9h**.

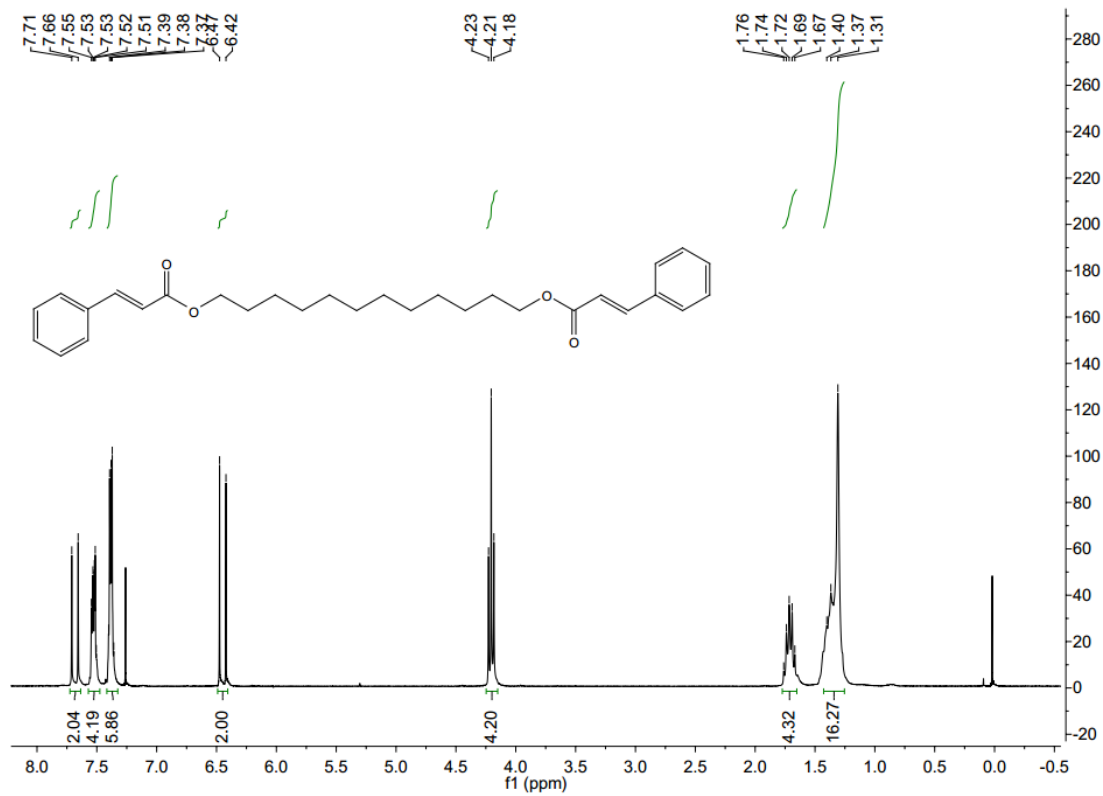

Figure S98  $^1\text{H}$  NMR spectrum of compound **9i**.

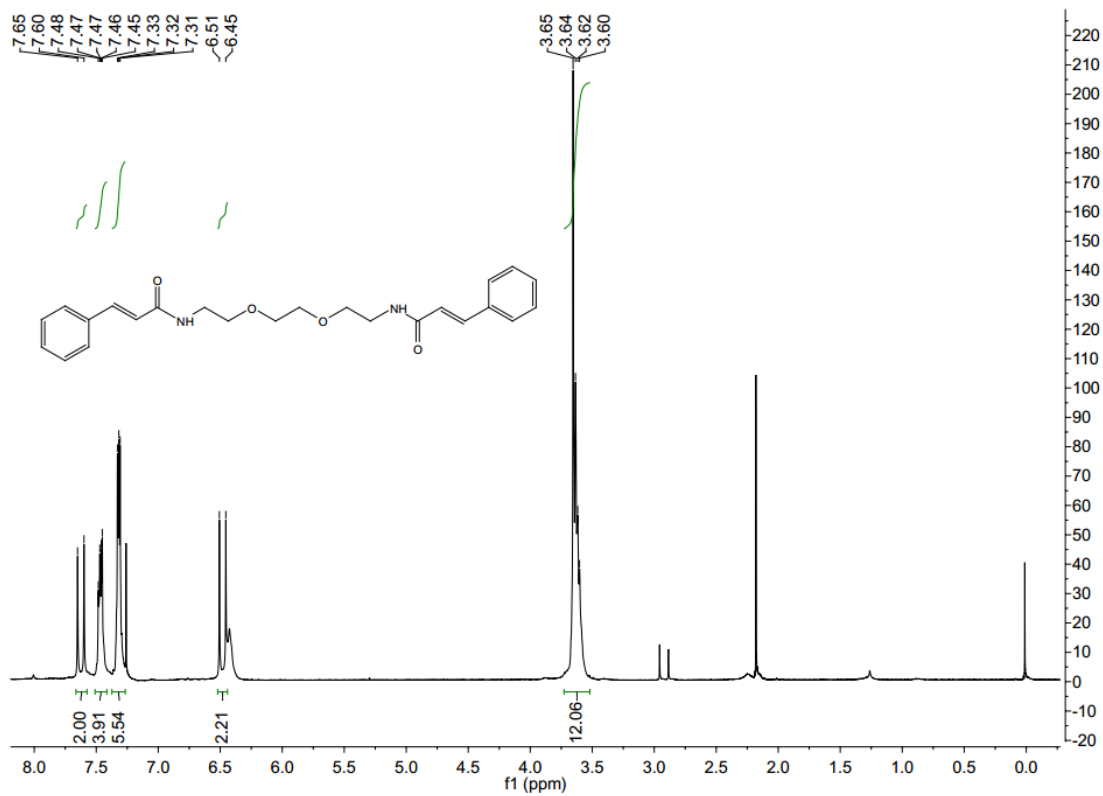

Figure S99  $^1\text{H}$  NMR spectrum of compound **9j**.

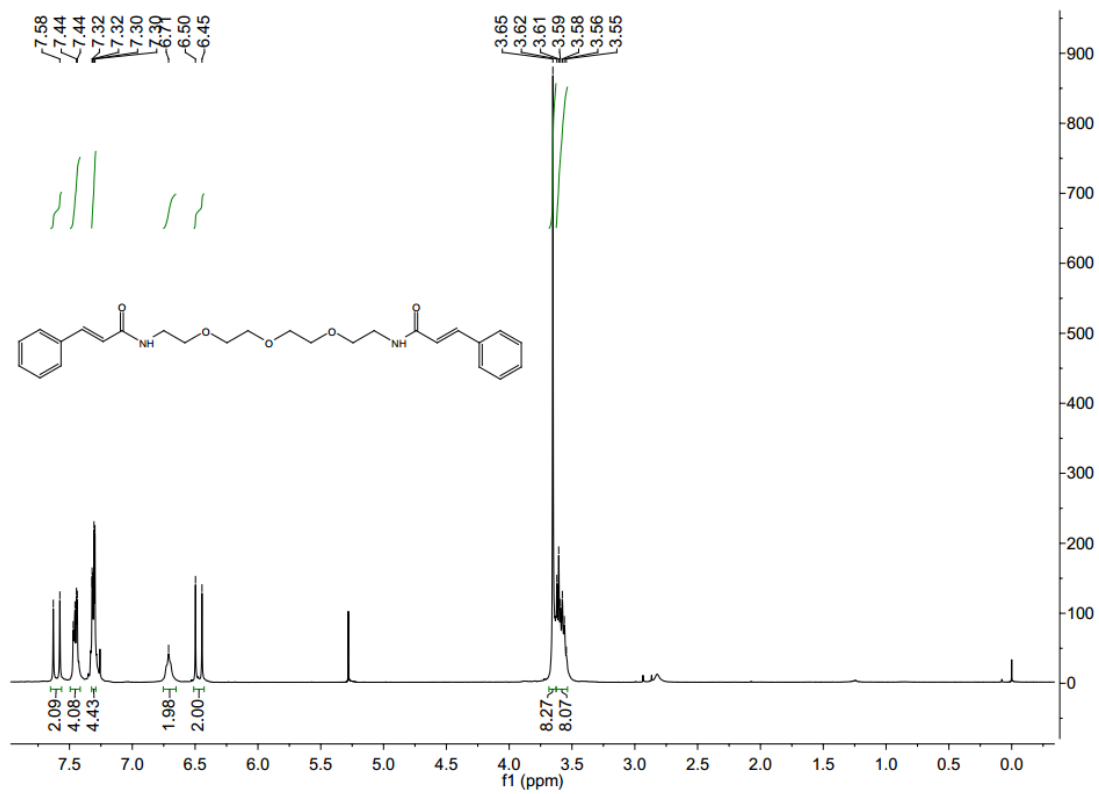

Figure S100  $^1\text{H}$  NMR spectrum of compound **9k**.

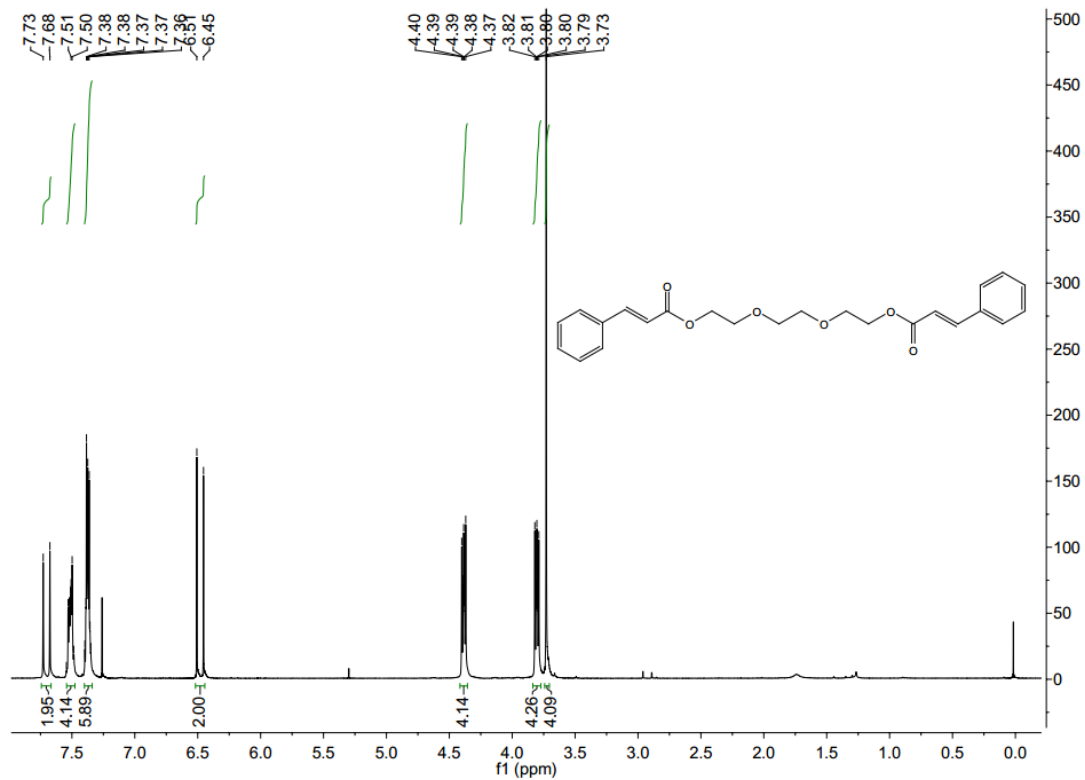

Figure S101  $^1\text{H}$  NMR spectrum of compound **9l**.

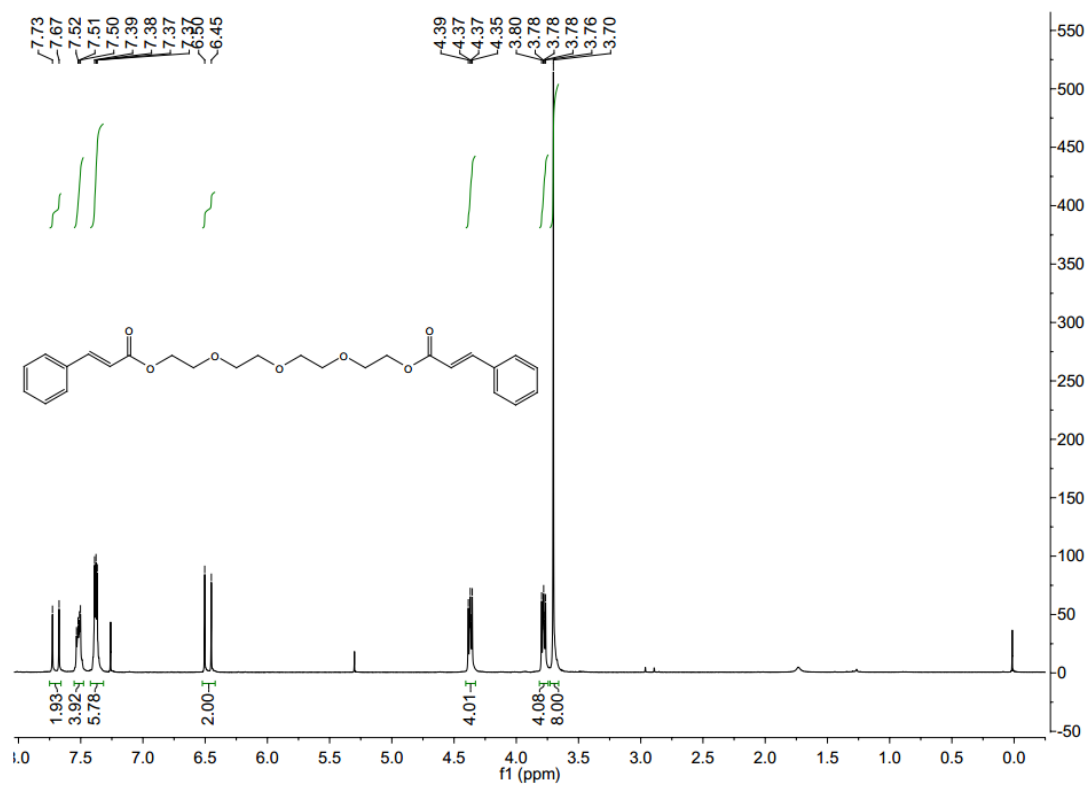

Figure S102  $^1\text{H}$  NMR spectrum of compound **9m**.

$^{13}\text{C}$ -NMR

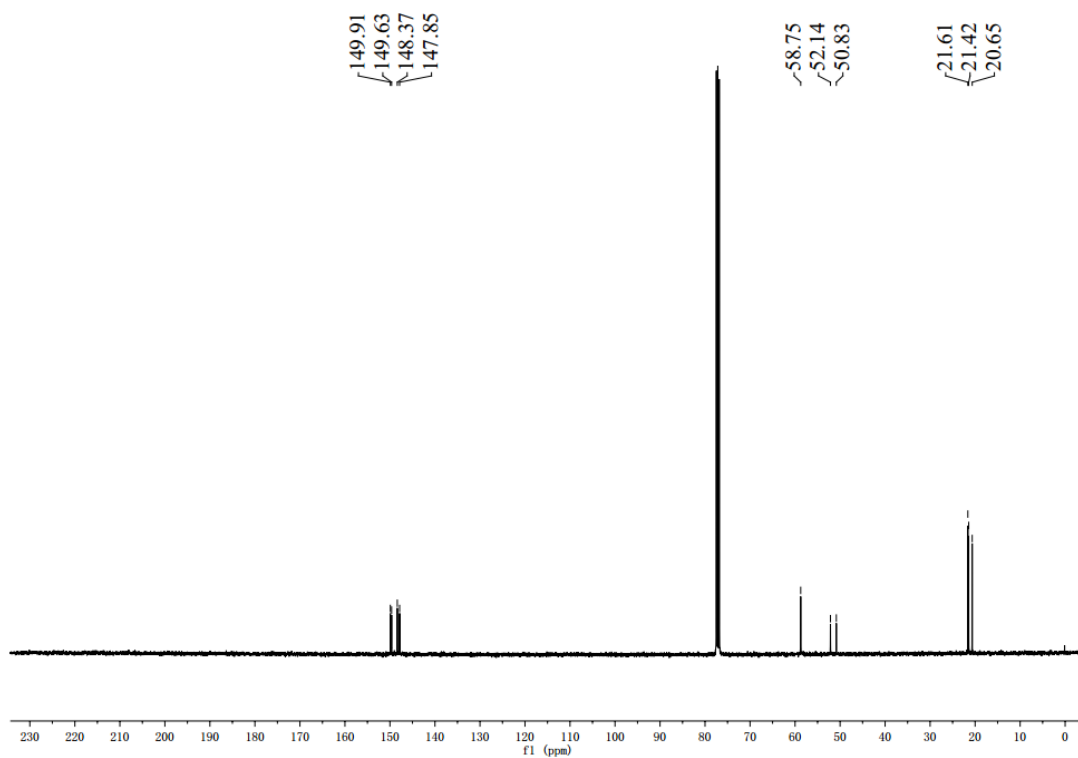

Figure S103 <sup>13</sup>C NMR spectrum of compound **6a**.

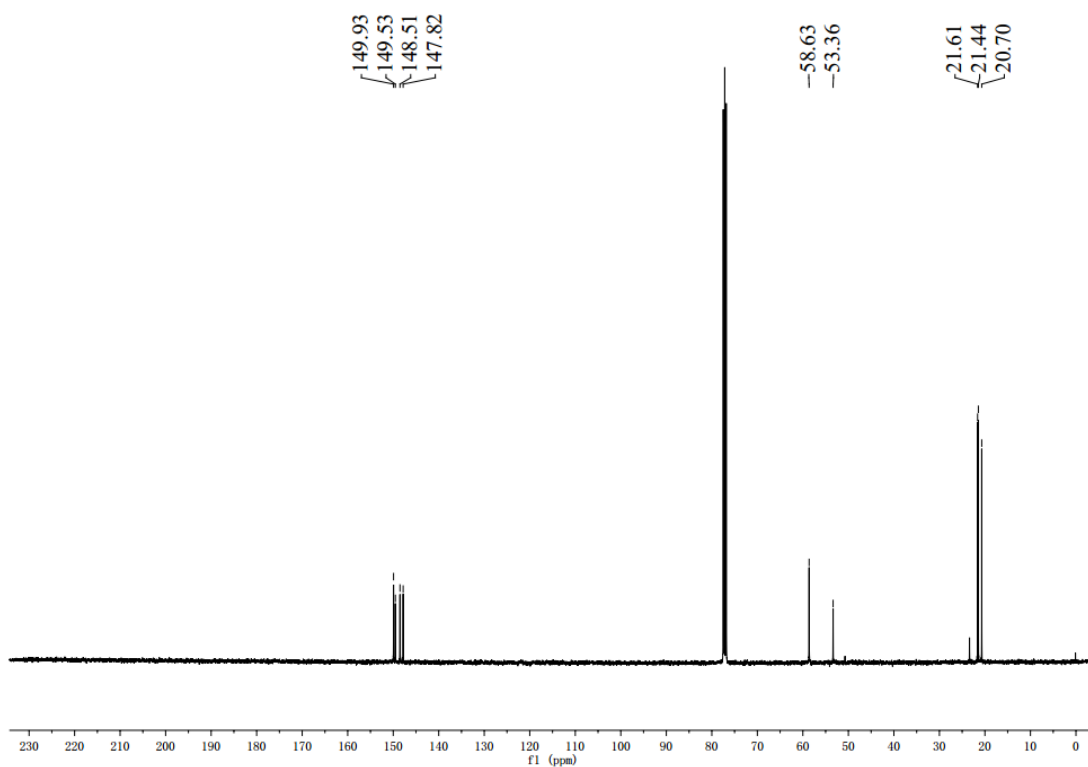

Figure S104 <sup>13</sup>C NMR spectrum of compound **6b**.

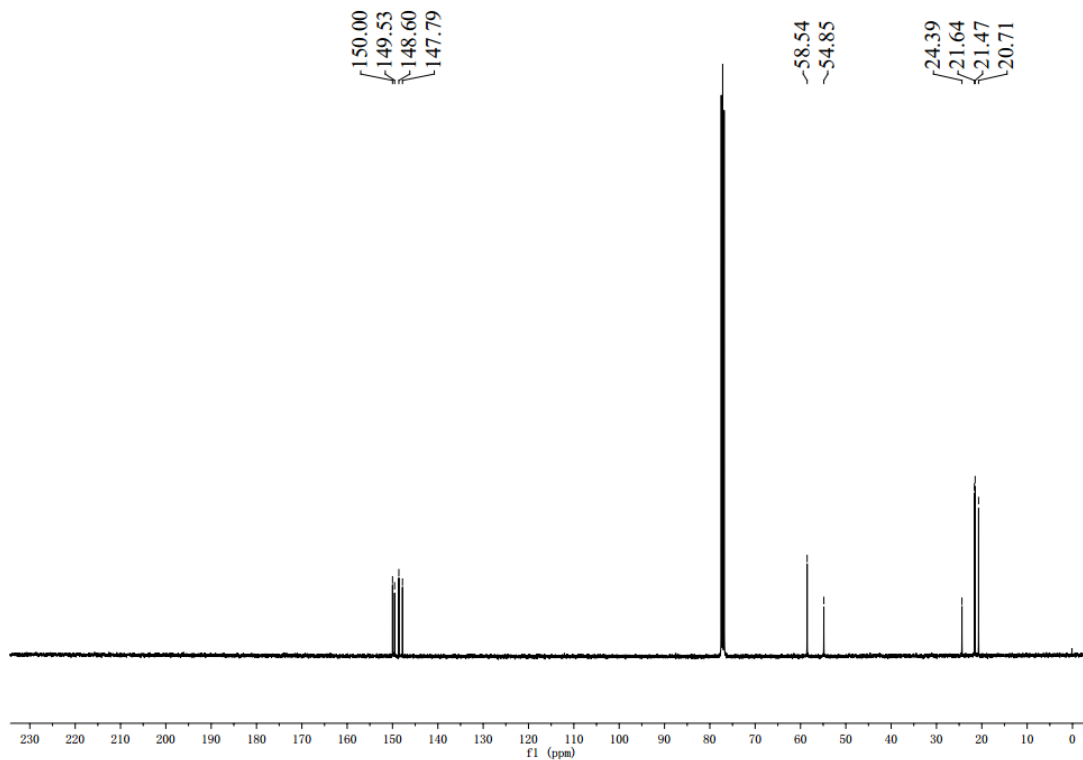

Figure S105 <sup>13</sup>C NMR spectrum of compound **6c**.

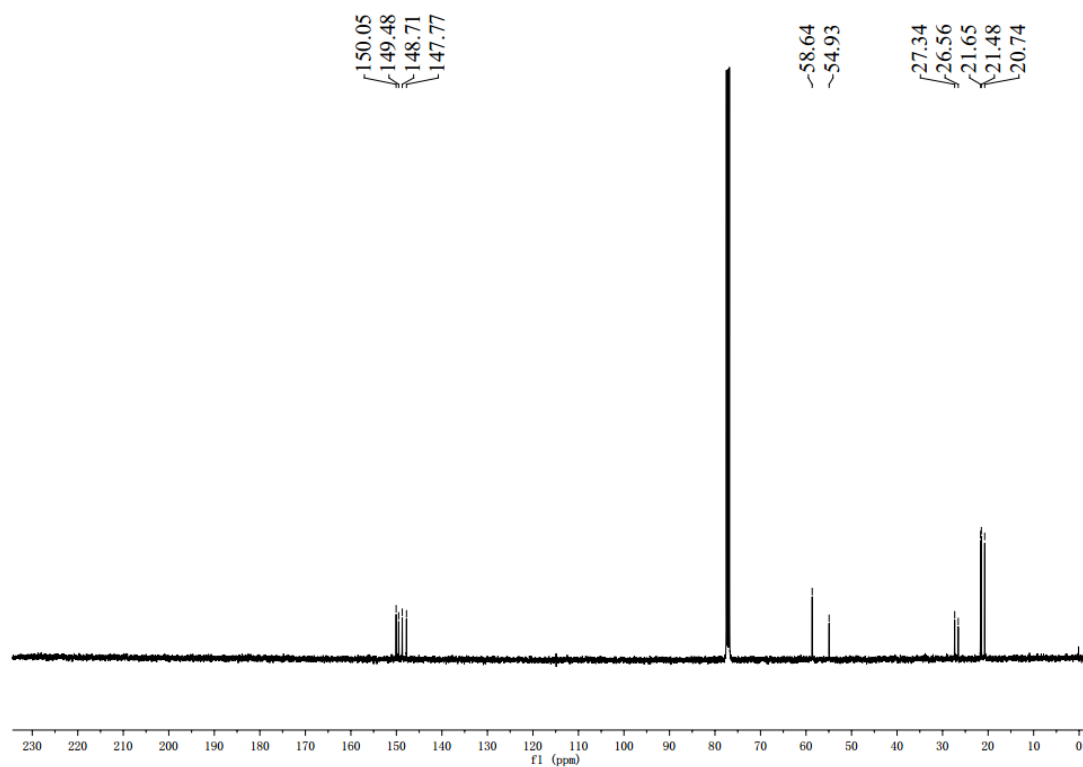

Figure S106 <sup>13</sup>C NMR spectrum of compound **6d**.

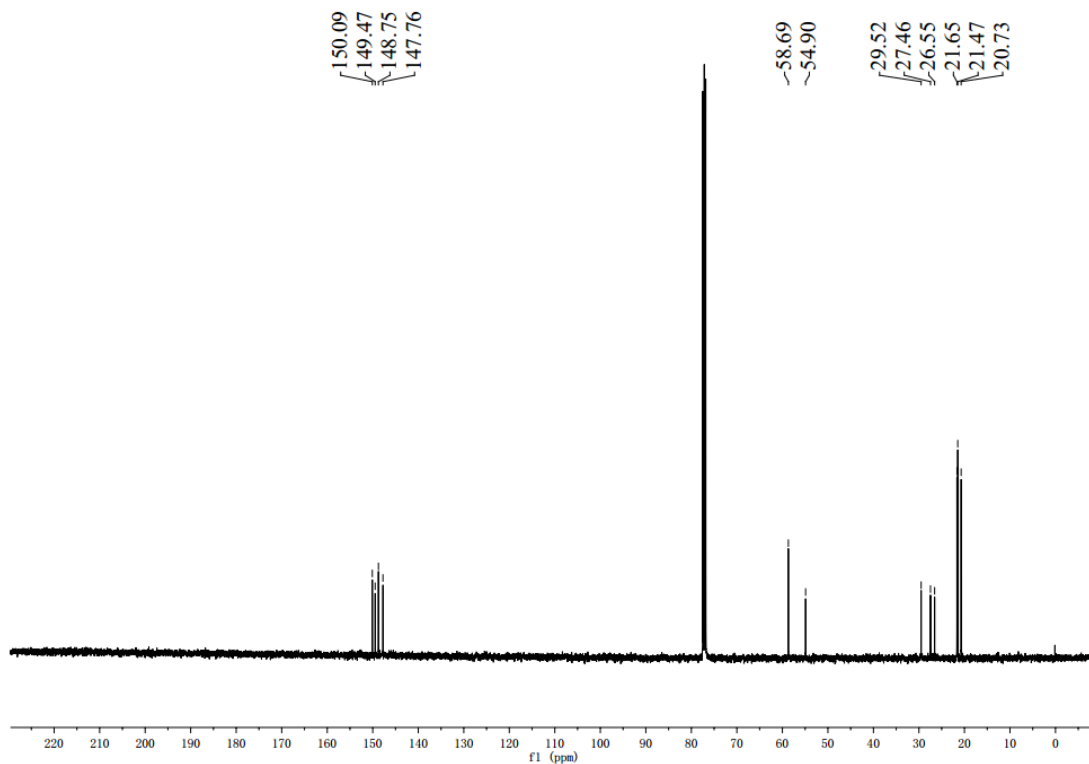

Figure S107  $^{13}\text{C}$  NMR spectrum of compound **6e**.

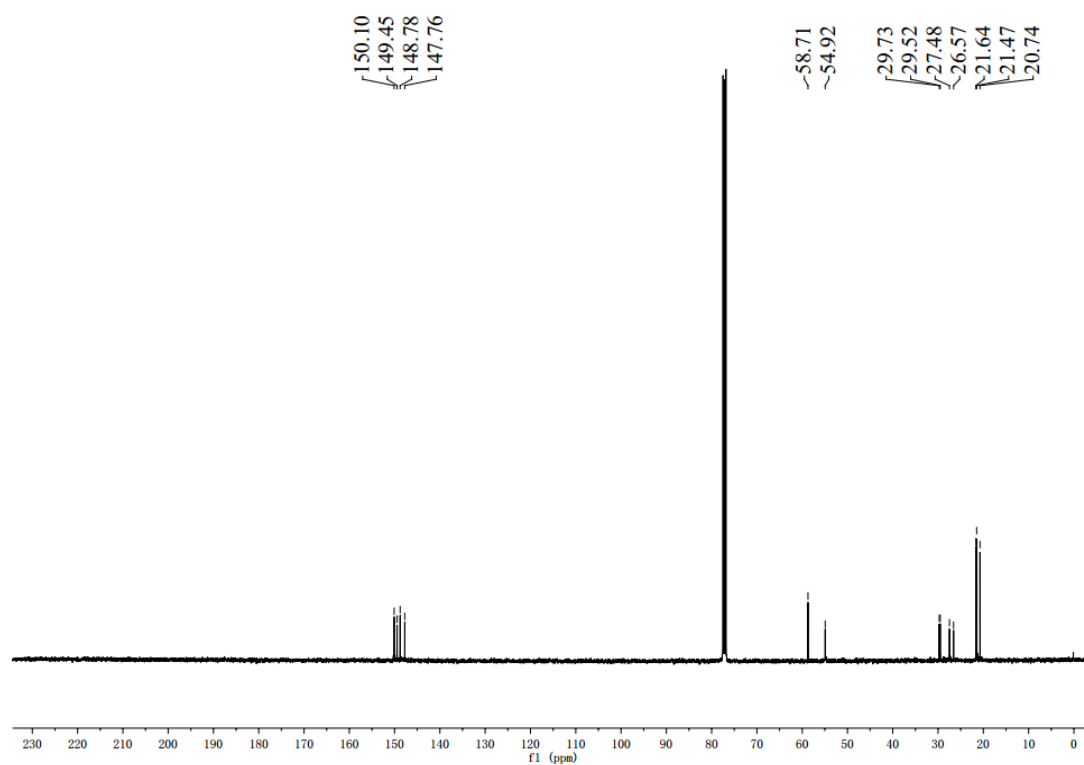

Figure S108  $^{13}\text{C}$  NMR spectrum of compound **6f**.

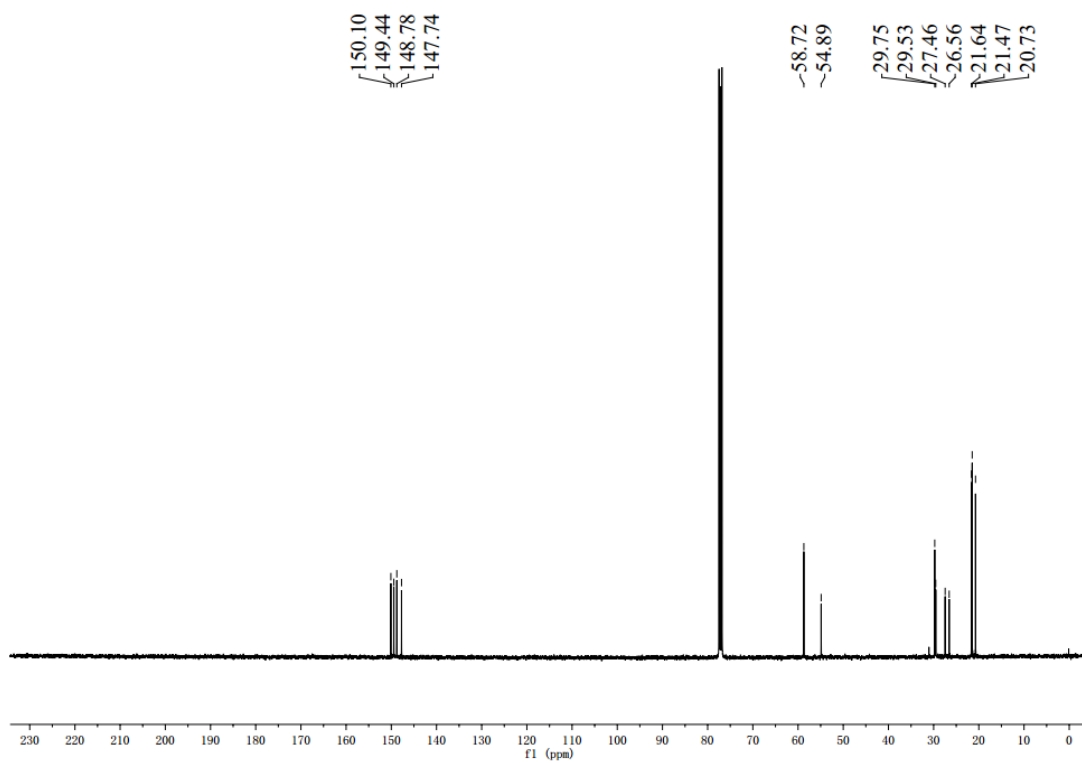

Figure S109  $^{13}\text{C}$  NMR spectrum of compound **6g**.

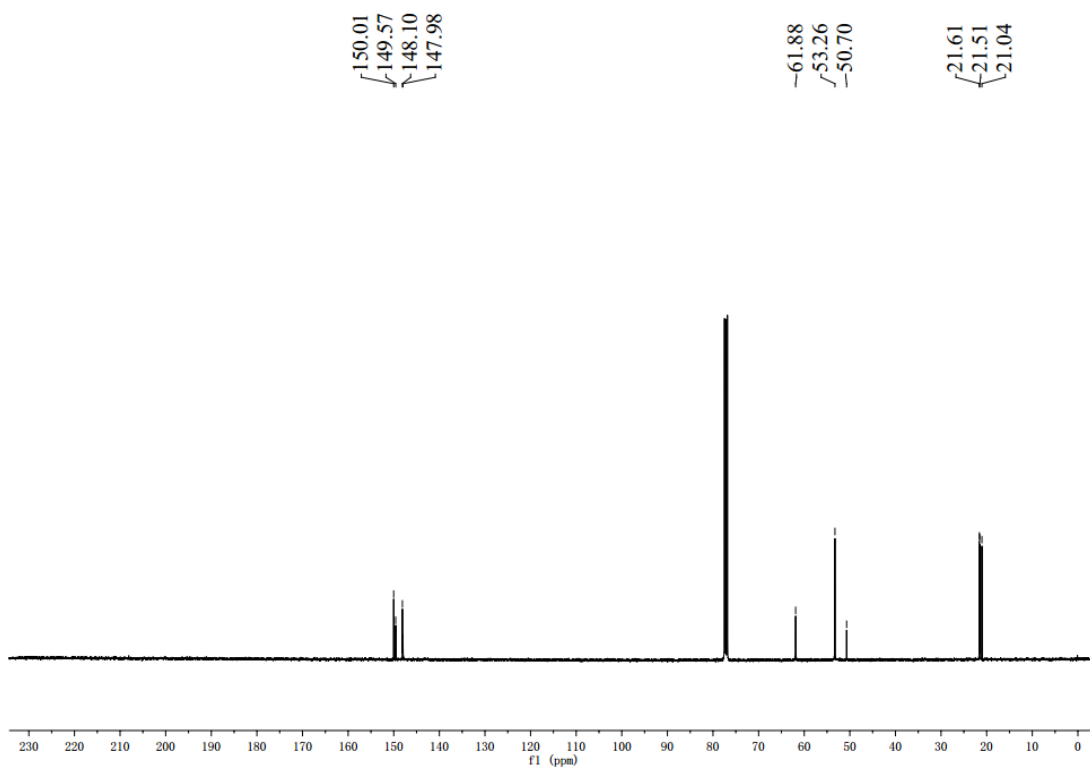

Figure S110  $^{13}\text{C}$  NMR spectrum of compound **6h**.

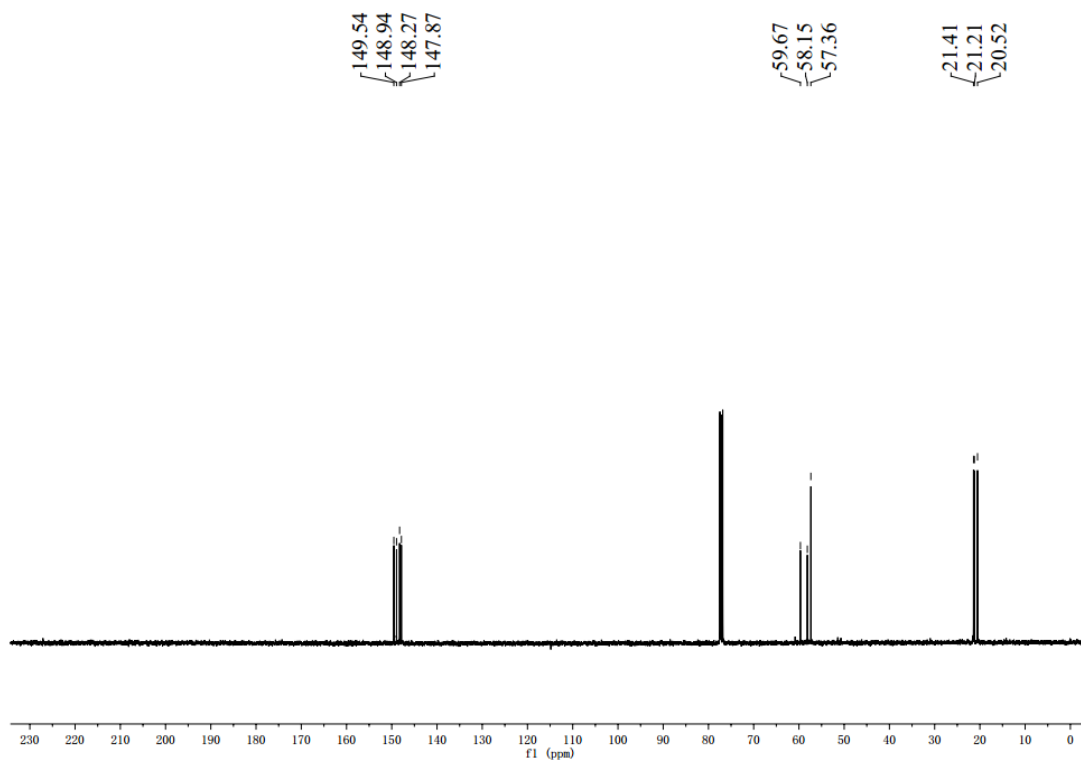

Figure S111  $^{13}\text{C}$  NMR spectrum of compound **6i**.

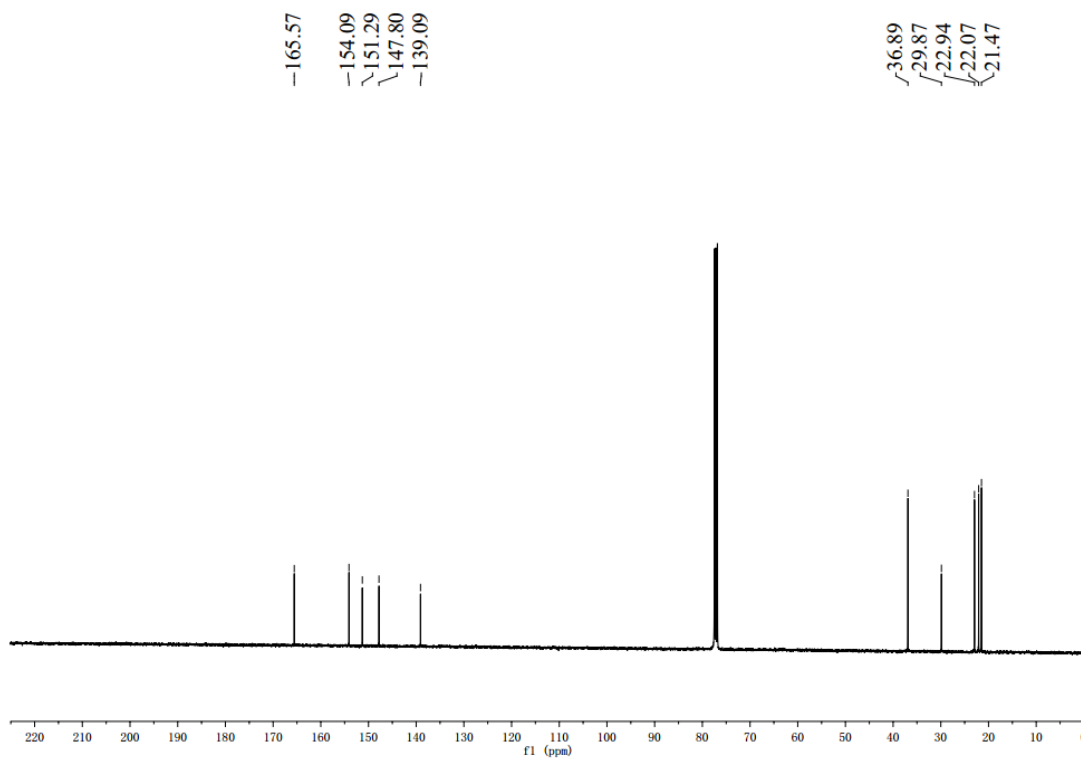

Figure S112  $^{13}\text{C}$  NMR spectrum of compound **8a**.



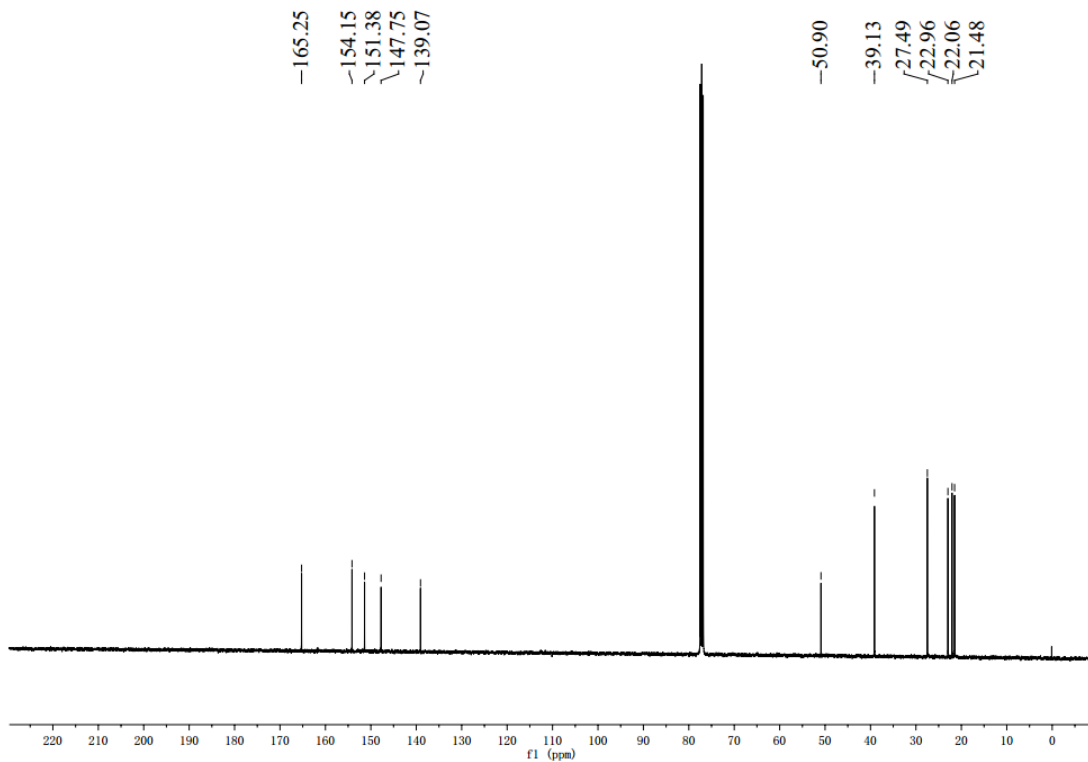

Figure S113  $^{13}\text{C}$  NMR spectrum of compound **8b**.

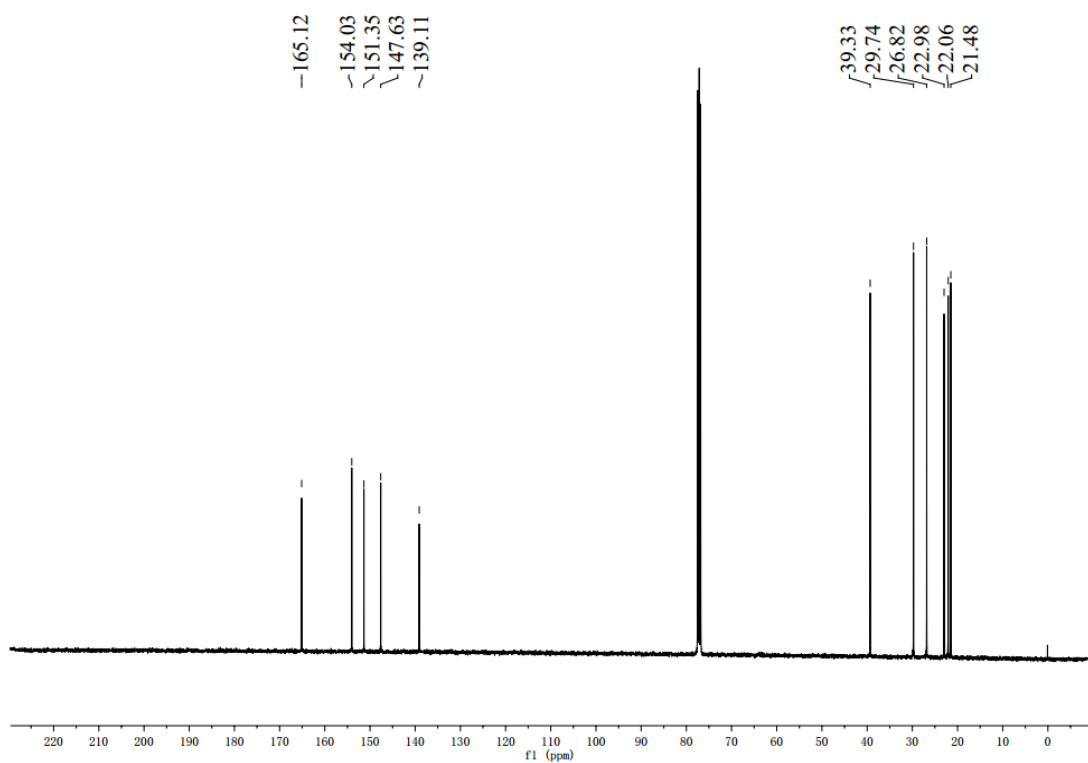

Figure S114  $^{13}\text{C}$  NMR spectrum of compound **8c**.

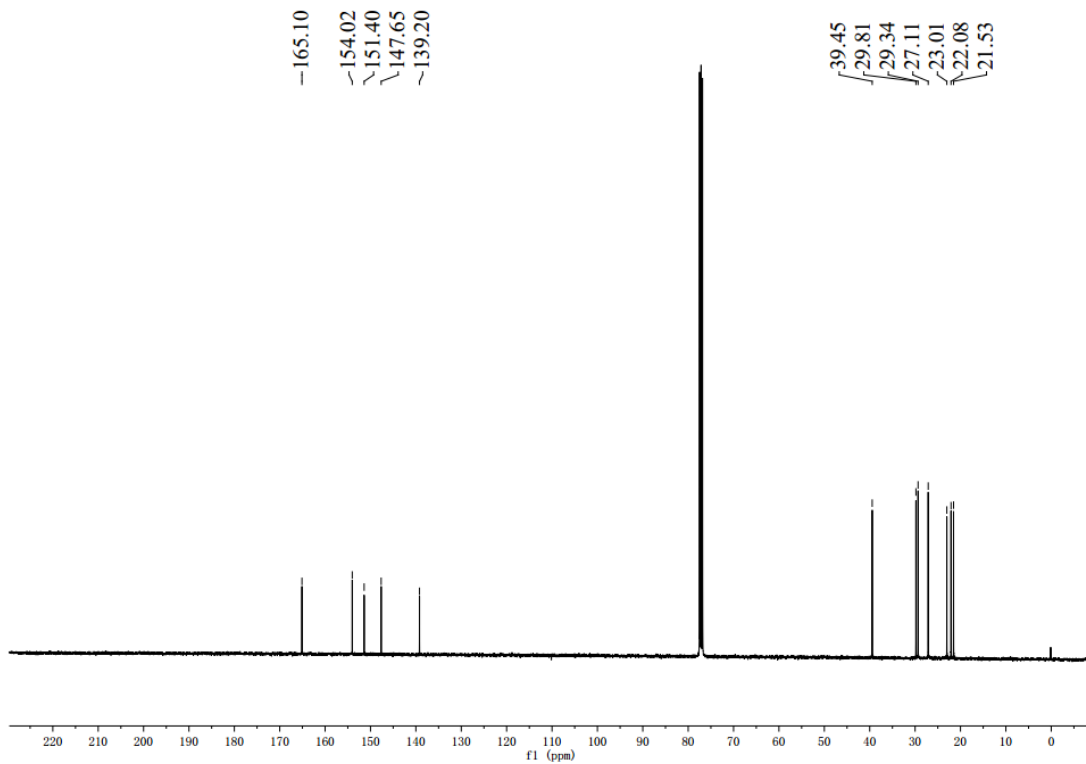

Figure S115 <sup>13</sup>C NMR spectrum of compound **8d**.

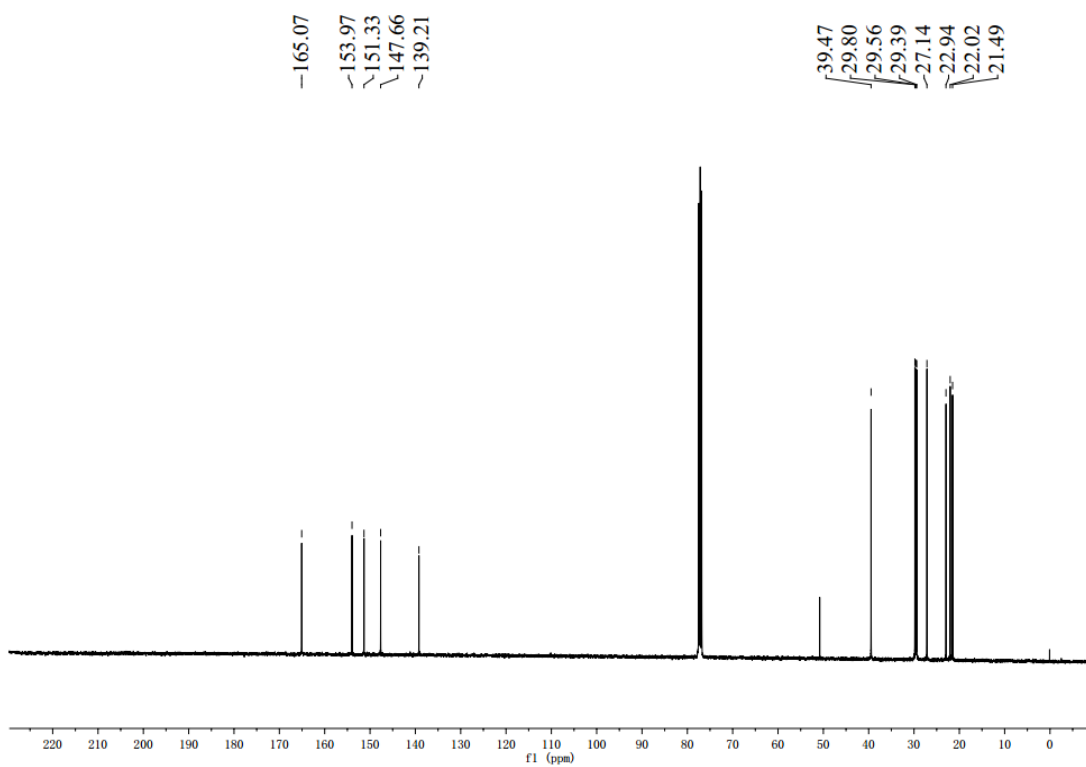

Figure S116 <sup>13</sup>C NMR spectrum of compound **8e**.

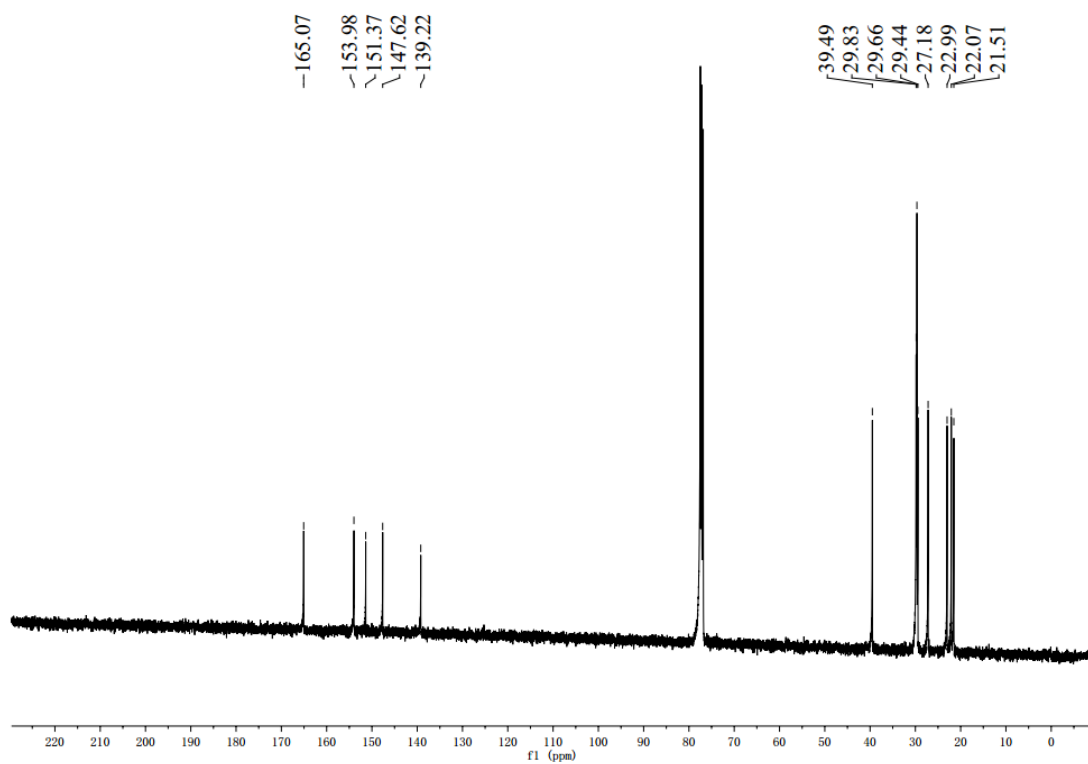

Figure S117  $^{13}\text{C}$  NMR spectrum of compound **8f**.

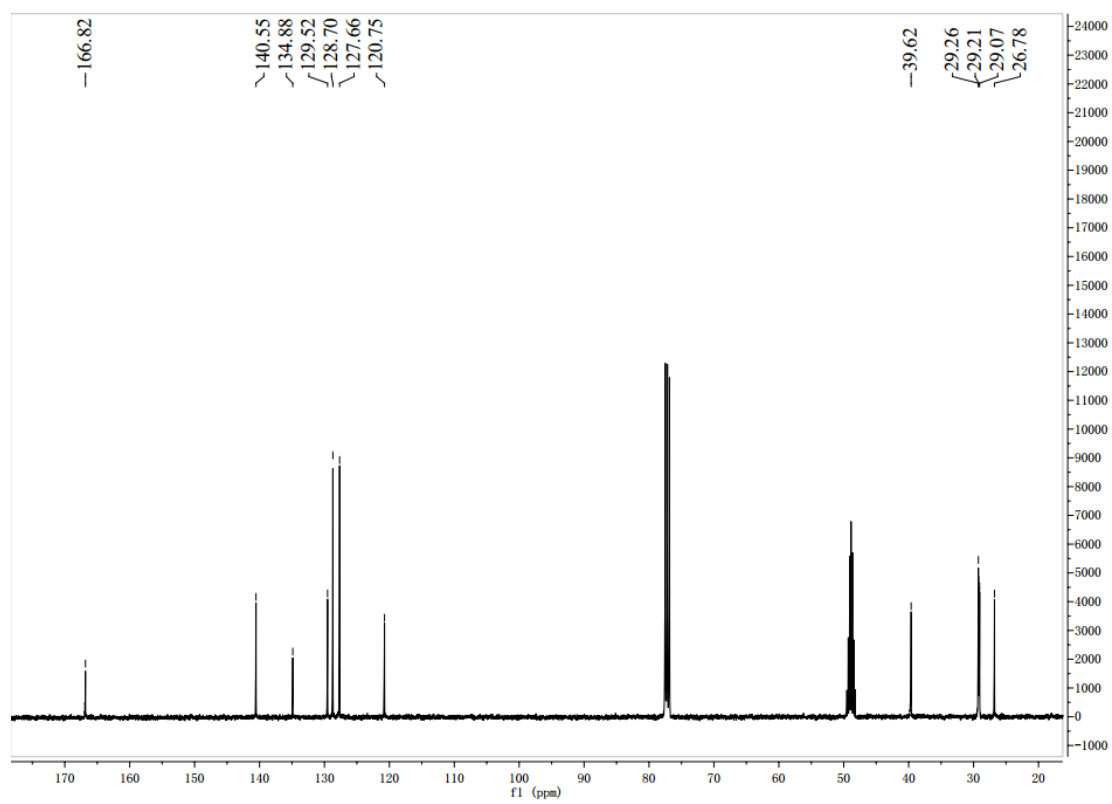

Figure S118  $^{13}\text{C}$  NMR spectrum of compound **9e**.

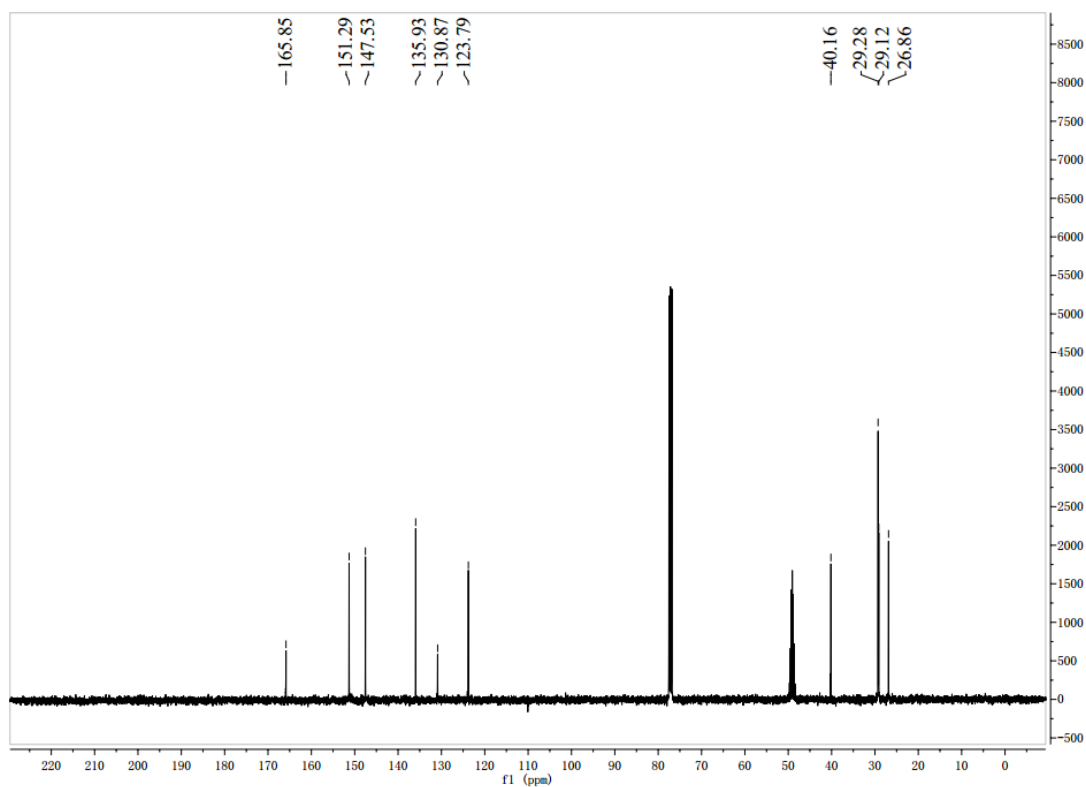

Figure S119  $^{13}\text{C}$  NMR spectrum of compound **10e**.

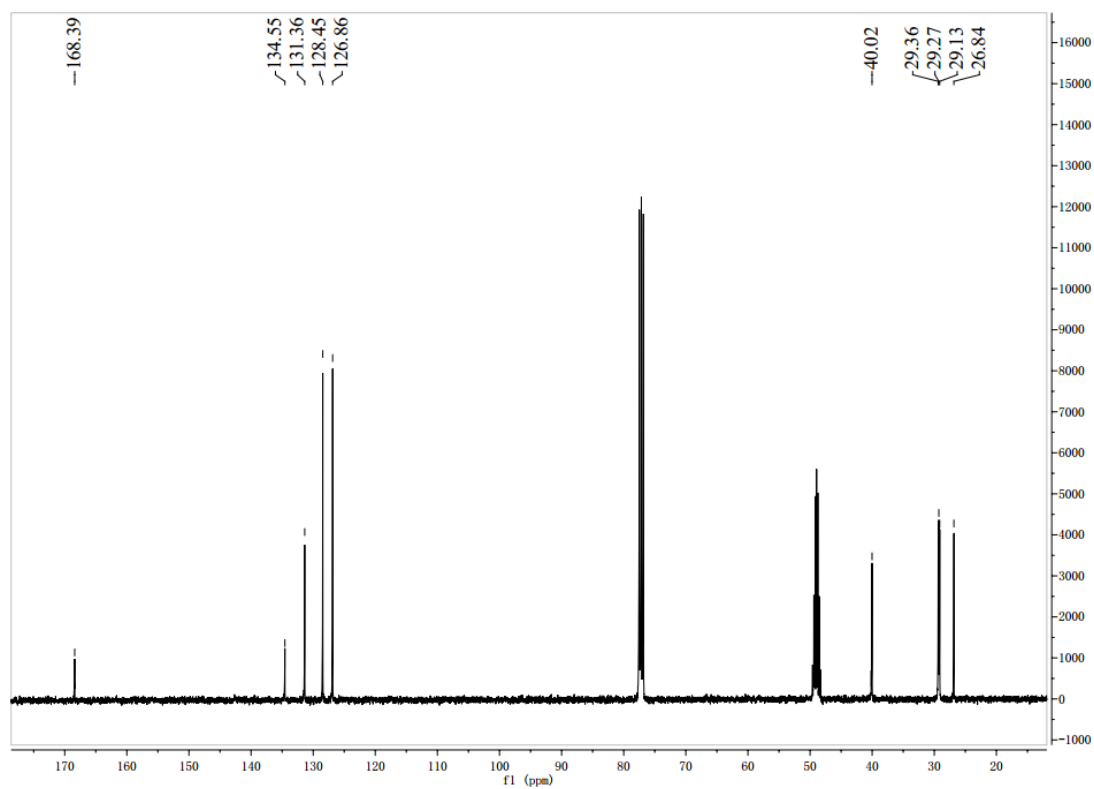

Figure S120  $^{13}\text{C}$  NMR spectrum of compound **11e**.

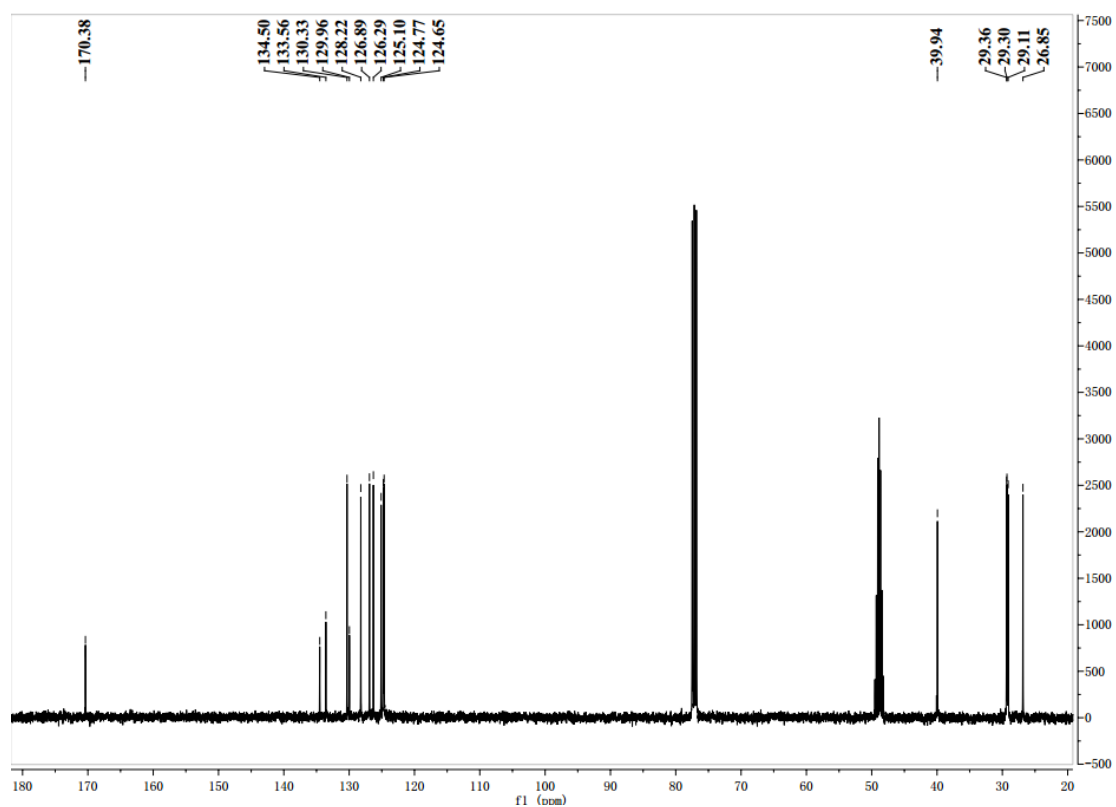

Figure S121  $^{13}\text{C}$  NMR spectrum of compound **12e**.

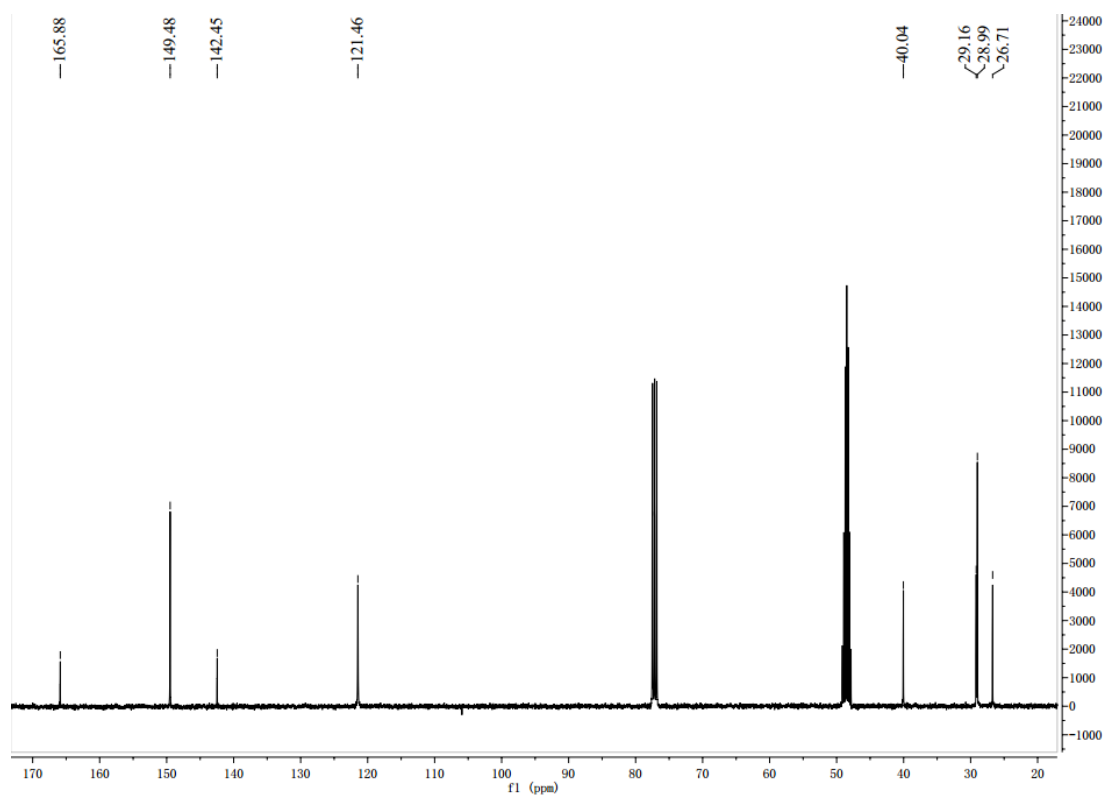

Figure S122  $^{13}\text{C}$  NMR spectrum of compound **13e**.

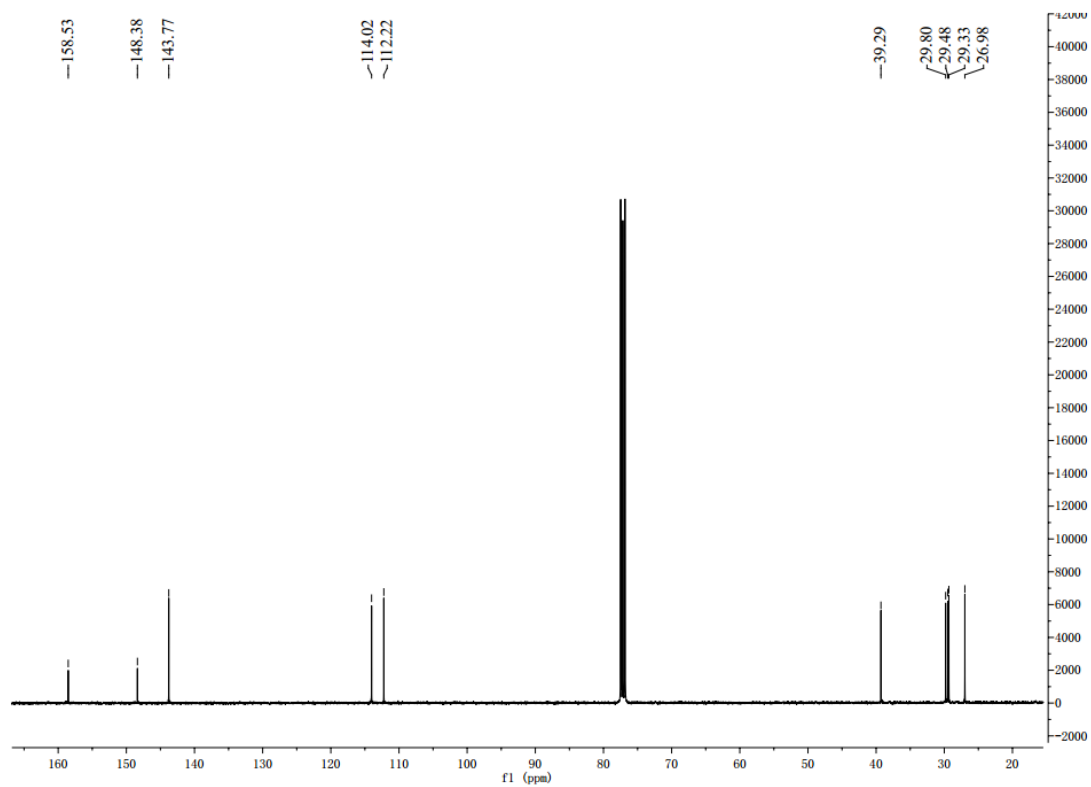

Figure S123  $^{13}\text{C}$  NMR spectrum of compound **14e**.

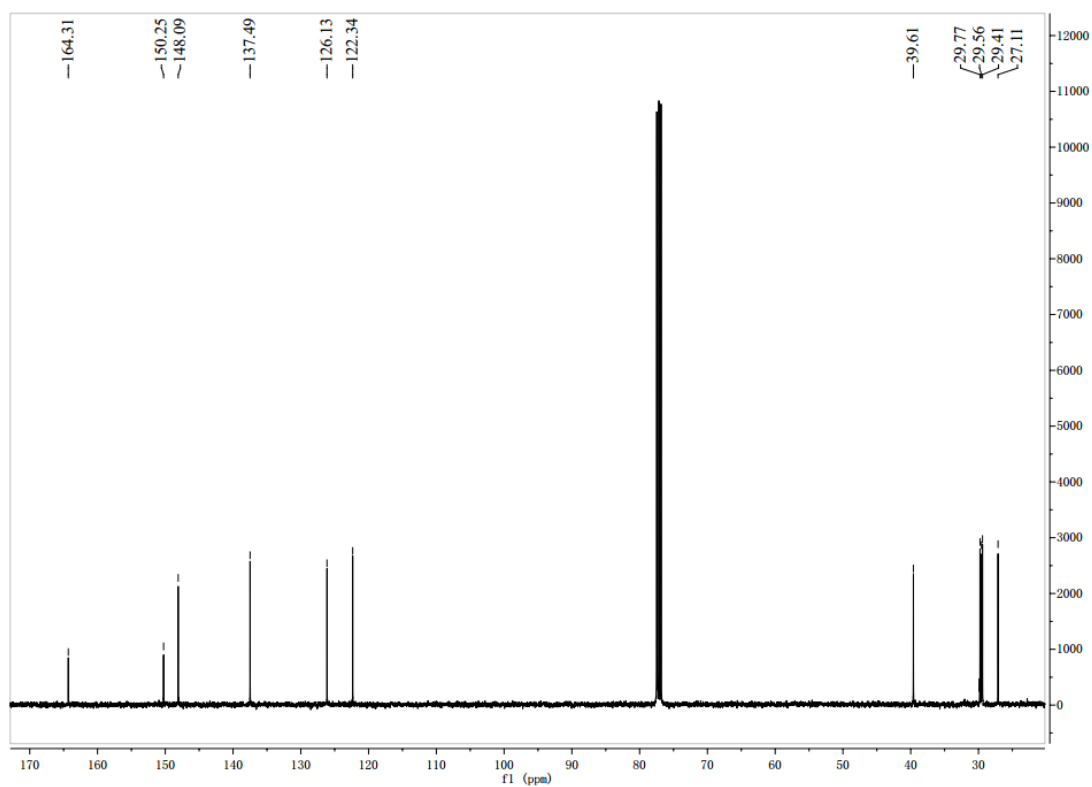

Figure S124  $^{13}\text{C}$  NMR spectrum of compound **15e**.

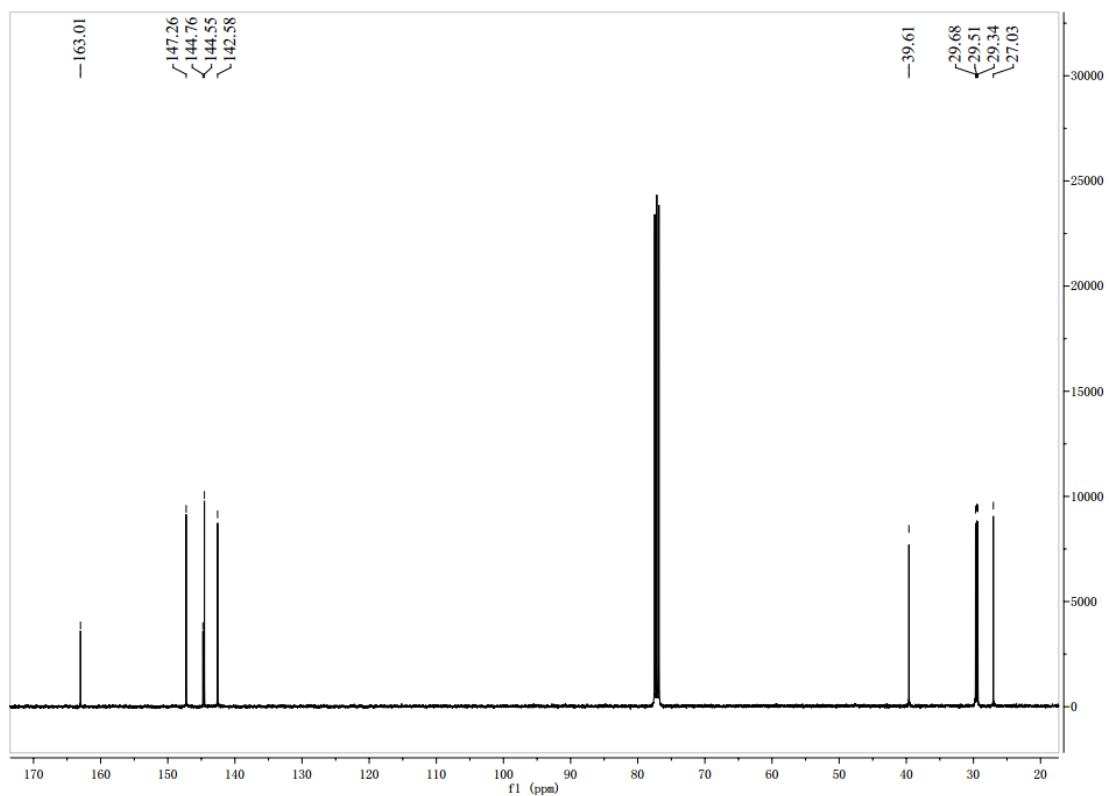

Figure S125  $^{13}\text{C}$  NMR spectrum of compound **16e**.

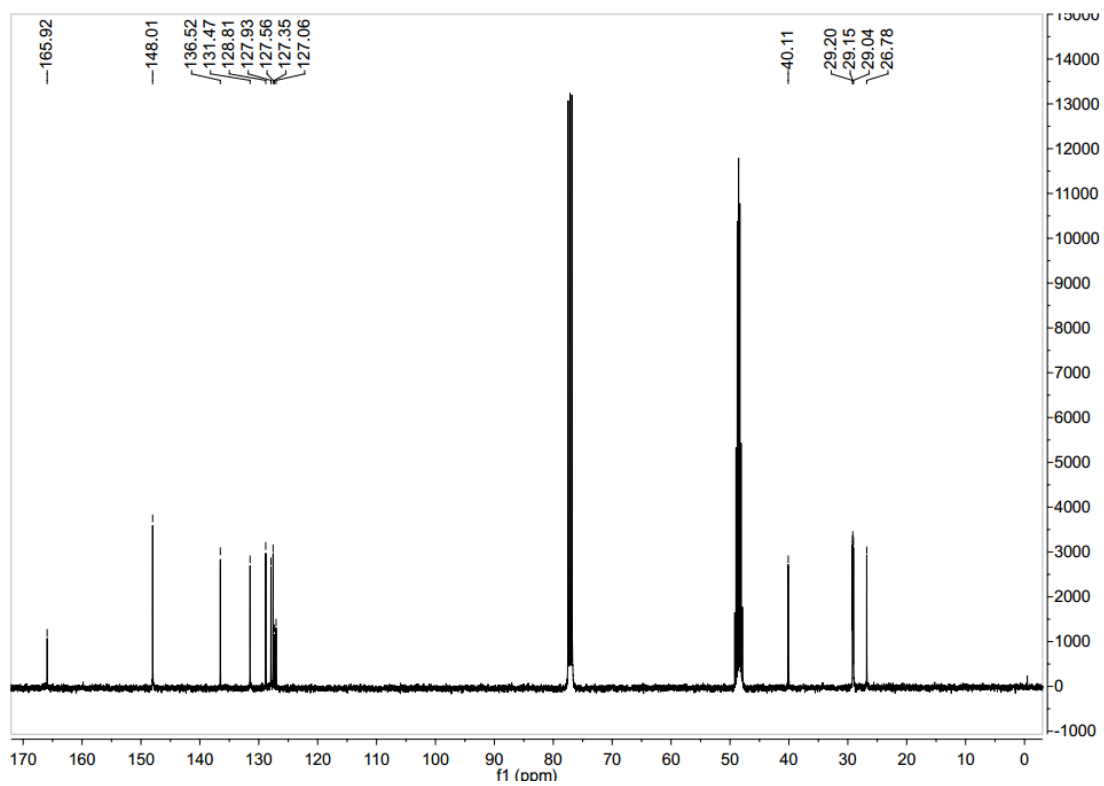

Figure S126  $^{13}\text{C}$  NMR spectrum of compound **17e**.

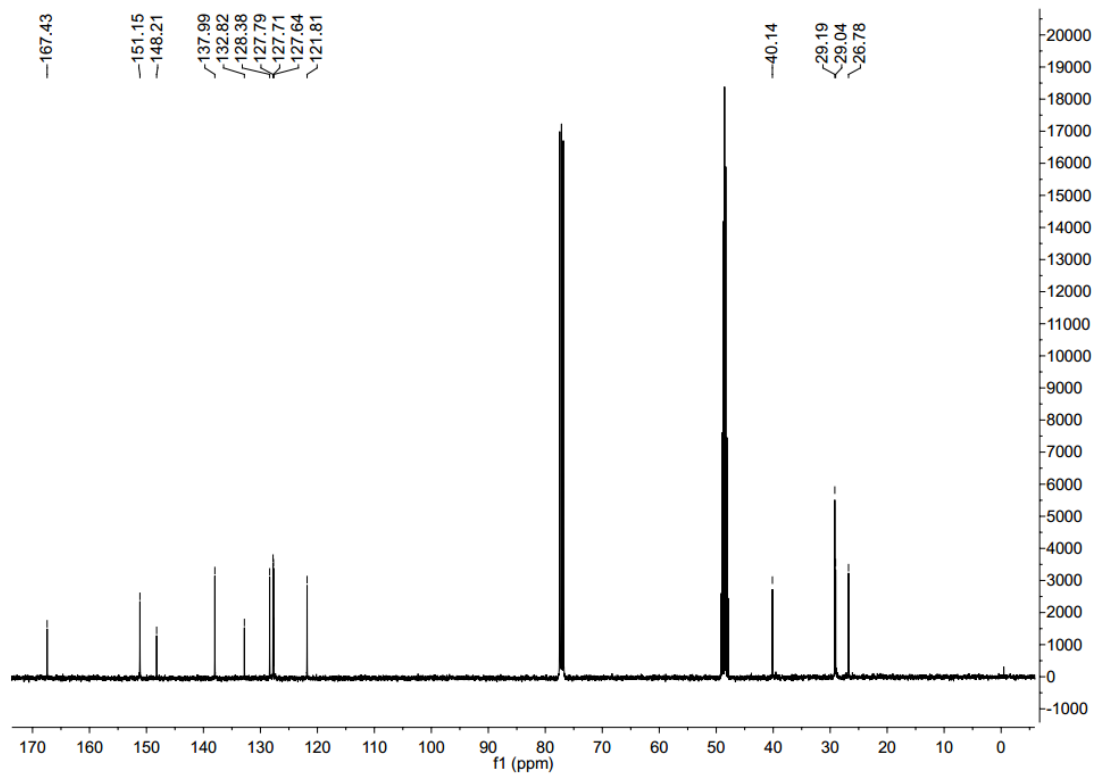

Figure S127  $^{13}\text{C}$  NMR spectrum of compound **18e**.

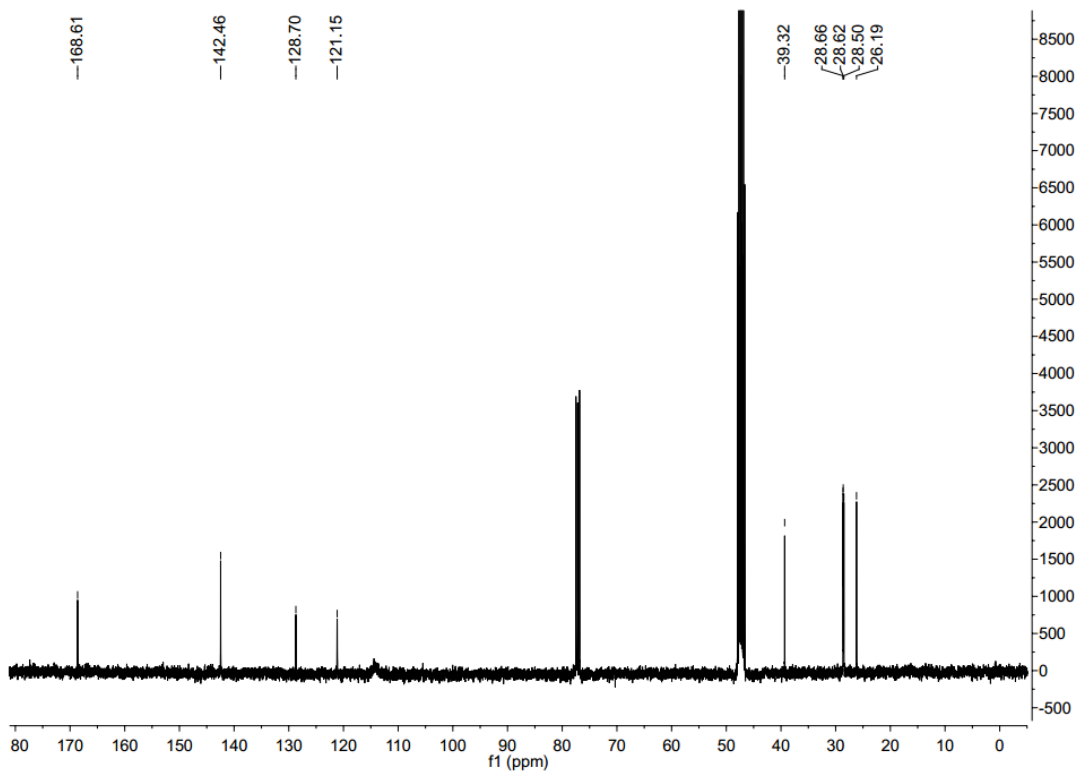

Figure S128  $^{13}\text{C}$  NMR spectrum of compound **19e**.



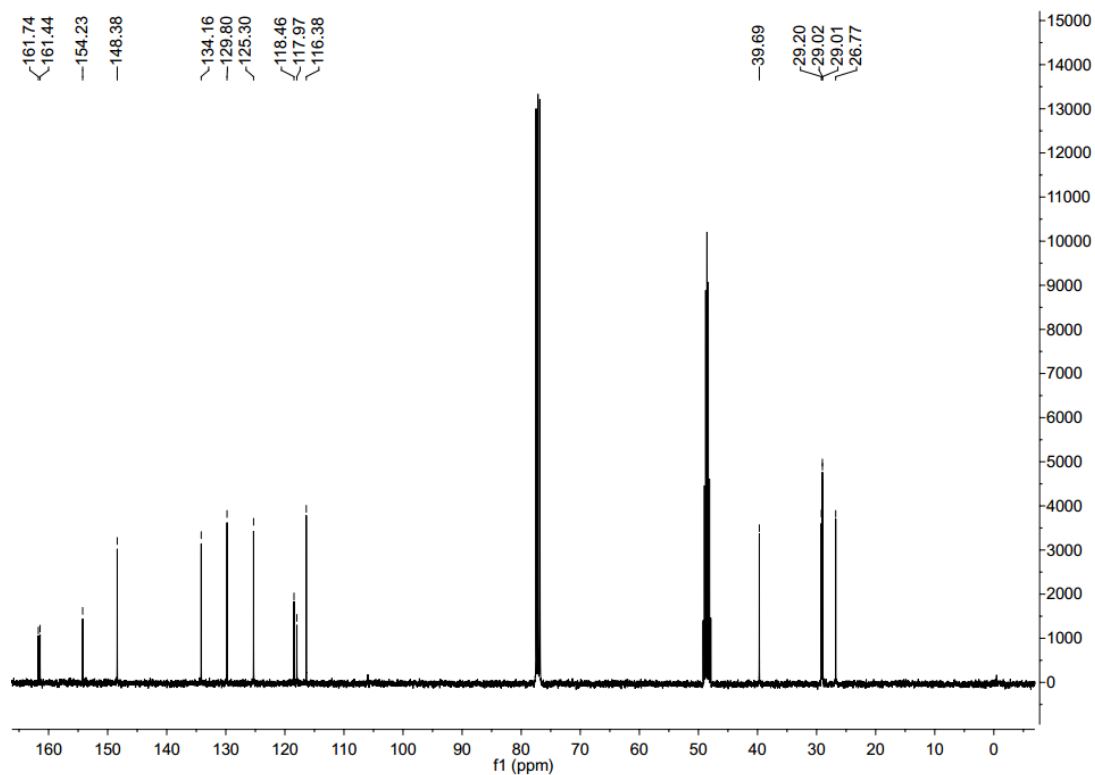

Figure S129  $^{13}\text{C}$  NMR spectrum of compound **20e**.

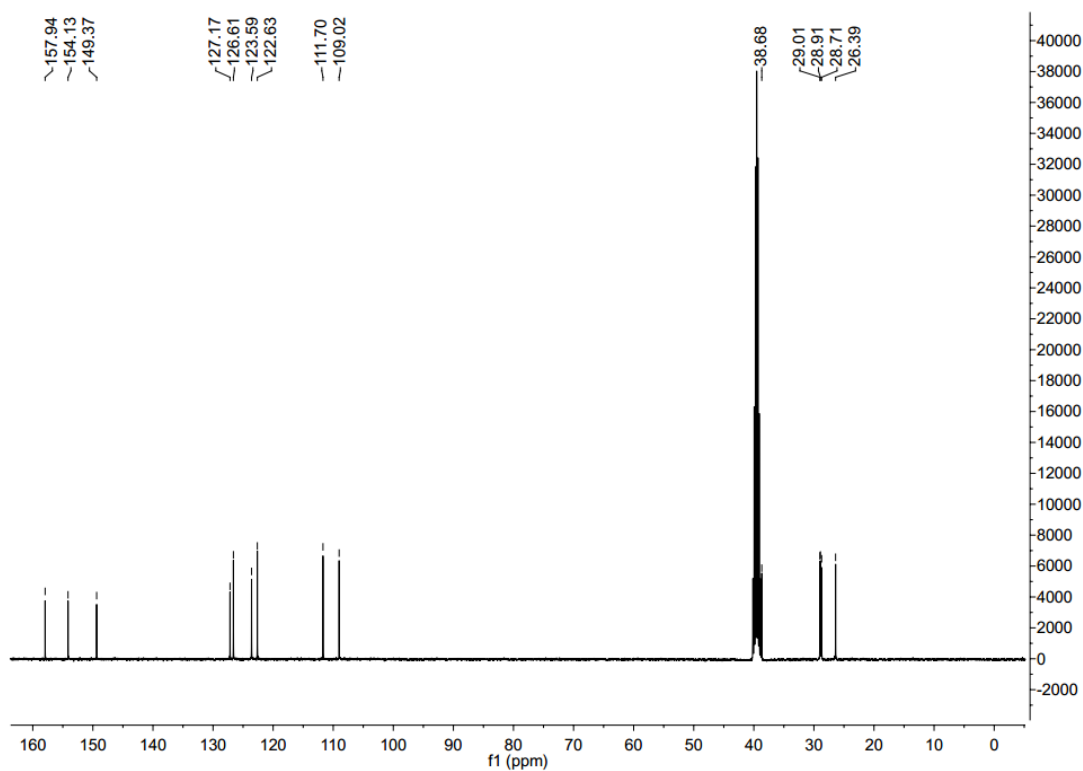

Figure S130  $^{13}\text{C}$  NMR spectrum of compound **21e**.

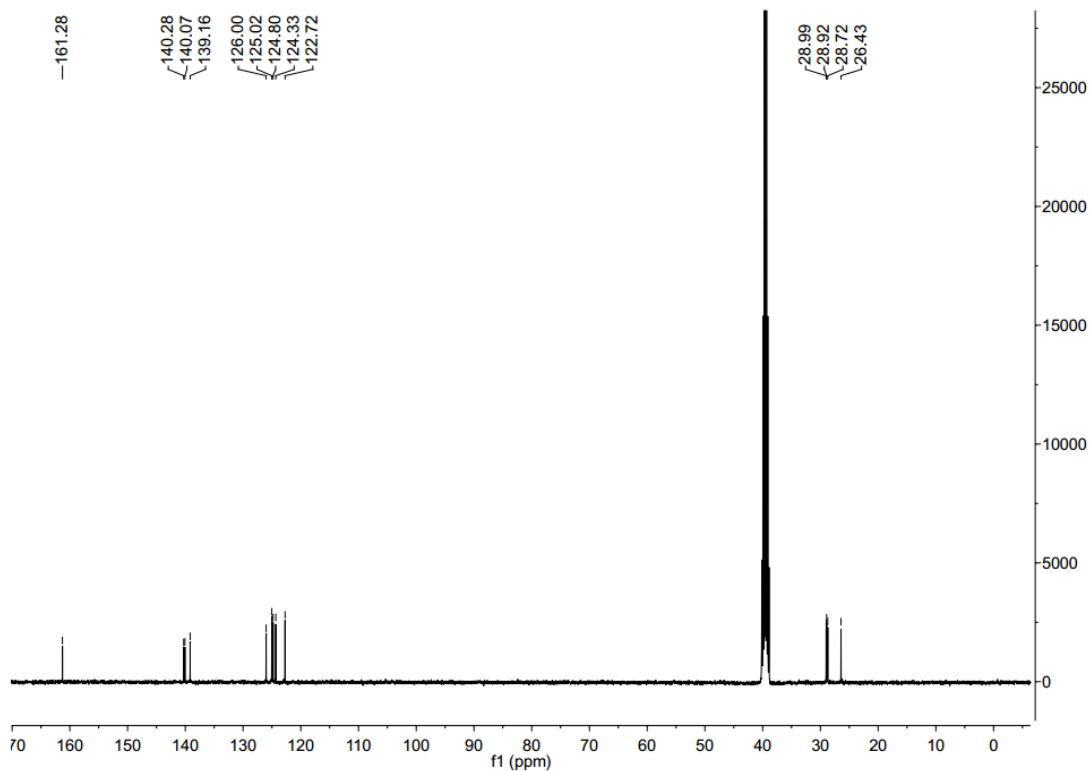

Figure S131 <sup>13</sup>C NMR spectrum of compound **22e**.

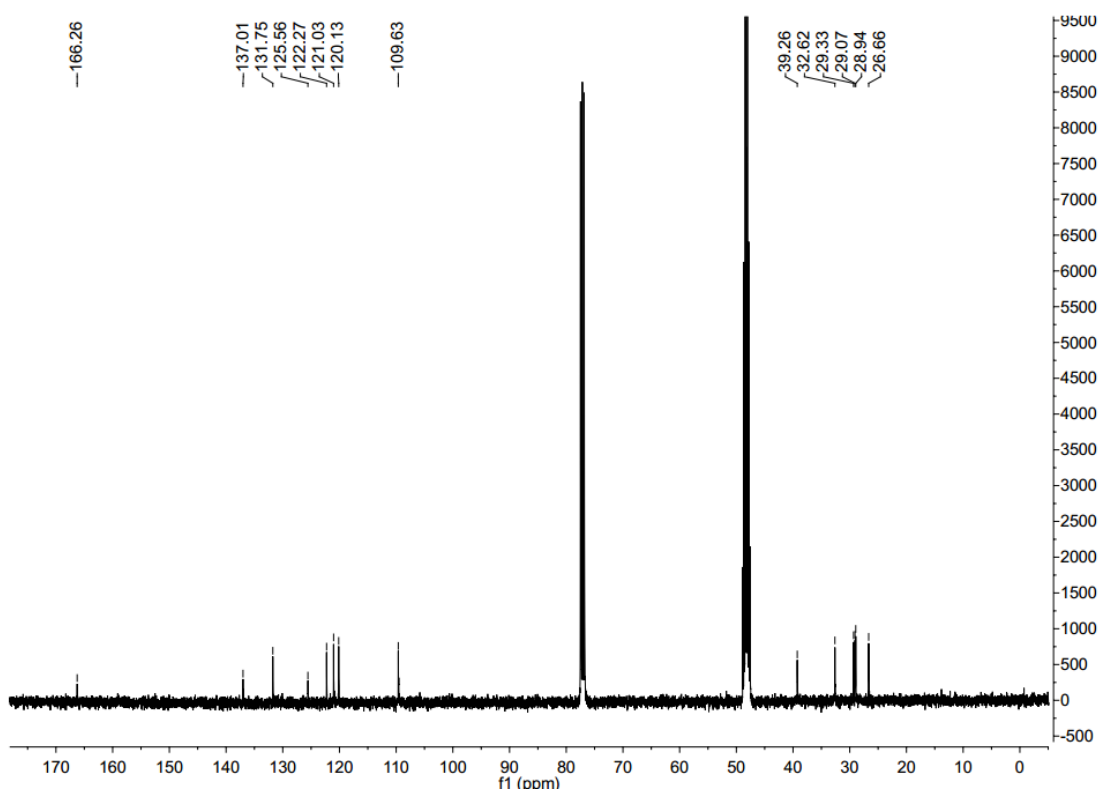

Figure S132 <sup>13</sup>C NMR spectrum of compound **23e**.

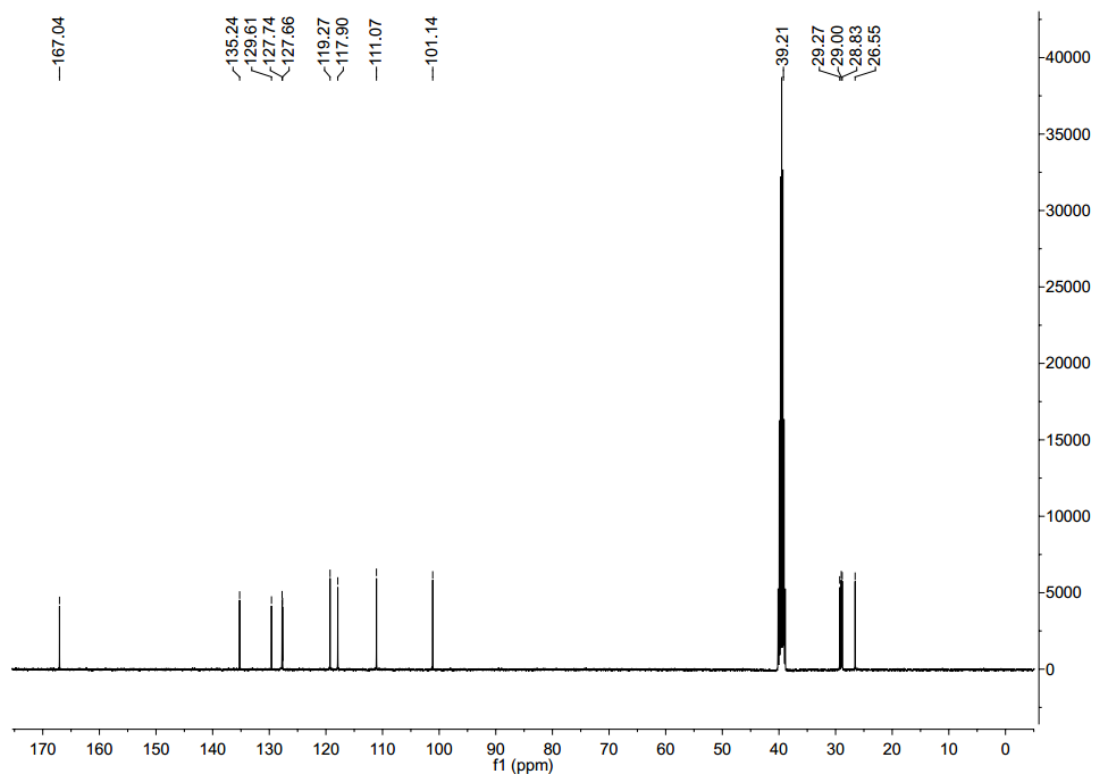

Figure S133  $^{13}\text{C}$  NMR spectrum of compound **24e**.

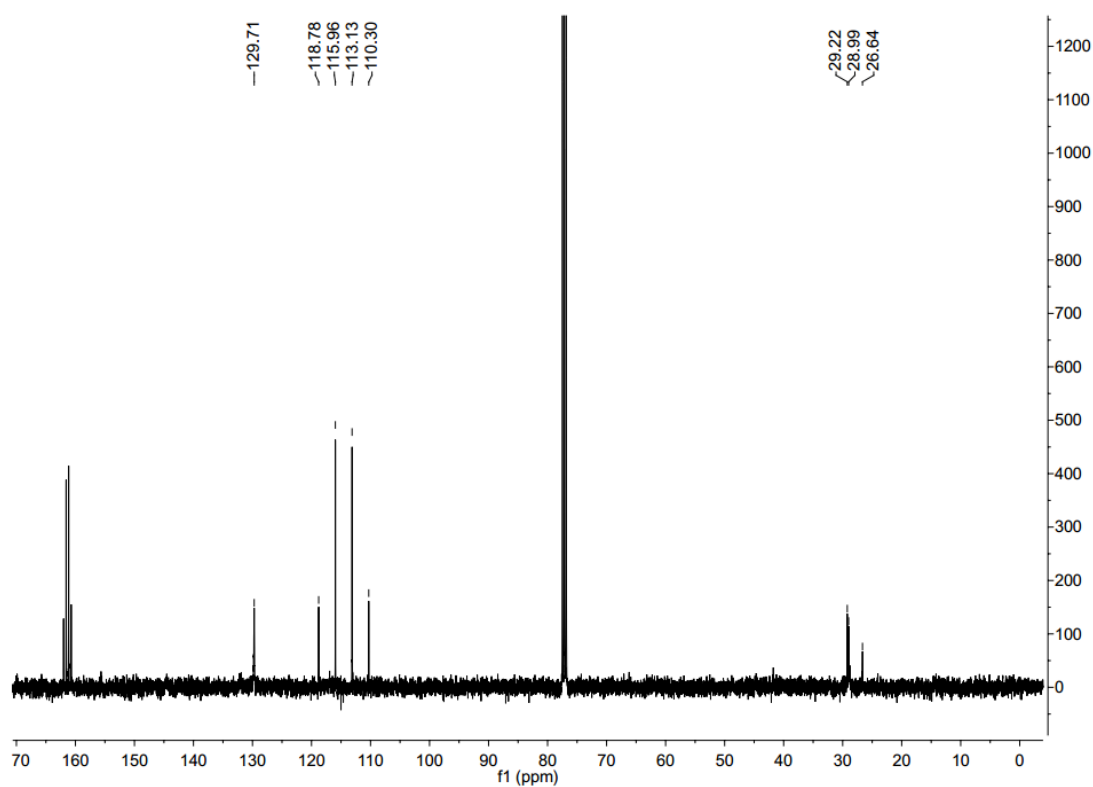

Figure S134  $^{13}\text{C}$  NMR spectrum of compound **25e**.

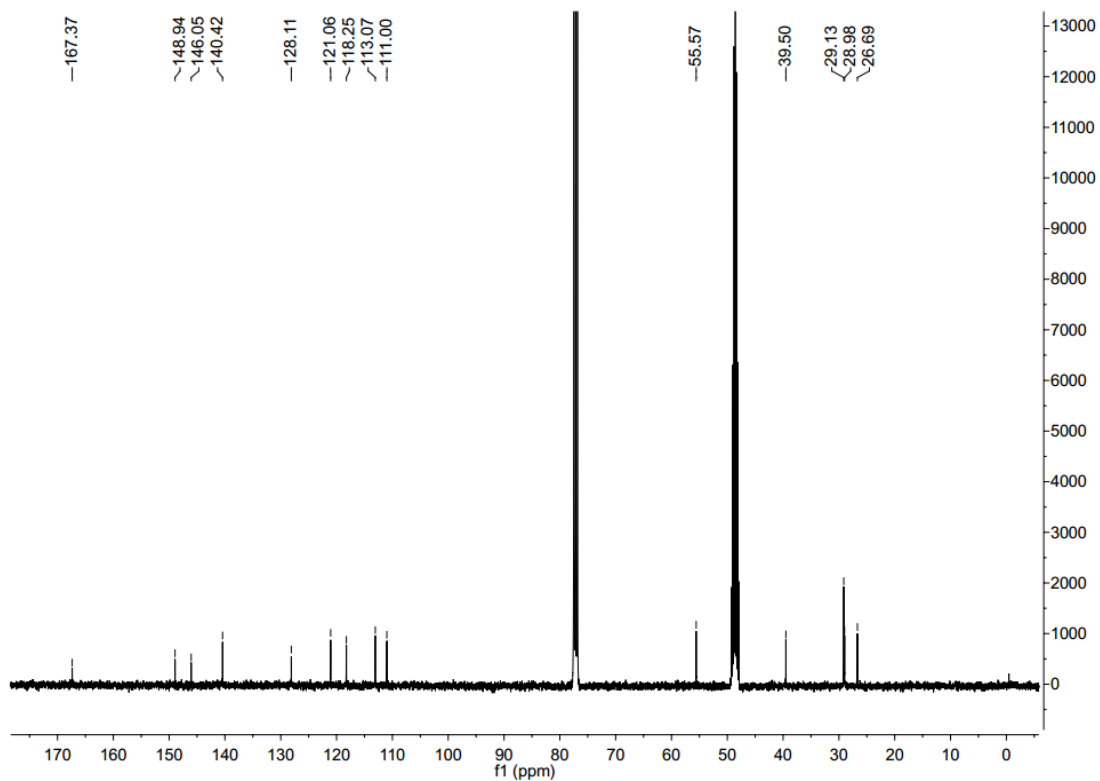

Figure S135  $^{13}\text{C}$  NMR spectrum of compound **26e**.

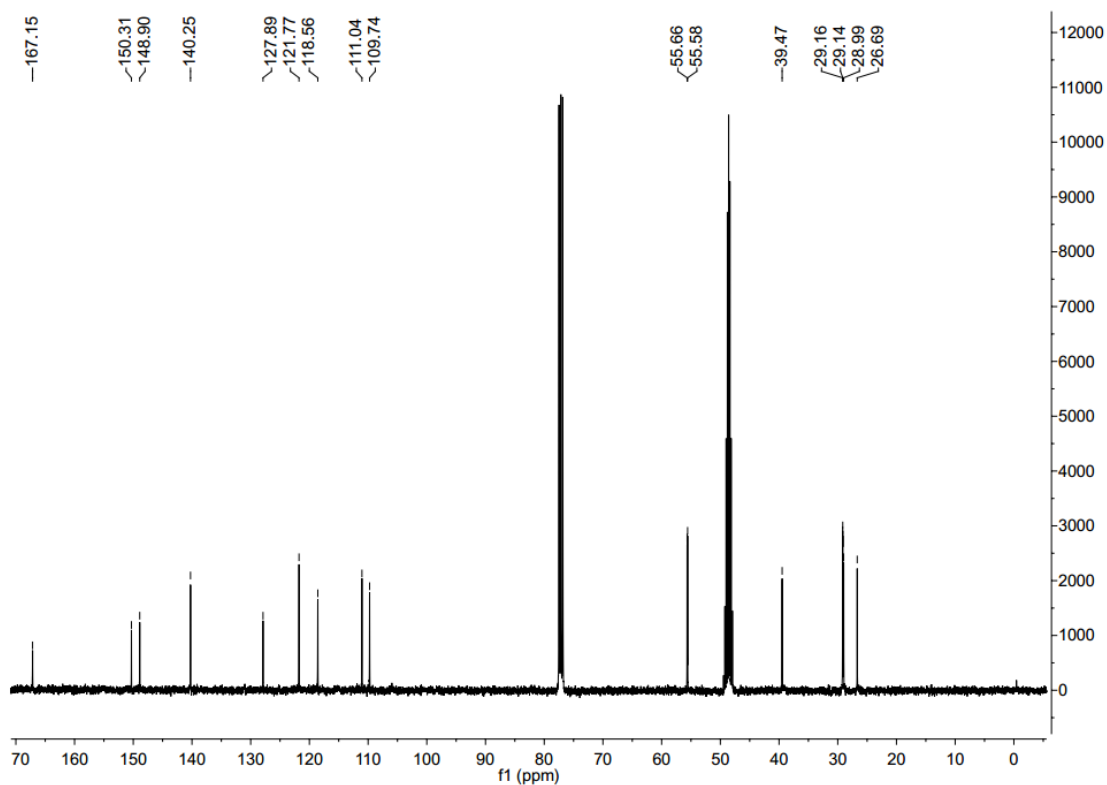

Figure S136  $^{13}\text{C}$  NMR spectrum of compound **27e**.

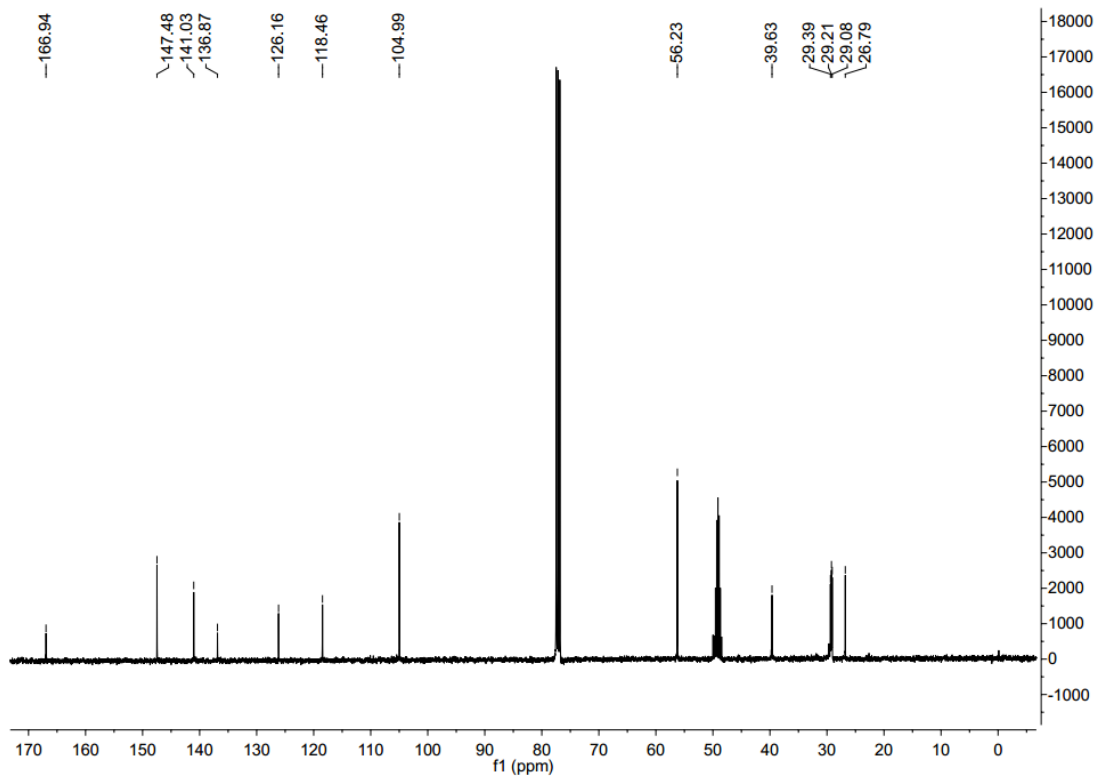

Figure S137  $^{13}\text{C}$  NMR spectrum of compound **28e**.

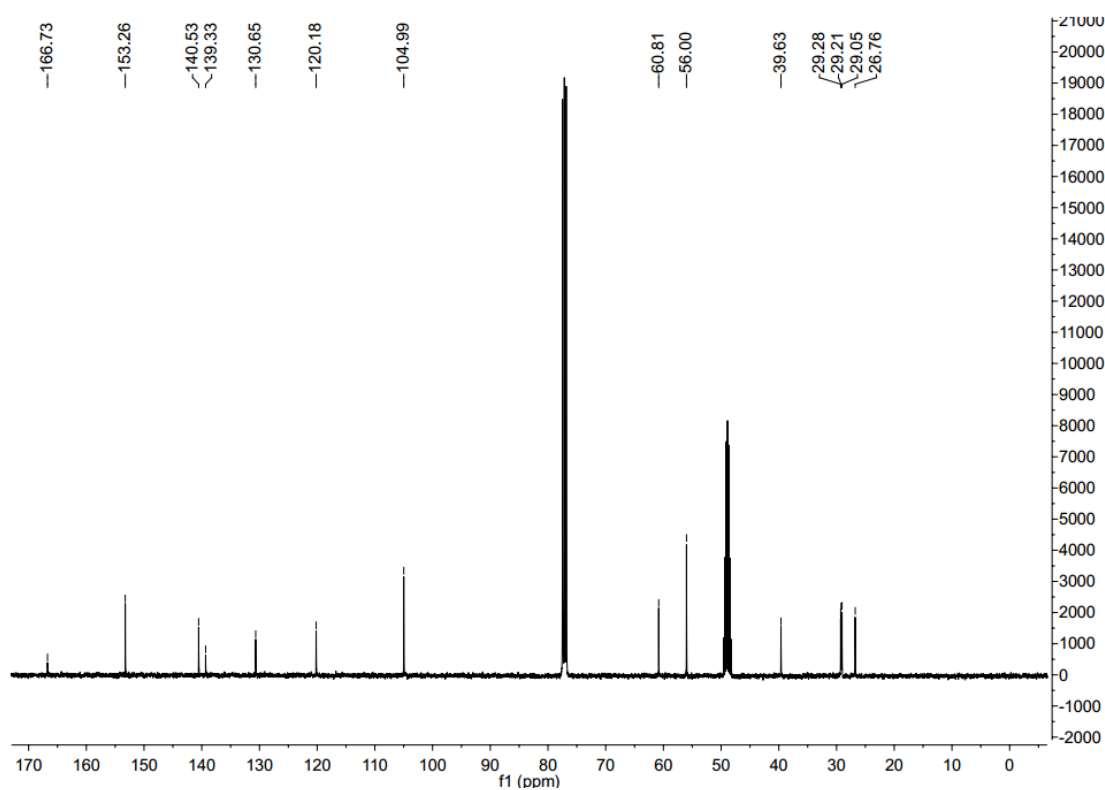

Figure S138  $^{13}\text{C}$  NMR spectrum of compound **29e**.

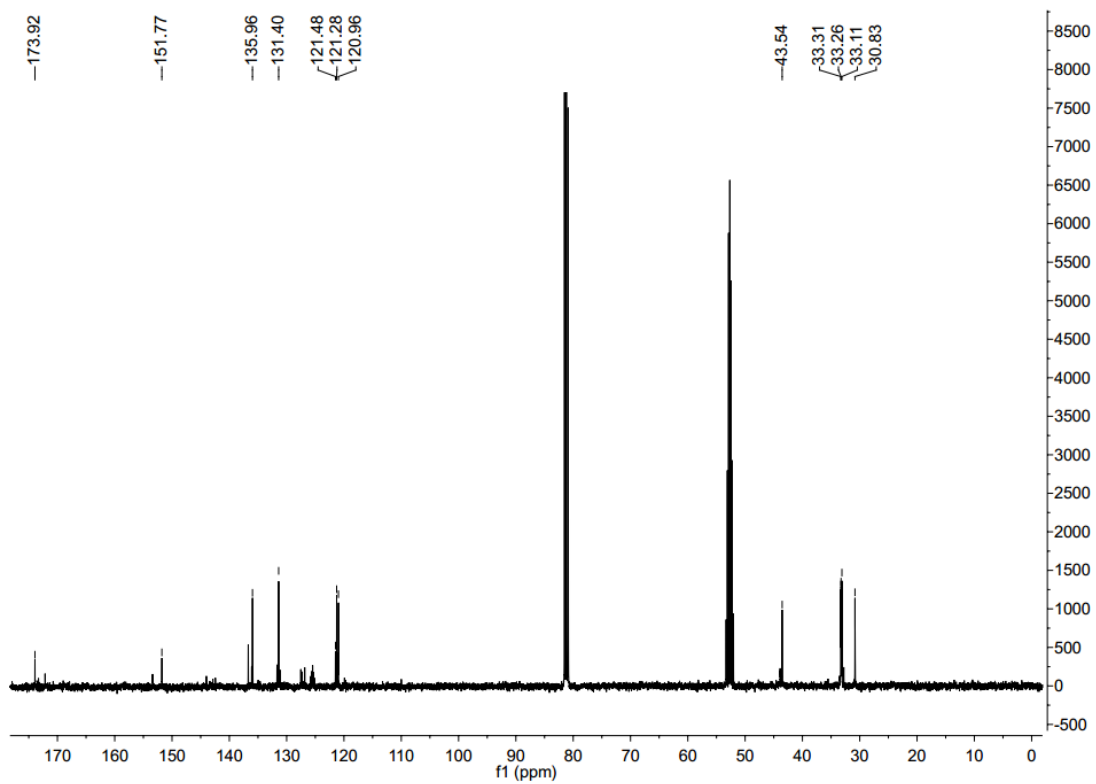

Figure S139  $^{13}\text{C}$  NMR spectrum of compound **30e**.

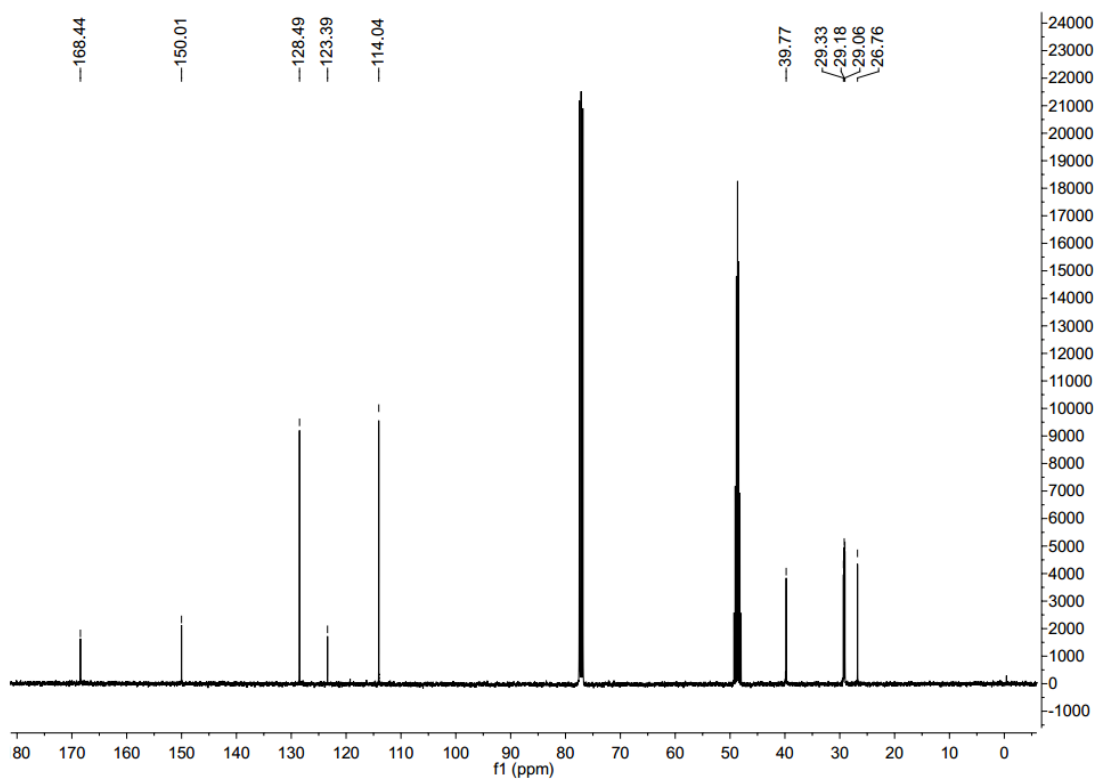

Figure S140  $^{13}\text{C}$  NMR spectrum of compound **31e**.

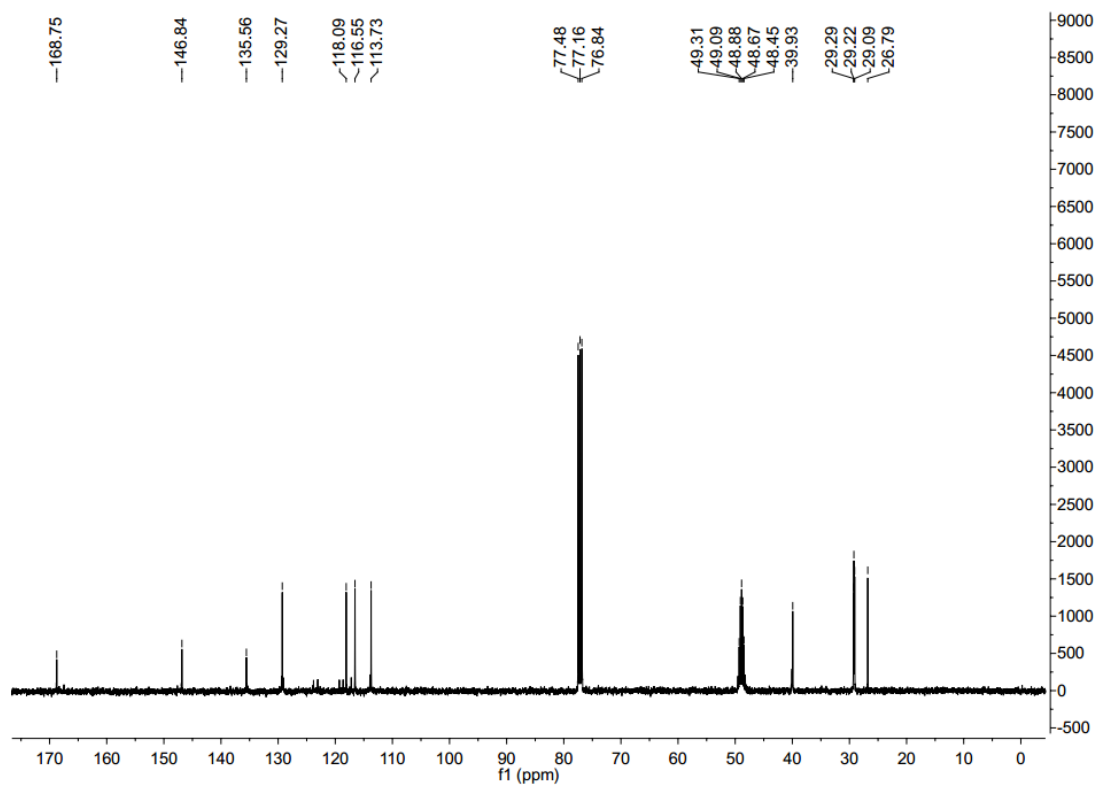

Figure S141  $^{13}\text{C}$  NMR spectrum of compound **32e**.

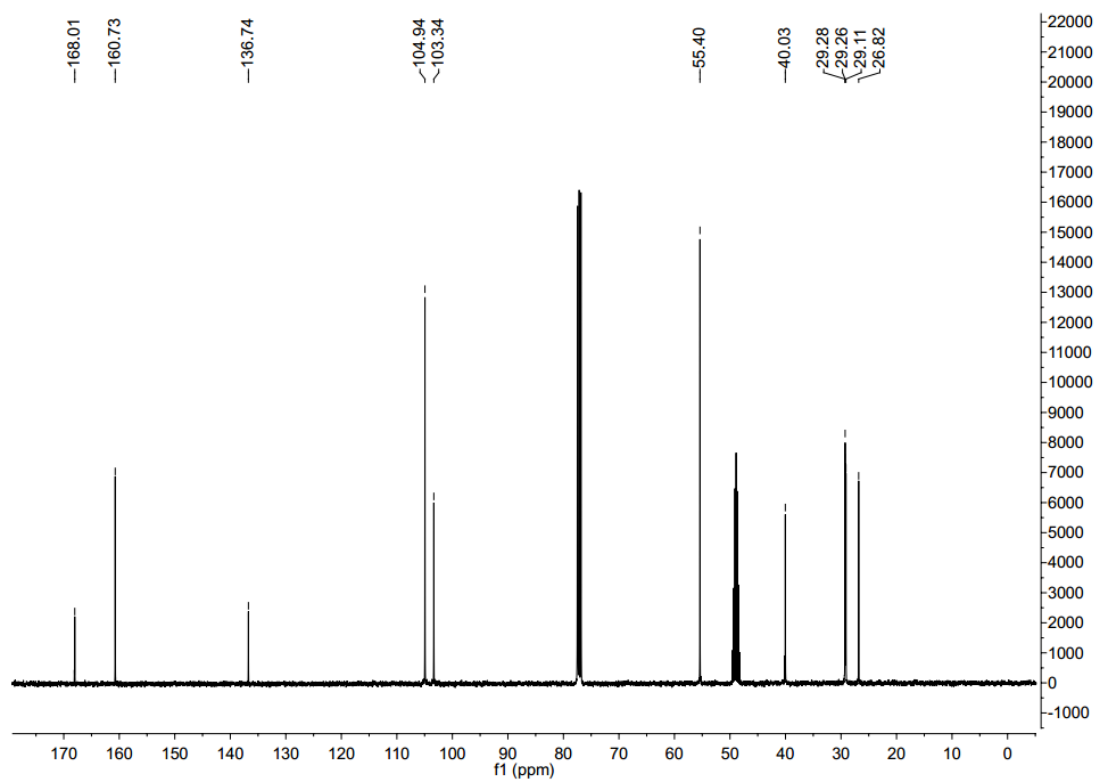

Figure S142  $^{13}\text{C}$  NMR spectrum of compound **33e**.

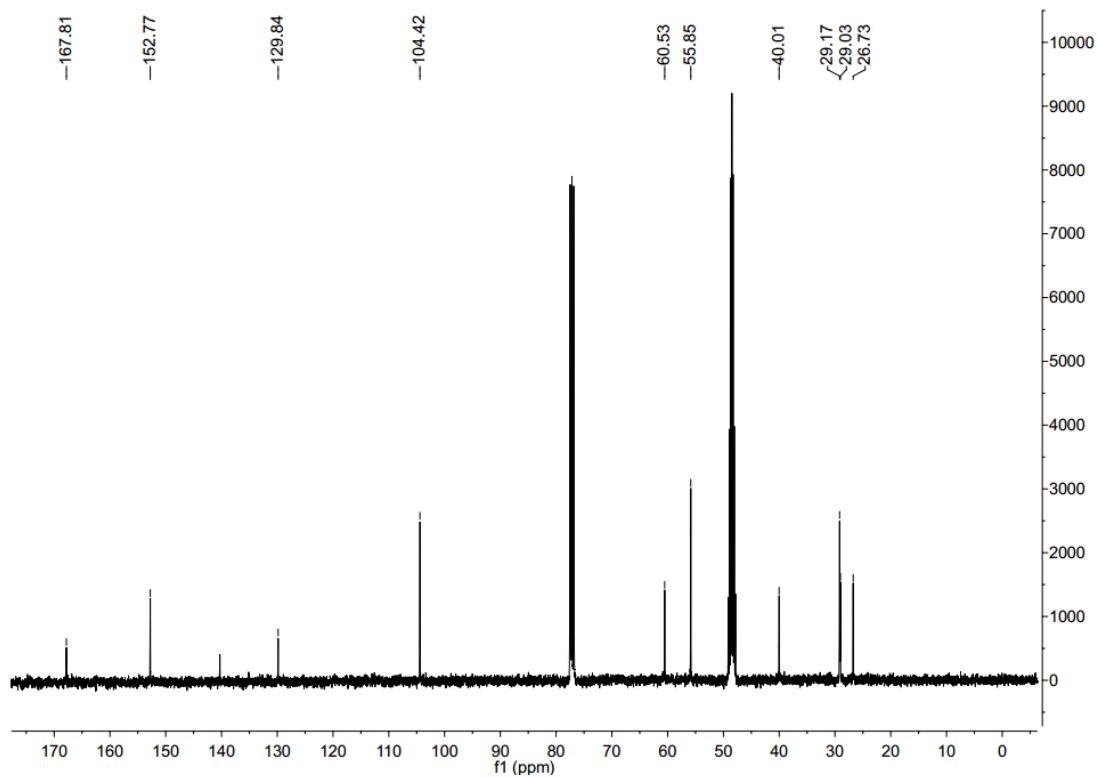

Figure S143  $^{13}\text{C}$  NMR spectrum of compound **34e**.

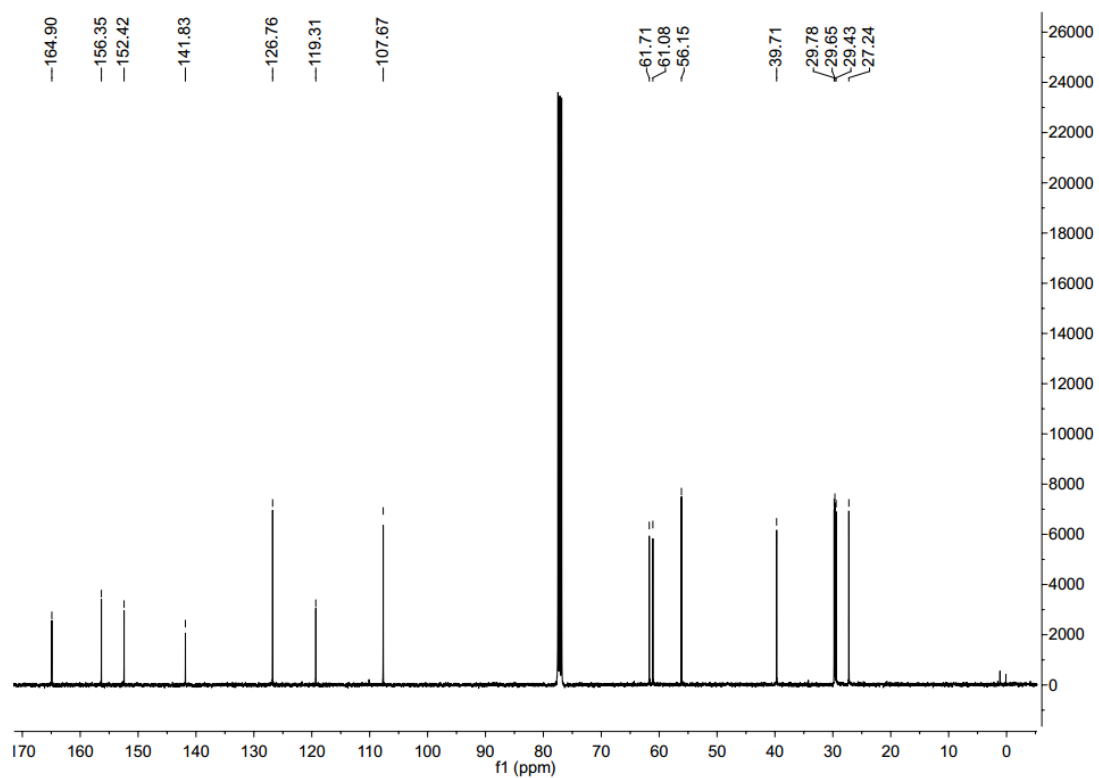

Figure S144  $^{13}\text{C}$  NMR spectrum of compound **35e**.



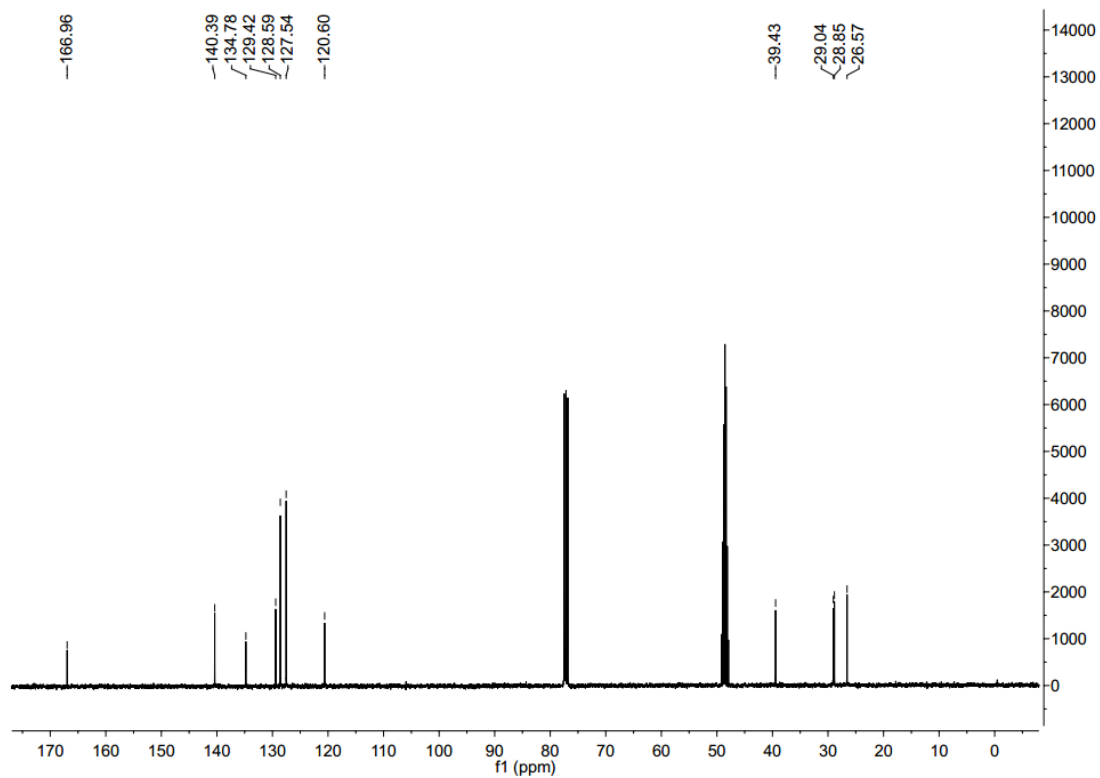

Figure S145  $^{13}\text{C}$  NMR spectrum of compound **9d**.

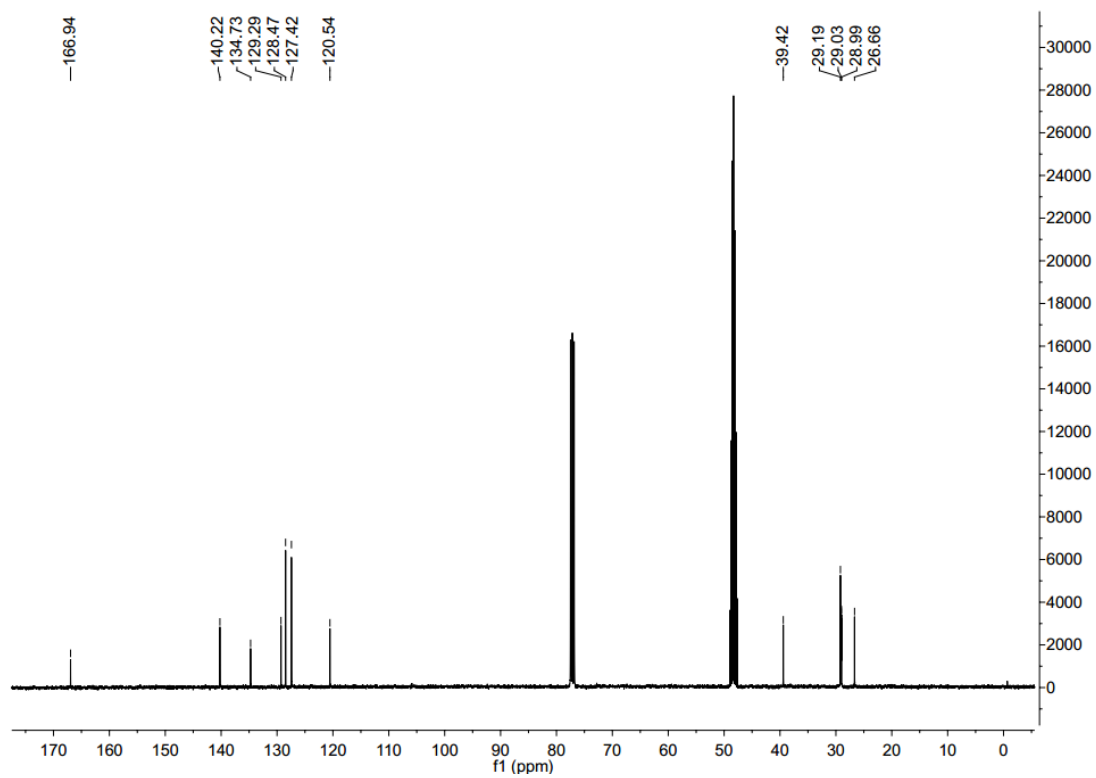

Figure S146  $^{13}\text{C}$  NMR spectrum of compound **9f**.

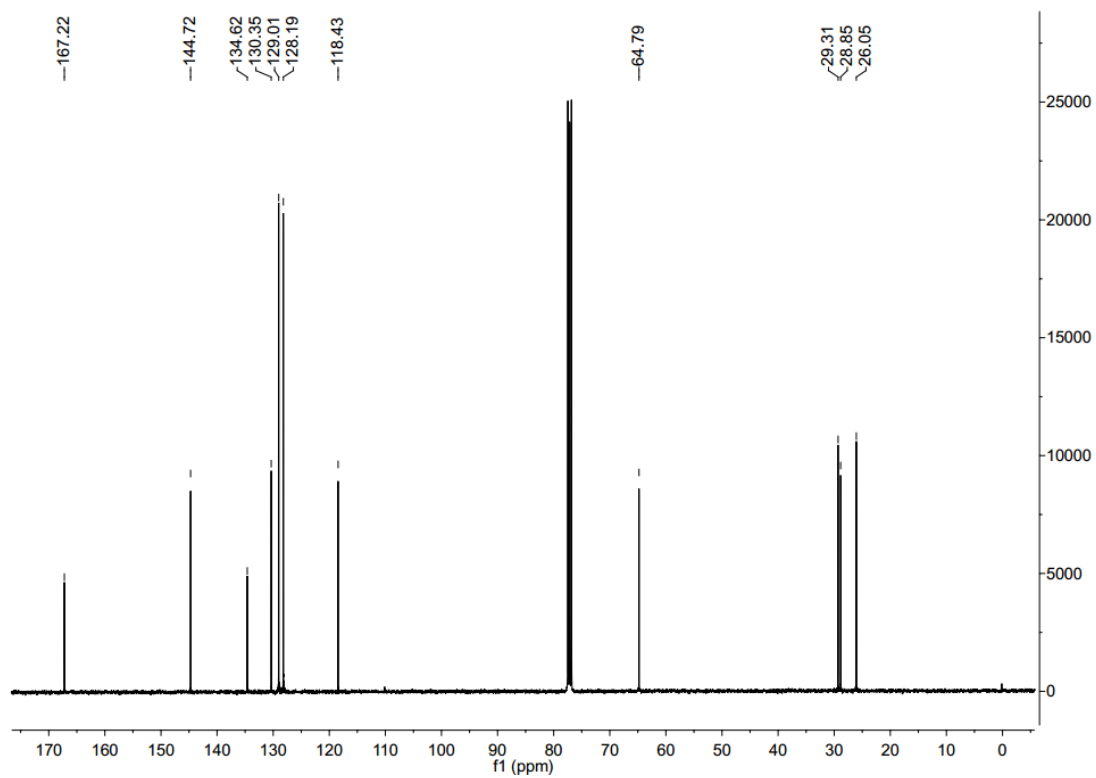

Figure S147 <sup>13</sup>C NMR spectrum of compound **9g**.

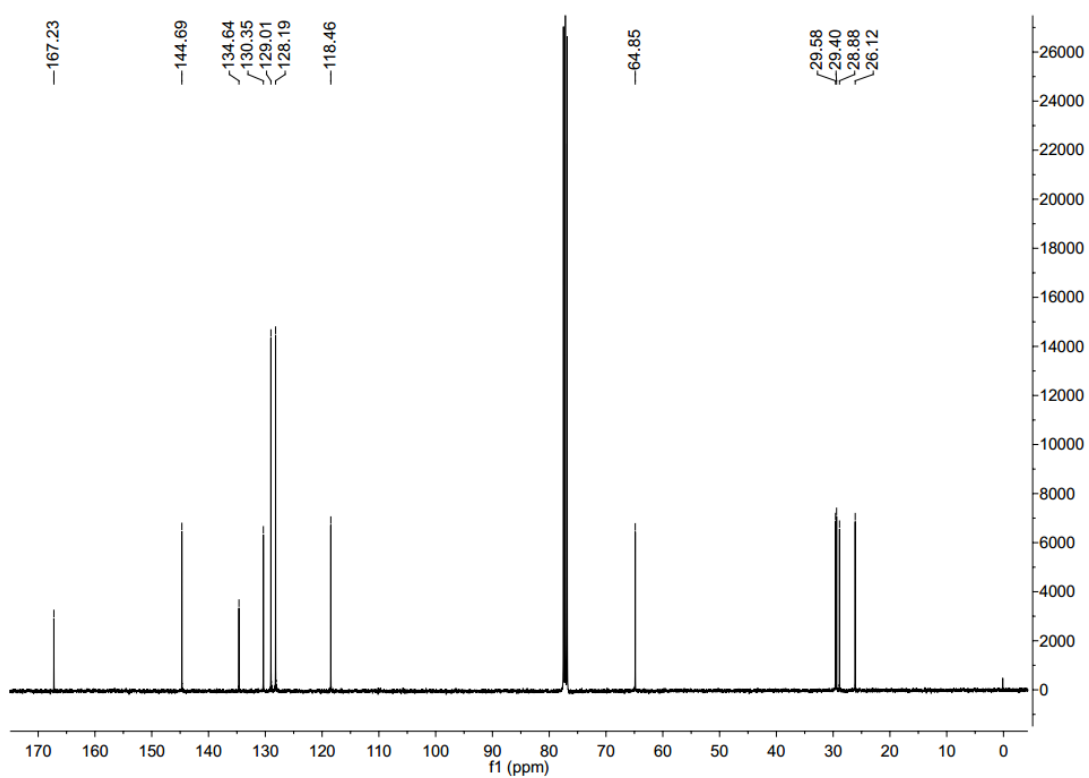

Figure S148 <sup>13</sup>C NMR spectrum of compound **9h**.

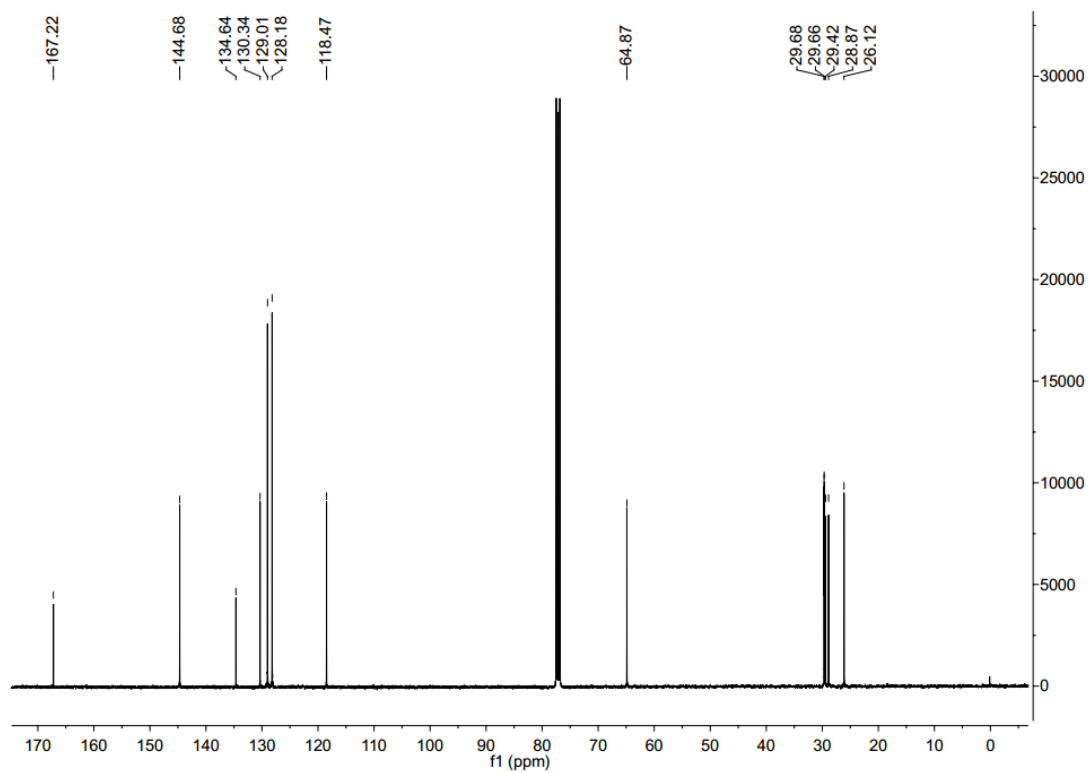

Figure S149  $^{13}\text{C}$  NMR spectrum of compound **9i**.

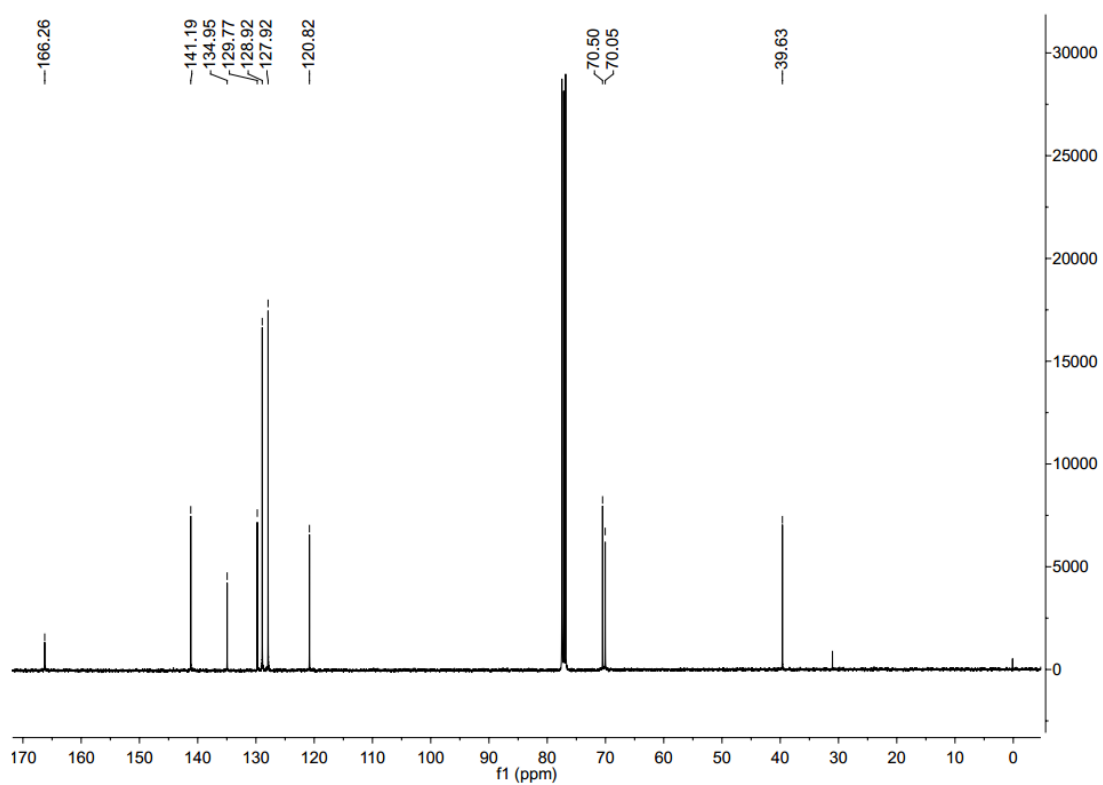

Figure S150  $^{13}\text{C}$  NMR spectrum of compound **9j**.

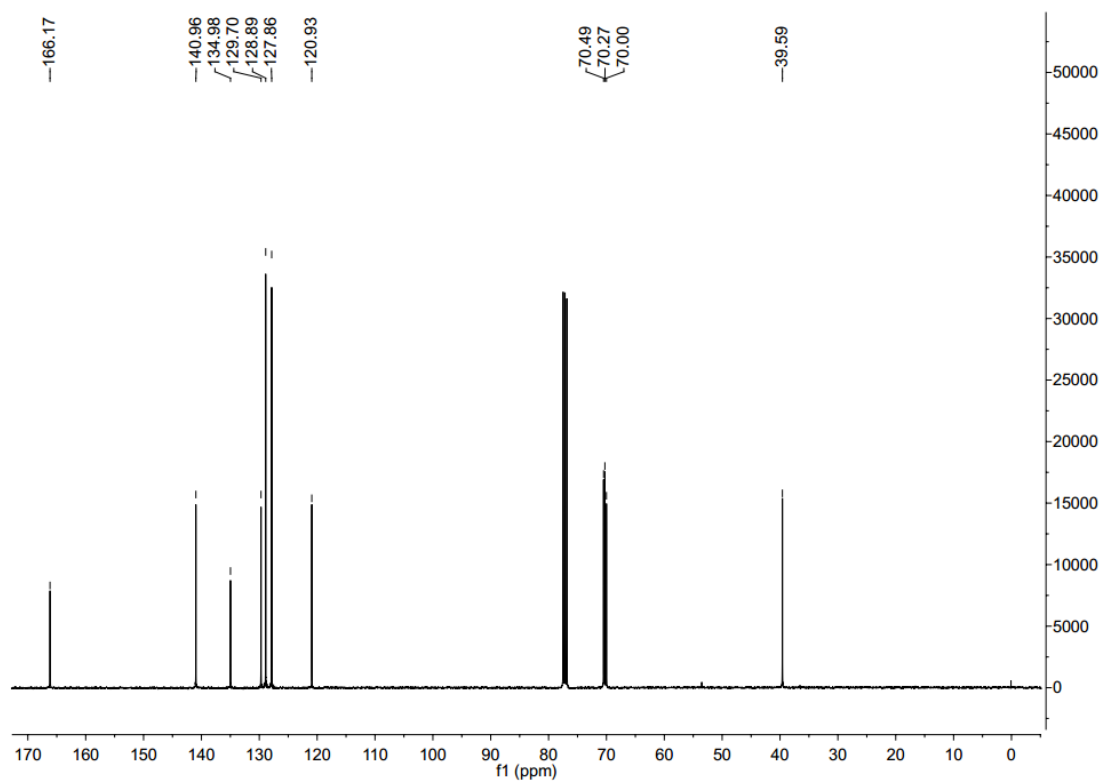

Figure S151  $^{13}\text{C}$  NMR spectrum of compound **9k**.

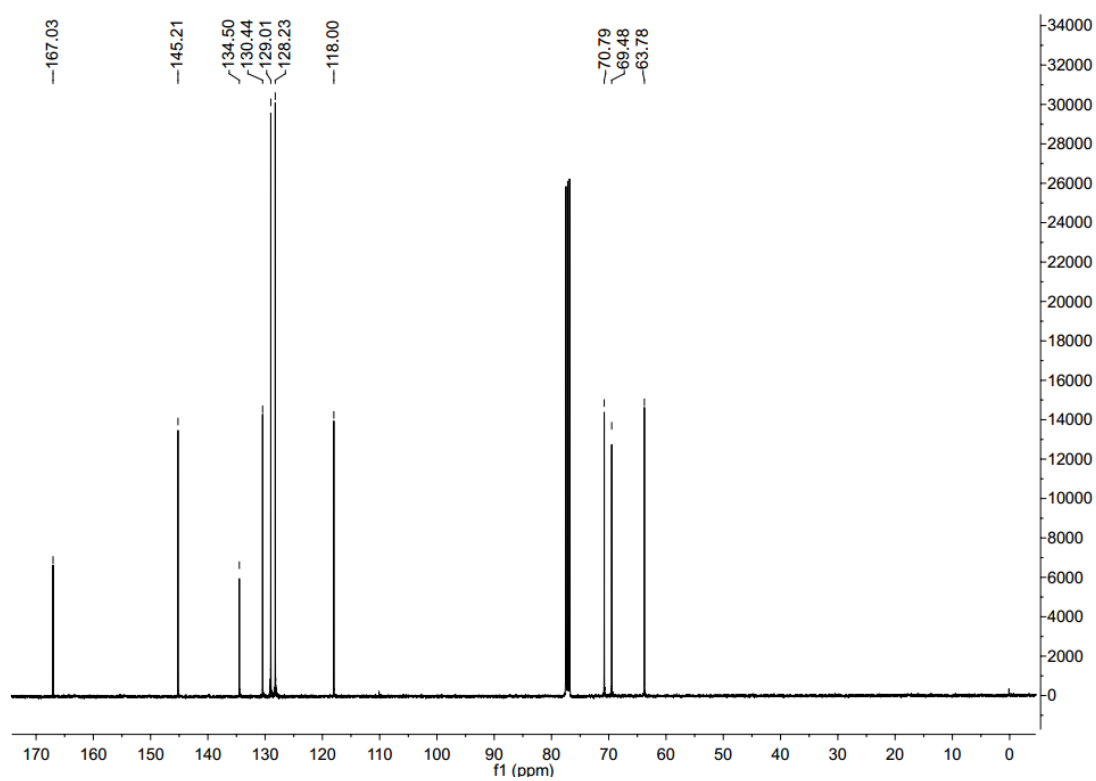

Figure S152  $^{13}\text{C}$  NMR spectrum of compound **9l**.

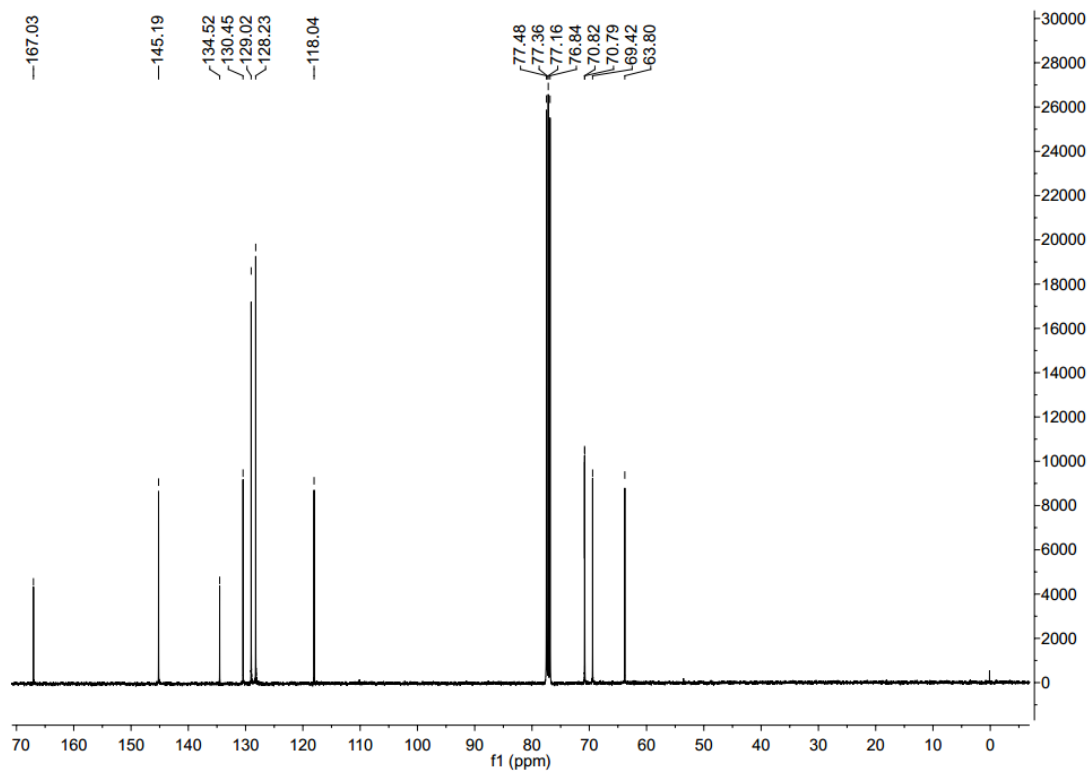

Figure S153  $^{13}\text{C}$  NMR spectrum of compound **9m**.
